# Supplementary material for: ClinCirc identifies alterations of the circadian peripheral oscillator in critical care patients
Source: JCI journal article supplement (doi:10.1172/jci162775), 2022-12-20
Supplement: sd3 [file 3]

# ICMJE DISCLOSURE FORM

**Date:** 10/5/2022

**Your Name:** Peter Cunningham

**Manuscript Title:** ClinCirc identifies alterations of the circadian peripheral oscillator in critical care patients

**Manuscript Number (if known):** 162775-JCI-CMED-1

In the interest of transparency, we ask you to disclose all relationships/activities/interests listed below that are related to the content of your manuscript. "Related" means any relation with for-profit or not-for-profit third parties whose interests may be affected by the content of the manuscript. Disclosure represents a commitment to transparency and does not necessarily indicate a bias. If you are in doubt about whether to list a relationship/activity/interest, it is preferable that you do so.

The author's relationships/activities/interests should be defined broadly. For example, if your manuscript pertains to the epidemiology of hypertension, you should declare all relationships with manufacturers of antihypertensive medication, even if that medication is not mentioned in the manuscript.

In item #1 below, report all support for the work reported in this manuscript without time limit. For all other items, the time frame for disclosure is the past 36 months.

|                                                           | Name all entities with whom you have this relationship or indicate none (add rows as needed)                                                                                                                                                                                                                                                                                                                                                                                                                                                                         | Specifications/Comments (e.g., if payments were made to you or to your institution) |                                                                                                                   |  |  |  |                                           |  |
|-----------------------------------------------------------|----------------------------------------------------------------------------------------------------------------------------------------------------------------------------------------------------------------------------------------------------------------------------------------------------------------------------------------------------------------------------------------------------------------------------------------------------------------------------------------------------------------------------------------------------------------------|-------------------------------------------------------------------------------------|-------------------------------------------------------------------------------------------------------------------|--|--|--|-------------------------------------------|--|
| <b>Time frame: Since the initial planning of the work</b> |                                                                                                                                                                                                                                                                                                                                                                                                                                                                                                                                                                      |                                                                                     |                                                                                                                   |  |  |  |                                           |  |
| <b>1</b>                                                  | <div> <div>All support for the present manuscript (e.g., funding, provision of study materials, medical writing, article processing charges, etc.)<br/><b>No time limit for this item.</b></div> <div> <input type="checkbox"/> <b>None</b> </div> </div> <table border="1"> <tr> <td>Medical Research Council</td> <td>Transition Support Fellowship awarded to John Blaikley and paid to the University of Manchester to support salary</td> </tr> <tr> <td></td> <td></td> </tr> <tr> <td></td> <td>Click the tab key to add additional rows.</td> </tr> </table> | Medical Research Council                                                            | Transition Support Fellowship awarded to John Blaikley and paid to the University of Manchester to support salary |  |  |  | Click the tab key to add additional rows. |  |
| Medical Research Council                                  | Transition Support Fellowship awarded to John Blaikley and paid to the University of Manchester to support salary                                                                                                                                                                                                                                                                                                                                                                                                                                                    |                                                                                     |                                                                                                                   |  |  |  |                                           |  |
|                                                           |                                                                                                                                                                                                                                                                                                                                                                                                                                                                                                                                                                      |                                                                                     |                                                                                                                   |  |  |  |                                           |  |
|                                                           | Click the tab key to add additional rows.                                                                                                                                                                                                                                                                                                                                                                                                                                                                                                                            |                                                                                     |                                                                                                                   |  |  |  |                                           |  |
| <b>Time frame: past 36 months</b>                         |                                                                                                                                                                                                                                                                                                                                                                                                                                                                                                                                                                      |                                                                                     |                                                                                                                   |  |  |  |                                           |  |
| <b>2</b>                                                  | <div> <div>Grants or contracts from any entity (if not indicated in item #1 above).</div> <div> <input checked="" type="checkbox"/> <b>None</b> </div> </div> <table border="1"> <tr> <td></td> <td></td> </tr> <tr> <td></td> <td></td> </tr> <tr> <td></td> <td></td> </tr> </table>                                                                                                                                                                                                                                                                               |                                                                                     |                                                                                                                   |  |  |  |                                           |  |
|                                                           |                                                                                                                                                                                                                                                                                                                                                                                                                                                                                                                                                                      |                                                                                     |                                                                                                                   |  |  |  |                                           |  |
|                                                           |                                                                                                                                                                                                                                                                                                                                                                                                                                                                                                                                                                      |                                                                                     |                                                                                                                   |  |  |  |                                           |  |
|                                                           |                                                                                                                                                                                                                                                                                                                                                                                                                                                                                                                                                                      |                                                                                     |                                                                                                                   |  |  |  |                                           |  |
| <b>3</b>                                                  | <div> <div>Royalties or licenses</div> <div> <input checked="" type="checkbox"/> <b>None</b> </div> </div> <table border="1"> <tr> <td></td> <td></td> </tr> <tr> <td></td> <td></td> </tr> <tr> <td></td> <td></td> </tr> </table>                                                                                                                                                                                                                                                                                                                                  |                                                                                     |                                                                                                                   |  |  |  |                                           |  |
|                                                           |                                                                                                                                                                                                                                                                                                                                                                                                                                                                                                                                                                      |                                                                                     |                                                                                                                   |  |  |  |                                           |  |
|                                                           |                                                                                                                                                                                                                                                                                                                                                                                                                                                                                                                                                                      |                                                                                     |                                                                                                                   |  |  |  |                                           |  |
|                                                           |                                                                                                                                                                                                                                                                                                                                                                                                                                                                                                                                                                      |                                                                                     |                                                                                                                   |  |  |  |                                           |  |

|    |                                                                                                              | Name all entities with whom you have this relationship or indicate none (add rows as needed)                                                                                                   | Specifications/Comments (e.g., if payments were made to you or to your institution) |  |  |  |  |  |  |  |  |
|----|--------------------------------------------------------------------------------------------------------------|------------------------------------------------------------------------------------------------------------------------------------------------------------------------------------------------|-------------------------------------------------------------------------------------|--|--|--|--|--|--|--|--|
| 4  | Consulting fees                                                                                              | <input checked="" type="checkbox"/> <b>None</b><br><table border="1"> <tr><td></td><td></td></tr> <tr><td></td><td></td></tr> <tr><td></td><td></td></tr> <tr><td></td><td></td></tr> </table> |                                                                                     |  |  |  |  |  |  |  |  |
|    |                                                                                                              |                                                                                                                                                                                                |                                                                                     |  |  |  |  |  |  |  |  |
|    |                                                                                                              |                                                                                                                                                                                                |                                                                                     |  |  |  |  |  |  |  |  |
|    |                                                                                                              |                                                                                                                                                                                                |                                                                                     |  |  |  |  |  |  |  |  |
|    |                                                                                                              |                                                                                                                                                                                                |                                                                                     |  |  |  |  |  |  |  |  |
| 5  | Payment or honoraria for lectures, presentations, speakers bureaus, manuscript writing or educational events | <input checked="" type="checkbox"/> <b>None</b><br><table border="1"> <tr><td></td><td></td></tr> <tr><td></td><td></td></tr> <tr><td></td><td></td></tr> </table>                             |                                                                                     |  |  |  |  |  |  |  |  |
|    |                                                                                                              |                                                                                                                                                                                                |                                                                                     |  |  |  |  |  |  |  |  |
|    |                                                                                                              |                                                                                                                                                                                                |                                                                                     |  |  |  |  |  |  |  |  |
|    |                                                                                                              |                                                                                                                                                                                                |                                                                                     |  |  |  |  |  |  |  |  |
| 6  | Payment for expert testimony                                                                                 | <input checked="" type="checkbox"/> <b>None</b><br><table border="1"> <tr><td></td><td></td></tr> <tr><td></td><td></td></tr> <tr><td></td><td></td></tr> </table>                             |                                                                                     |  |  |  |  |  |  |  |  |
|    |                                                                                                              |                                                                                                                                                                                                |                                                                                     |  |  |  |  |  |  |  |  |
|    |                                                                                                              |                                                                                                                                                                                                |                                                                                     |  |  |  |  |  |  |  |  |
|    |                                                                                                              |                                                                                                                                                                                                |                                                                                     |  |  |  |  |  |  |  |  |
| 7  | Support for attending meetings and/or travel                                                                 | <input checked="" type="checkbox"/> <b>None</b><br><table border="1"> <tr><td></td><td></td></tr> <tr><td></td><td></td></tr> <tr><td></td><td></td></tr> </table>                             |                                                                                     |  |  |  |  |  |  |  |  |
|    |                                                                                                              |                                                                                                                                                                                                |                                                                                     |  |  |  |  |  |  |  |  |
|    |                                                                                                              |                                                                                                                                                                                                |                                                                                     |  |  |  |  |  |  |  |  |
|    |                                                                                                              |                                                                                                                                                                                                |                                                                                     |  |  |  |  |  |  |  |  |
| 8  | Patents planned, issued or pending                                                                           | <input checked="" type="checkbox"/> <b>None</b><br><table border="1"> <tr><td></td><td></td></tr> <tr><td></td><td></td></tr> <tr><td></td><td></td></tr> </table>                             |                                                                                     |  |  |  |  |  |  |  |  |
|    |                                                                                                              |                                                                                                                                                                                                |                                                                                     |  |  |  |  |  |  |  |  |
|    |                                                                                                              |                                                                                                                                                                                                |                                                                                     |  |  |  |  |  |  |  |  |
|    |                                                                                                              |                                                                                                                                                                                                |                                                                                     |  |  |  |  |  |  |  |  |
| 9  | Participation on a Data Safety Monitoring Board or Advisory Board                                            | <input checked="" type="checkbox"/> <b>None</b><br><table border="1"> <tr><td></td><td></td></tr> <tr><td></td><td></td></tr> <tr><td></td><td></td></tr> </table>                             |                                                                                     |  |  |  |  |  |  |  |  |
|    |                                                                                                              |                                                                                                                                                                                                |                                                                                     |  |  |  |  |  |  |  |  |
|    |                                                                                                              |                                                                                                                                                                                                |                                                                                     |  |  |  |  |  |  |  |  |
|    |                                                                                                              |                                                                                                                                                                                                |                                                                                     |  |  |  |  |  |  |  |  |
| 10 | Leadership or fiduciary role in other board, society, committee or advocacy group, paid or unpaid            | <input checked="" type="checkbox"/> <b>None</b><br><table border="1"> <tr><td></td><td></td></tr> <tr><td></td><td></td></tr> <tr><td></td><td></td></tr> </table>                             |                                                                                     |  |  |  |  |  |  |  |  |
|    |                                                                                                              |                                                                                                                                                                                                |                                                                                     |  |  |  |  |  |  |  |  |
|    |                                                                                                              |                                                                                                                                                                                                |                                                                                     |  |  |  |  |  |  |  |  |
|    |                                                                                                              |                                                                                                                                                                                                |                                                                                     |  |  |  |  |  |  |  |  |

|           |                                                                                  | Name all entities with whom you have this relationship or indicate none (add rows as needed)                                                                                                          | Specifications/Comments (e.g., if payments were made to you or to your institution) |  |  |  |  |  |  |
|-----------|----------------------------------------------------------------------------------|-------------------------------------------------------------------------------------------------------------------------------------------------------------------------------------------------------|-------------------------------------------------------------------------------------|--|--|--|--|--|--|
| <b>11</b> | Stock or stock options                                                           | <input checked="" type="checkbox"/> <b>None</b> <table border="1" style="width: 100%; margin-top: 5px;"> <tr><td></td><td></td></tr> <tr><td></td><td></td></tr> <tr><td></td><td></td></tr> </table> |                                                                                     |  |  |  |  |  |  |
|           |                                                                                  |                                                                                                                                                                                                       |                                                                                     |  |  |  |  |  |  |
|           |                                                                                  |                                                                                                                                                                                                       |                                                                                     |  |  |  |  |  |  |
|           |                                                                                  |                                                                                                                                                                                                       |                                                                                     |  |  |  |  |  |  |
| <b>12</b> | Receipt of equipment, materials, drugs, medical writing, gifts or other services | <input checked="" type="checkbox"/> <b>None</b> <table border="1" style="width: 100%; margin-top: 5px;"> <tr><td></td><td></td></tr> <tr><td></td><td></td></tr> <tr><td></td><td></td></tr> </table> |                                                                                     |  |  |  |  |  |  |
|           |                                                                                  |                                                                                                                                                                                                       |                                                                                     |  |  |  |  |  |  |
|           |                                                                                  |                                                                                                                                                                                                       |                                                                                     |  |  |  |  |  |  |
|           |                                                                                  |                                                                                                                                                                                                       |                                                                                     |  |  |  |  |  |  |
| <b>13</b> | Other financial or non-financial interests                                       | <input checked="" type="checkbox"/> <b>None</b> <table border="1" style="width: 100%; margin-top: 5px;"> <tr><td></td><td></td></tr> <tr><td></td><td></td></tr> <tr><td></td><td></td></tr> </table> |                                                                                     |  |  |  |  |  |  |
|           |                                                                                  |                                                                                                                                                                                                       |                                                                                     |  |  |  |  |  |  |
|           |                                                                                  |                                                                                                                                                                                                       |                                                                                     |  |  |  |  |  |  |
|           |                                                                                  |                                                                                                                                                                                                       |                                                                                     |  |  |  |  |  |  |

**Please place an "X" next to the following statement to indicate your agreement:**

☒ I certify that I have answered every question and have not altered the wording of any of the questions on this form.

# ICMJE DISCLOSURE FORM

**Date:** 10/1/2022

**Your Name:** Gareth Kitchen

**Manuscript Title:** ClinCirc identifies alterations of the circadian peripheral oscillator in critical care patients

**Manuscript Number (if known):** 162775-JCI-CMED-1

In the interest of transparency, we ask you to disclose all relationships/activities/interests listed below that are related to the content of your manuscript. "Related" means any relation with for-profit or not-for-profit third parties whose interests may be affected by the content of the manuscript. Disclosure represents a commitment to transparency and does not necessarily indicate a bias. If you are in doubt about whether to list a relationship/activity/interest, it is preferable that you do so.

The author's relationships/activities/interests should be defined broadly. For example, if your manuscript pertains to the epidemiology of hypertension, you should declare all relationships with manufacturers of antihypertensive medication, even if that medication is not mentioned in the manuscript.

In item #1 below, report all support for the work reported in this manuscript without time limit. For all other items, the time frame for disclosure is the past 36 months.

|                                                                | Name all entities with whom you have this relationship or indicate none (add rows as needed)                                                                                                                                                              | Specifications/Comments (e.g., if payments were made to you or to your institution)                                                                                                                                                                                                                                                                                                                                                                                                                                                                                                                                                                                  |                                                         |                                                             |                                                   |                                                                          |                                                                |                                                                                                             |                          |                                                               |
|----------------------------------------------------------------|-----------------------------------------------------------------------------------------------------------------------------------------------------------------------------------------------------------------------------------------------------------|----------------------------------------------------------------------------------------------------------------------------------------------------------------------------------------------------------------------------------------------------------------------------------------------------------------------------------------------------------------------------------------------------------------------------------------------------------------------------------------------------------------------------------------------------------------------------------------------------------------------------------------------------------------------|---------------------------------------------------------|-------------------------------------------------------------|---------------------------------------------------|--------------------------------------------------------------------------|----------------------------------------------------------------|-------------------------------------------------------------------------------------------------------------|--------------------------|---------------------------------------------------------------|
| <b>Time frame: Since the initial planning of the work</b>      |                                                                                                                                                                                                                                                           |                                                                                                                                                                                                                                                                                                                                                                                                                                                                                                                                                                                                                                                                      |                                                         |                                                             |                                                   |                                                                          |                                                                |                                                                                                             |                          |                                                               |
| <b>1</b>                                                       | <div> <div>All support for the present manuscript (e.g., funding, provision of study materials, medical writing, article processing charges, etc.)<br/><b>No time limit for this item.</b></div> <div> <input type="checkbox"/> <b>None</b> </div> </div> | <table border="1"> <tr> <td>2015-2018 – MRC – Clinical Research Training Fellowship</td> <td>Payments to the University of Manchester<br/><b>£267,000</b></td> </tr> <tr> <td>2018 – 2021 -NIHR – Academic Clinical lectureship</td> <td>Payments to the University of Manchester<br/><b>50% = academic salary</b></td> </tr> <tr> <td>2021 – Current – NIHR Development and Skills Enhancement award</td> <td>Payments to the University of Manchester -<br/><b>£60,888</b> <small>tab key to add additional rows.</small></td> </tr> <tr> <td>BJA / RCoA project grant</td> <td>Payments to the University of Manchester -<br/><b>£69,929.</b></td> </tr> </table> | 2015-2018 – MRC – Clinical Research Training Fellowship | Payments to the University of Manchester<br><b>£267,000</b> | 2018 – 2021 -NIHR – Academic Clinical lectureship | Payments to the University of Manchester<br><b>50% = academic salary</b> | 2021 – Current – NIHR Development and Skills Enhancement award | Payments to the University of Manchester -<br><b>£60,888</b> <small>tab key to add additional rows.</small> | BJA / RCoA project grant | Payments to the University of Manchester -<br><b>£69,929.</b> |
| 2015-2018 – MRC – Clinical Research Training Fellowship        | Payments to the University of Manchester<br><b>£267,000</b>                                                                                                                                                                                               |                                                                                                                                                                                                                                                                                                                                                                                                                                                                                                                                                                                                                                                                      |                                                         |                                                             |                                                   |                                                                          |                                                                |                                                                                                             |                          |                                                               |
| 2018 – 2021 -NIHR – Academic Clinical lectureship              | Payments to the University of Manchester<br><b>50% = academic salary</b>                                                                                                                                                                                  |                                                                                                                                                                                                                                                                                                                                                                                                                                                                                                                                                                                                                                                                      |                                                         |                                                             |                                                   |                                                                          |                                                                |                                                                                                             |                          |                                                               |
| 2021 – Current – NIHR Development and Skills Enhancement award | Payments to the University of Manchester -<br><b>£60,888</b> <small>tab key to add additional rows.</small>                                                                                                                                               |                                                                                                                                                                                                                                                                                                                                                                                                                                                                                                                                                                                                                                                                      |                                                         |                                                             |                                                   |                                                                          |                                                                |                                                                                                             |                          |                                                               |
| BJA / RCoA project grant                                       | Payments to the University of Manchester -<br><b>£69,929.</b>                                                                                                                                                                                             |                                                                                                                                                                                                                                                                                                                                                                                                                                                                                                                                                                                                                                                                      |                                                         |                                                             |                                                   |                                                                          |                                                                |                                                                                                             |                          |                                                               |
| <b>Time frame: past 36 months</b>                              |                                                                                                                                                                                                                                                           |                                                                                                                                                                                                                                                                                                                                                                                                                                                                                                                                                                                                                                                                      |                                                         |                                                             |                                                   |                                                                          |                                                                |                                                                                                             |                          |                                                               |
| <b>2</b>                                                       | <div> <div>Grants or contracts from any entity (if not indicated in item #1 above).</div> <div> <input checked="" type="checkbox"/> <b>None</b> </div> </div>                                                                                             | <table border="1"> <tr><td></td><td></td></tr> <tr><td></td><td></td></tr> <tr><td></td><td></td></tr> </table>                                                                                                                                                                                                                                                                                                                                                                                                                                                                                                                                                      |                                                         |                                                             |                                                   |                                                                          |                                                                |                                                                                                             |                          |                                                               |
|                                                                |                                                                                                                                                                                                                                                           |                                                                                                                                                                                                                                                                                                                                                                                                                                                                                                                                                                                                                                                                      |                                                         |                                                             |                                                   |                                                                          |                                                                |                                                                                                             |                          |                                                               |
|                                                                |                                                                                                                                                                                                                                                           |                                                                                                                                                                                                                                                                                                                                                                                                                                                                                                                                                                                                                                                                      |                                                         |                                                             |                                                   |                                                                          |                                                                |                                                                                                             |                          |                                                               |
|                                                                |                                                                                                                                                                                                                                                           |                                                                                                                                                                                                                                                                                                                                                                                                                                                                                                                                                                                                                                                                      |                                                         |                                                             |                                                   |                                                                          |                                                                |                                                                                                             |                          |                                                               |
| <b>3</b>                                                       | <div> <div>Royalties or licenses</div> <div> <input checked="" type="checkbox"/> <b>None</b> </div> </div>                                                                                                                                                | <table border="1"> <tr><td></td><td></td></tr> <tr><td></td><td></td></tr> <tr><td></td><td></td></tr> </table>                                                                                                                                                                                                                                                                                                                                                                                                                                                                                                                                                      |                                                         |                                                             |                                                   |                                                                          |                                                                |                                                                                                             |                          |                                                               |
|                                                                |                                                                                                                                                                                                                                                           |                                                                                                                                                                                                                                                                                                                                                                                                                                                                                                                                                                                                                                                                      |                                                         |                                                             |                                                   |                                                                          |                                                                |                                                                                                             |                          |                                                               |
|                                                                |                                                                                                                                                                                                                                                           |                                                                                                                                                                                                                                                                                                                                                                                                                                                                                                                                                                                                                                                                      |                                                         |                                                             |                                                   |                                                                          |                                                                |                                                                                                             |                          |                                                               |
|                                                                |                                                                                                                                                                                                                                                           |                                                                                                                                                                                                                                                                                                                                                                                                                                                                                                                                                                                                                                                                      |                                                         |                                                             |                                                   |                                                                          |                                                                |                                                                                                             |                          |                                                               |

|                                                                                                                                                     |                                                                                                              | Name all entities with whom you have this relationship or indicate none (add rows as needed)                                                                                                                                                                                                                  | Specifications/Comments (e.g., if payments were made to you or to your institution) |                                                                                                                                                     |  |  |  |  |  |  |  |
|-----------------------------------------------------------------------------------------------------------------------------------------------------|--------------------------------------------------------------------------------------------------------------|---------------------------------------------------------------------------------------------------------------------------------------------------------------------------------------------------------------------------------------------------------------------------------------------------------------|-------------------------------------------------------------------------------------|-----------------------------------------------------------------------------------------------------------------------------------------------------|--|--|--|--|--|--|--|
| 4                                                                                                                                                   | Consulting fees                                                                                              | <input checked="" type="checkbox"/> <b>None</b><br><table border="1"> <tr><td></td><td></td></tr> <tr><td></td><td></td></tr> <tr><td></td><td></td></tr> <tr><td></td><td></td></tr> </table>                                                                                                                |                                                                                     |                                                                                                                                                     |  |  |  |  |  |  |  |
|                                                                                                                                                     |                                                                                                              |                                                                                                                                                                                                                                                                                                               |                                                                                     |                                                                                                                                                     |  |  |  |  |  |  |  |
|                                                                                                                                                     |                                                                                                              |                                                                                                                                                                                                                                                                                                               |                                                                                     |                                                                                                                                                     |  |  |  |  |  |  |  |
|                                                                                                                                                     |                                                                                                              |                                                                                                                                                                                                                                                                                                               |                                                                                     |                                                                                                                                                     |  |  |  |  |  |  |  |
|                                                                                                                                                     |                                                                                                              |                                                                                                                                                                                                                                                                                                               |                                                                                     |                                                                                                                                                     |  |  |  |  |  |  |  |
| 5                                                                                                                                                   | Payment or honoraria for lectures, presentations, speakers bureaus, manuscript writing or educational events | <input checked="" type="checkbox"/> <b>None</b><br><table border="1"> <tr><td></td><td></td></tr> <tr><td></td><td></td></tr> <tr><td></td><td></td></tr> </table>                                                                                                                                            |                                                                                     |                                                                                                                                                     |  |  |  |  |  |  |  |
|                                                                                                                                                     |                                                                                                              |                                                                                                                                                                                                                                                                                                               |                                                                                     |                                                                                                                                                     |  |  |  |  |  |  |  |
|                                                                                                                                                     |                                                                                                              |                                                                                                                                                                                                                                                                                                               |                                                                                     |                                                                                                                                                     |  |  |  |  |  |  |  |
|                                                                                                                                                     |                                                                                                              |                                                                                                                                                                                                                                                                                                               |                                                                                     |                                                                                                                                                     |  |  |  |  |  |  |  |
| 6                                                                                                                                                   | Payment for expert testimony                                                                                 | <input checked="" type="checkbox"/> <b>None</b><br><table border="1"> <tr><td></td><td></td></tr> <tr><td></td><td></td></tr> <tr><td></td><td></td></tr> </table>                                                                                                                                            |                                                                                     |                                                                                                                                                     |  |  |  |  |  |  |  |
|                                                                                                                                                     |                                                                                                              |                                                                                                                                                                                                                                                                                                               |                                                                                     |                                                                                                                                                     |  |  |  |  |  |  |  |
|                                                                                                                                                     |                                                                                                              |                                                                                                                                                                                                                                                                                                               |                                                                                     |                                                                                                                                                     |  |  |  |  |  |  |  |
|                                                                                                                                                     |                                                                                                              |                                                                                                                                                                                                                                                                                                               |                                                                                     |                                                                                                                                                     |  |  |  |  |  |  |  |
| 7                                                                                                                                                   | Support for attending meetings and/or travel                                                                 | <input type="checkbox"/> <b>None</b><br><table border="1"> <tr> <td>Aptus Clinical paid travel and conference fees for Advance Therapies conference. Miami. This was part of the Match funding agreement with the NIHR.</td> <td></td> </tr> <tr><td></td><td></td></tr> <tr><td></td><td></td></tr> </table> |                                                                                     | Aptus Clinical paid travel and conference fees for Advance Therapies conference. Miami. This was part of the Match funding agreement with the NIHR. |  |  |  |  |  |  |  |
| Aptus Clinical paid travel and conference fees for Advance Therapies conference. Miami. This was part of the Match funding agreement with the NIHR. |                                                                                                              |                                                                                                                                                                                                                                                                                                               |                                                                                     |                                                                                                                                                     |  |  |  |  |  |  |  |
|                                                                                                                                                     |                                                                                                              |                                                                                                                                                                                                                                                                                                               |                                                                                     |                                                                                                                                                     |  |  |  |  |  |  |  |
|                                                                                                                                                     |                                                                                                              |                                                                                                                                                                                                                                                                                                               |                                                                                     |                                                                                                                                                     |  |  |  |  |  |  |  |
| 8                                                                                                                                                   | Patents planned, issued or pending                                                                           | <input checked="" type="checkbox"/> <b>None</b><br><table border="1"> <tr><td></td><td></td></tr> <tr><td></td><td></td></tr> <tr><td></td><td></td></tr> </table>                                                                                                                                            |                                                                                     |                                                                                                                                                     |  |  |  |  |  |  |  |
|                                                                                                                                                     |                                                                                                              |                                                                                                                                                                                                                                                                                                               |                                                                                     |                                                                                                                                                     |  |  |  |  |  |  |  |
|                                                                                                                                                     |                                                                                                              |                                                                                                                                                                                                                                                                                                               |                                                                                     |                                                                                                                                                     |  |  |  |  |  |  |  |
|                                                                                                                                                     |                                                                                                              |                                                                                                                                                                                                                                                                                                               |                                                                                     |                                                                                                                                                     |  |  |  |  |  |  |  |
| 9                                                                                                                                                   | Participation on a Data Safety Monitoring Board or Advisory Board                                            | <input checked="" type="checkbox"/> <b>None</b><br><table border="1"> <tr><td></td><td></td></tr> <tr><td></td><td></td></tr> <tr><td></td><td></td></tr> </table>                                                                                                                                            |                                                                                     |                                                                                                                                                     |  |  |  |  |  |  |  |
|                                                                                                                                                     |                                                                                                              |                                                                                                                                                                                                                                                                                                               |                                                                                     |                                                                                                                                                     |  |  |  |  |  |  |  |
|                                                                                                                                                     |                                                                                                              |                                                                                                                                                                                                                                                                                                               |                                                                                     |                                                                                                                                                     |  |  |  |  |  |  |  |
|                                                                                                                                                     |                                                                                                              |                                                                                                                                                                                                                                                                                                               |                                                                                     |                                                                                                                                                     |  |  |  |  |  |  |  |
| 10                                                                                                                                                  | Leadership or fiduciary role in other board, society, committee or advocacy group, paid or unpaid            | <input checked="" type="checkbox"/> <b>None</b><br><table border="1"> <tr><td></td><td></td></tr> <tr><td></td><td></td></tr> <tr><td></td><td></td></tr> </table>                                                                                                                                            |                                                                                     |                                                                                                                                                     |  |  |  |  |  |  |  |
|                                                                                                                                                     |                                                                                                              |                                                                                                                                                                                                                                                                                                               |                                                                                     |                                                                                                                                                     |  |  |  |  |  |  |  |
|                                                                                                                                                     |                                                                                                              |                                                                                                                                                                                                                                                                                                               |                                                                                     |                                                                                                                                                     |  |  |  |  |  |  |  |
|                                                                                                                                                     |                                                                                                              |                                                                                                                                                                                                                                                                                                               |                                                                                     |                                                                                                                                                     |  |  |  |  |  |  |  |

|           |                                                                                  | Name all entities with whom you have this relationship or indicate none (add rows as needed)                                                                                                                                                                                                                                                        | Specifications/Comments (e.g., if payments were made to you or to your institution) |  |  |  |  |  |  |
|-----------|----------------------------------------------------------------------------------|-----------------------------------------------------------------------------------------------------------------------------------------------------------------------------------------------------------------------------------------------------------------------------------------------------------------------------------------------------|-------------------------------------------------------------------------------------|--|--|--|--|--|--|
| <b>11</b> | Stock or stock options                                                           | <input checked="" type="checkbox"/> <b>None</b> <table border="1" style="width: 100%; border-collapse: collapse;"> <tr><td style="height: 20px;"></td><td style="height: 20px;"></td></tr> <tr><td style="height: 20px;"></td><td style="height: 20px;"></td></tr> <tr><td style="height: 20px;"></td><td style="height: 20px;"></td></tr> </table> |                                                                                     |  |  |  |  |  |  |
|           |                                                                                  |                                                                                                                                                                                                                                                                                                                                                     |                                                                                     |  |  |  |  |  |  |
|           |                                                                                  |                                                                                                                                                                                                                                                                                                                                                     |                                                                                     |  |  |  |  |  |  |
|           |                                                                                  |                                                                                                                                                                                                                                                                                                                                                     |                                                                                     |  |  |  |  |  |  |
| <b>12</b> | Receipt of equipment, materials, drugs, medical writing, gifts or other services | <input checked="" type="checkbox"/> <b>None</b> <table border="1" style="width: 100%; border-collapse: collapse;"> <tr><td style="height: 20px;"></td><td style="height: 20px;"></td></tr> <tr><td style="height: 20px;"></td><td style="height: 20px;"></td></tr> <tr><td style="height: 20px;"></td><td style="height: 20px;"></td></tr> </table> |                                                                                     |  |  |  |  |  |  |
|           |                                                                                  |                                                                                                                                                                                                                                                                                                                                                     |                                                                                     |  |  |  |  |  |  |
|           |                                                                                  |                                                                                                                                                                                                                                                                                                                                                     |                                                                                     |  |  |  |  |  |  |
|           |                                                                                  |                                                                                                                                                                                                                                                                                                                                                     |                                                                                     |  |  |  |  |  |  |
| <b>13</b> | Other financial or non-financial interests                                       | <input checked="" type="checkbox"/> <b>None</b> <table border="1" style="width: 100%; border-collapse: collapse;"> <tr><td style="height: 20px;"></td><td style="height: 20px;"></td></tr> <tr><td style="height: 20px;"></td><td style="height: 20px;"></td></tr> <tr><td style="height: 20px;"></td><td style="height: 20px;"></td></tr> </table> |                                                                                     |  |  |  |  |  |  |
|           |                                                                                  |                                                                                                                                                                                                                                                                                                                                                     |                                                                                     |  |  |  |  |  |  |
|           |                                                                                  |                                                                                                                                                                                                                                                                                                                                                     |                                                                                     |  |  |  |  |  |  |
|           |                                                                                  |                                                                                                                                                                                                                                                                                                                                                     |                                                                                     |  |  |  |  |  |  |

**Please place an "X" next to the following statement to indicate your agreement:**

☒ I certify that I have answered every question and have not altered the wording of any of the questions on this form.

## ICMJE DISCLOSURE FORM

**Date:** 10/6/2022

**Your Name:** Callum Jackson

**Manuscript Title:** ClinCirc identifies alterations of the circadian peripheral oscillator in critical care patients

**Manuscript Number (if known):** 162775-JCI-CMED-1

In the interest of transparency, we ask you to disclose all relationships/activities/interests listed below that are related to the content of your manuscript. "Related" means any relation with for-profit or not-for-profit third parties whose interests may be affected by the content of the manuscript. Disclosure represents a commitment to transparency and does not necessarily indicate a bias. If you are in doubt about whether to list a relationship/activity/interest, it is preferable that you do so.

The author's relationships/activities/interests should be defined broadly. For example, if your manuscript pertains to the epidemiology of hypertension, you should declare all relationships with manufacturers of antihypertensive medication, even if that medication is not mentioned in the manuscript.

In item #1 below, report all support for the work reported in this manuscript without time limit. For all other items, the time frame for disclosure is the past 36 months.

|                                                           |                                                                                                                                                                                | Name all entities with whom you have this relationship or indicate none (add rows as needed)                                                                                                                                                                                                                                                                                                                                                                                                                                                                          | Specifications/Comments (e.g., if payments were made to you or to your institution) |                                     |  |  |  |  |                                           |
|-----------------------------------------------------------|--------------------------------------------------------------------------------------------------------------------------------------------------------------------------------|-----------------------------------------------------------------------------------------------------------------------------------------------------------------------------------------------------------------------------------------------------------------------------------------------------------------------------------------------------------------------------------------------------------------------------------------------------------------------------------------------------------------------------------------------------------------------|-------------------------------------------------------------------------------------|-------------------------------------|--|--|--|--|-------------------------------------------|
| <b>Time frame: Since the initial planning of the work</b> |                                                                                                                                                                                |                                                                                                                                                                                                                                                                                                                                                                                                                                                                                                                                                                       |                                                                                     |                                     |  |  |  |  |                                           |
| <b>1</b>                                                  | All support for the present manuscript (e.g., funding, provision of study materials, medical writing, article processing charges, etc.)<br><b>No time limit for this item.</b> | <div style="display: flex; align-items: flex-start;"> <div style="margin-right: 10px;"><input checked="" type="checkbox"/> <b>None</b></div> <table border="1" style="width: 100%; border-collapse: collapse;"> <tr> <td style="width: 60%; padding: 2px;">Funded EPSRC Maths DTP EP/W523884/1</td> <td style="width: 40%;"></td> </tr> <tr> <td style="height: 20px;"></td> <td></td> </tr> <tr> <td style="height: 20px;"></td> <td style="text-align: center; font-size: 0.8em; color: #ccc;">Click the tab key to add additional rows.</td> </tr> </table> </div> |                                                                                     | Funded EPSRC Maths DTP EP/W523884/1 |  |  |  |  | Click the tab key to add additional rows. |
| Funded EPSRC Maths DTP EP/W523884/1                       |                                                                                                                                                                                |                                                                                                                                                                                                                                                                                                                                                                                                                                                                                                                                                                       |                                                                                     |                                     |  |  |  |  |                                           |
|                                                           |                                                                                                                                                                                |                                                                                                                                                                                                                                                                                                                                                                                                                                                                                                                                                                       |                                                                                     |                                     |  |  |  |  |                                           |
|                                                           | Click the tab key to add additional rows.                                                                                                                                      |                                                                                                                                                                                                                                                                                                                                                                                                                                                                                                                                                                       |                                                                                     |                                     |  |  |  |  |                                           |
| <b>Time frame: past 36 months</b>                         |                                                                                                                                                                                |                                                                                                                                                                                                                                                                                                                                                                                                                                                                                                                                                                       |                                                                                     |                                     |  |  |  |  |                                           |
| <b>2</b>                                                  | Grants or contracts from any entity (if not indicated in item #1 above).                                                                                                       | <div style="display: flex; align-items: flex-start;"> <div style="margin-right: 10px;"><input checked="" type="checkbox"/> <b>None</b></div> <table border="1" style="width: 100%; border-collapse: collapse;"> <tr><td style="height: 20px;"></td><td></td></tr> <tr><td style="height: 20px;"></td><td></td></tr> <tr><td style="height: 20px;"></td><td></td></tr> </table> </div>                                                                                                                                                                                 |                                                                                     |                                     |  |  |  |  |                                           |
|                                                           |                                                                                                                                                                                |                                                                                                                                                                                                                                                                                                                                                                                                                                                                                                                                                                       |                                                                                     |                                     |  |  |  |  |                                           |
|                                                           |                                                                                                                                                                                |                                                                                                                                                                                                                                                                                                                                                                                                                                                                                                                                                                       |                                                                                     |                                     |  |  |  |  |                                           |
|                                                           |                                                                                                                                                                                |                                                                                                                                                                                                                                                                                                                                                                                                                                                                                                                                                                       |                                                                                     |                                     |  |  |  |  |                                           |
| <b>3</b>                                                  | Royalties or licenses                                                                                                                                                          | <div style="display: flex; align-items: flex-start;"> <div style="margin-right: 10px;"><input checked="" type="checkbox"/> <b>None</b></div> <table border="1" style="width: 100%; border-collapse: collapse;"> <tr><td style="height: 20px;"></td><td></td></tr> <tr><td style="height: 20px;"></td><td></td></tr> <tr><td style="height: 20px;"></td><td></td></tr> </table> </div>                                                                                                                                                                                 |                                                                                     |                                     |  |  |  |  |                                           |
|                                                           |                                                                                                                                                                                |                                                                                                                                                                                                                                                                                                                                                                                                                                                                                                                                                                       |                                                                                     |                                     |  |  |  |  |                                           |
|                                                           |                                                                                                                                                                                |                                                                                                                                                                                                                                                                                                                                                                                                                                                                                                                                                                       |                                                                                     |                                     |  |  |  |  |                                           |
|                                                           |                                                                                                                                                                                |                                                                                                                                                                                                                                                                                                                                                                                                                                                                                                                                                                       |                                                                                     |                                     |  |  |  |  |                                           |

|    |                                                                                                              | Name all entities with whom you have this relationship or indicate none (add rows as needed)                                                                                                   | Specifications/Comments (e.g., if payments were made to you or to your institution) |  |  |  |  |  |  |  |  |
|----|--------------------------------------------------------------------------------------------------------------|------------------------------------------------------------------------------------------------------------------------------------------------------------------------------------------------|-------------------------------------------------------------------------------------|--|--|--|--|--|--|--|--|
| 4  | Consulting fees                                                                                              | <input checked="" type="checkbox"/> <b>None</b><br><table border="1"> <tr><td></td><td></td></tr> <tr><td></td><td></td></tr> <tr><td></td><td></td></tr> <tr><td></td><td></td></tr> </table> |                                                                                     |  |  |  |  |  |  |  |  |
|    |                                                                                                              |                                                                                                                                                                                                |                                                                                     |  |  |  |  |  |  |  |  |
|    |                                                                                                              |                                                                                                                                                                                                |                                                                                     |  |  |  |  |  |  |  |  |
|    |                                                                                                              |                                                                                                                                                                                                |                                                                                     |  |  |  |  |  |  |  |  |
|    |                                                                                                              |                                                                                                                                                                                                |                                                                                     |  |  |  |  |  |  |  |  |
| 5  | Payment or honoraria for lectures, presentations, speakers bureaus, manuscript writing or educational events | <input checked="" type="checkbox"/> <b>None</b><br><table border="1"> <tr><td></td><td></td></tr> <tr><td></td><td></td></tr> <tr><td></td><td></td></tr> </table>                             |                                                                                     |  |  |  |  |  |  |  |  |
|    |                                                                                                              |                                                                                                                                                                                                |                                                                                     |  |  |  |  |  |  |  |  |
|    |                                                                                                              |                                                                                                                                                                                                |                                                                                     |  |  |  |  |  |  |  |  |
|    |                                                                                                              |                                                                                                                                                                                                |                                                                                     |  |  |  |  |  |  |  |  |
| 6  | Payment for expert testimony                                                                                 | <input checked="" type="checkbox"/> <b>None</b><br><table border="1"> <tr><td></td><td></td></tr> <tr><td></td><td></td></tr> <tr><td></td><td></td></tr> </table>                             |                                                                                     |  |  |  |  |  |  |  |  |
|    |                                                                                                              |                                                                                                                                                                                                |                                                                                     |  |  |  |  |  |  |  |  |
|    |                                                                                                              |                                                                                                                                                                                                |                                                                                     |  |  |  |  |  |  |  |  |
|    |                                                                                                              |                                                                                                                                                                                                |                                                                                     |  |  |  |  |  |  |  |  |
| 7  | Support for attending meetings and/or travel                                                                 | <input checked="" type="checkbox"/> <b>None</b><br><table border="1"> <tr><td></td><td></td></tr> <tr><td></td><td></td></tr> <tr><td></td><td></td></tr> </table>                             |                                                                                     |  |  |  |  |  |  |  |  |
|    |                                                                                                              |                                                                                                                                                                                                |                                                                                     |  |  |  |  |  |  |  |  |
|    |                                                                                                              |                                                                                                                                                                                                |                                                                                     |  |  |  |  |  |  |  |  |
|    |                                                                                                              |                                                                                                                                                                                                |                                                                                     |  |  |  |  |  |  |  |  |
| 8  | Patents planned, issued or pending                                                                           | <input checked="" type="checkbox"/> <b>None</b><br><table border="1"> <tr><td></td><td></td></tr> <tr><td></td><td></td></tr> <tr><td></td><td></td></tr> </table>                             |                                                                                     |  |  |  |  |  |  |  |  |
|    |                                                                                                              |                                                                                                                                                                                                |                                                                                     |  |  |  |  |  |  |  |  |
|    |                                                                                                              |                                                                                                                                                                                                |                                                                                     |  |  |  |  |  |  |  |  |
|    |                                                                                                              |                                                                                                                                                                                                |                                                                                     |  |  |  |  |  |  |  |  |
| 9  | Participation on a Data Safety Monitoring Board or Advisory Board                                            | <input checked="" type="checkbox"/> <b>None</b><br><table border="1"> <tr><td></td><td></td></tr> <tr><td></td><td></td></tr> <tr><td></td><td></td></tr> </table>                             |                                                                                     |  |  |  |  |  |  |  |  |
|    |                                                                                                              |                                                                                                                                                                                                |                                                                                     |  |  |  |  |  |  |  |  |
|    |                                                                                                              |                                                                                                                                                                                                |                                                                                     |  |  |  |  |  |  |  |  |
|    |                                                                                                              |                                                                                                                                                                                                |                                                                                     |  |  |  |  |  |  |  |  |
| 10 | Leadership or fiduciary role in other board, society, committee or advocacy group, paid or unpaid            | <input checked="" type="checkbox"/> <b>None</b><br><table border="1"> <tr><td></td><td></td></tr> <tr><td></td><td></td></tr> <tr><td></td><td></td></tr> </table>                             |                                                                                     |  |  |  |  |  |  |  |  |
|    |                                                                                                              |                                                                                                                                                                                                |                                                                                     |  |  |  |  |  |  |  |  |
|    |                                                                                                              |                                                                                                                                                                                                |                                                                                     |  |  |  |  |  |  |  |  |
|    |                                                                                                              |                                                                                                                                                                                                |                                                                                     |  |  |  |  |  |  |  |  |



|           |                                                                                  | Name all entities with whom you have this relationship or indicate none (add rows as needed)                                                                                                          | Specifications/Comments (e.g., if payments were made to you or to your institution) |  |  |  |  |  |  |
|-----------|----------------------------------------------------------------------------------|-------------------------------------------------------------------------------------------------------------------------------------------------------------------------------------------------------|-------------------------------------------------------------------------------------|--|--|--|--|--|--|
| <b>11</b> | Stock or stock options                                                           | <input checked="" type="checkbox"/> <b>None</b> <table border="1" style="width: 100%; margin-top: 5px;"> <tr><td></td><td></td></tr> <tr><td></td><td></td></tr> <tr><td></td><td></td></tr> </table> |                                                                                     |  |  |  |  |  |  |
|           |                                                                                  |                                                                                                                                                                                                       |                                                                                     |  |  |  |  |  |  |
|           |                                                                                  |                                                                                                                                                                                                       |                                                                                     |  |  |  |  |  |  |
|           |                                                                                  |                                                                                                                                                                                                       |                                                                                     |  |  |  |  |  |  |
| <b>12</b> | Receipt of equipment, materials, drugs, medical writing, gifts or other services | <input checked="" type="checkbox"/> <b>None</b> <table border="1" style="width: 100%; margin-top: 5px;"> <tr><td></td><td></td></tr> <tr><td></td><td></td></tr> <tr><td></td><td></td></tr> </table> |                                                                                     |  |  |  |  |  |  |
|           |                                                                                  |                                                                                                                                                                                                       |                                                                                     |  |  |  |  |  |  |
|           |                                                                                  |                                                                                                                                                                                                       |                                                                                     |  |  |  |  |  |  |
|           |                                                                                  |                                                                                                                                                                                                       |                                                                                     |  |  |  |  |  |  |
| <b>13</b> | Other financial or non-financial interests                                       | <input checked="" type="checkbox"/> <b>None</b> <table border="1" style="width: 100%; margin-top: 5px;"> <tr><td></td><td></td></tr> <tr><td></td><td></td></tr> <tr><td></td><td></td></tr> </table> |                                                                                     |  |  |  |  |  |  |
|           |                                                                                  |                                                                                                                                                                                                       |                                                                                     |  |  |  |  |  |  |
|           |                                                                                  |                                                                                                                                                                                                       |                                                                                     |  |  |  |  |  |  |
|           |                                                                                  |                                                                                                                                                                                                       |                                                                                     |  |  |  |  |  |  |

**Please place an "X" next to the following statement to indicate your agreement:**

☒ I certify that I have answered every question and have not altered the wording of any of the questions on this form.

# ICMJE DISCLOSURE FORM

**Date:** 9/29/2022

**Your Name:** Stavros Papachristos

**Manuscript Title:** ClinCirc identifies alterations of the circadian peripheral oscillator in critical care patients

**Manuscript Number (if known):** 162775-JCI-CMED-1

In the interest of transparency, we ask you to disclose all relationships/activities/interests listed below that are related to the content of your manuscript. "Related" means any relation with for-profit or not-for-profit third parties whose interests may be affected by the content of the manuscript. Disclosure represents a commitment to transparency and does not necessarily indicate a bias. If you are in doubt about whether to list a relationship/activity/interest, it is preferable that you do so.

The author's relationships/activities/interests should be defined broadly. For example, if your manuscript pertains to the epidemiology of hypertension, you should declare all relationships with manufacturers of antihypertensive medication, even if that medication is not mentioned in the manuscript.

In item #1 below, report all support for the work reported in this manuscript without time limit. For all other items, the time frame for disclosure is the past 36 months.

|                                                           | Name all entities with whom you have this relationship or indicate none (add rows as needed)                                                                                   | Specifications/Comments (e.g., if payments were made to you or to your institution)                                                                                                                                              |                   |        |  |  |  |                                           |
|-----------------------------------------------------------|--------------------------------------------------------------------------------------------------------------------------------------------------------------------------------|----------------------------------------------------------------------------------------------------------------------------------------------------------------------------------------------------------------------------------|-------------------|--------|--|--|--|-------------------------------------------|
| <b>Time frame: Since the initial planning of the work</b> |                                                                                                                                                                                |                                                                                                                                                                                                                                  |                   |        |  |  |  |                                           |
| <b>1</b>                                                  | All support for the present manuscript (e.g., funding, provision of study materials, medical writing, article processing charges, etc.)<br><b>No time limit for this item.</b> | <input type="checkbox"/> <b>None</b><br><table border="1"> <tr> <td>Kidneys for Life.</td> <td>Grant.</td> </tr> <tr> <td></td> <td></td> </tr> <tr> <td></td> <td>Click the tab key to add additional rows.</td> </tr> </table> | Kidneys for Life. | Grant. |  |  |  | Click the tab key to add additional rows. |
| Kidneys for Life.                                         | Grant.                                                                                                                                                                         |                                                                                                                                                                                                                                  |                   |        |  |  |  |                                           |
|                                                           |                                                                                                                                                                                |                                                                                                                                                                                                                                  |                   |        |  |  |  |                                           |
|                                                           | Click the tab key to add additional rows.                                                                                                                                      |                                                                                                                                                                                                                                  |                   |        |  |  |  |                                           |
| <b>Time frame: past 36 months</b>                         |                                                                                                                                                                                |                                                                                                                                                                                                                                  |                   |        |  |  |  |                                           |
| <b>2</b>                                                  | Grants or contracts from any entity (if not indicated in item #1 above).                                                                                                       | <input checked="" type="checkbox"/> <b>None</b><br><table border="1"> <tr> <td></td> <td></td> </tr> <tr> <td></td> <td></td> </tr> <tr> <td></td> <td></td> </tr> </table>                                                      |                   |        |  |  |  |                                           |
|                                                           |                                                                                                                                                                                |                                                                                                                                                                                                                                  |                   |        |  |  |  |                                           |
|                                                           |                                                                                                                                                                                |                                                                                                                                                                                                                                  |                   |        |  |  |  |                                           |
|                                                           |                                                                                                                                                                                |                                                                                                                                                                                                                                  |                   |        |  |  |  |                                           |
| <b>3</b>                                                  | Royalties or licenses                                                                                                                                                          | <input checked="" type="checkbox"/> <b>None</b><br><table border="1"> <tr> <td></td> <td></td> </tr> <tr> <td></td> <td></td> </tr> <tr> <td></td> <td></td> </tr> </table>                                                      |                   |        |  |  |  |                                           |
|                                                           |                                                                                                                                                                                |                                                                                                                                                                                                                                  |                   |        |  |  |  |                                           |
|                                                           |                                                                                                                                                                                |                                                                                                                                                                                                                                  |                   |        |  |  |  |                                           |
|                                                           |                                                                                                                                                                                |                                                                                                                                                                                                                                  |                   |        |  |  |  |                                           |

|    |                                                                                                              | Name all entities with whom you have this relationship or indicate none (add rows as needed)                                                                                                   | Specifications/Comments (e.g., if payments were made to you or to your institution) |  |  |  |  |  |  |  |  |
|----|--------------------------------------------------------------------------------------------------------------|------------------------------------------------------------------------------------------------------------------------------------------------------------------------------------------------|-------------------------------------------------------------------------------------|--|--|--|--|--|--|--|--|
| 4  | Consulting fees                                                                                              | <input checked="" type="checkbox"/> <b>None</b><br><table border="1"> <tr><td></td><td></td></tr> <tr><td></td><td></td></tr> <tr><td></td><td></td></tr> <tr><td></td><td></td></tr> </table> |                                                                                     |  |  |  |  |  |  |  |  |
|    |                                                                                                              |                                                                                                                                                                                                |                                                                                     |  |  |  |  |  |  |  |  |
|    |                                                                                                              |                                                                                                                                                                                                |                                                                                     |  |  |  |  |  |  |  |  |
|    |                                                                                                              |                                                                                                                                                                                                |                                                                                     |  |  |  |  |  |  |  |  |
|    |                                                                                                              |                                                                                                                                                                                                |                                                                                     |  |  |  |  |  |  |  |  |
| 5  | Payment or honoraria for lectures, presentations, speakers bureaus, manuscript writing or educational events | <input checked="" type="checkbox"/> <b>None</b><br><table border="1"> <tr><td></td><td></td></tr> <tr><td></td><td></td></tr> <tr><td></td><td></td></tr> </table>                             |                                                                                     |  |  |  |  |  |  |  |  |
|    |                                                                                                              |                                                                                                                                                                                                |                                                                                     |  |  |  |  |  |  |  |  |
|    |                                                                                                              |                                                                                                                                                                                                |                                                                                     |  |  |  |  |  |  |  |  |
|    |                                                                                                              |                                                                                                                                                                                                |                                                                                     |  |  |  |  |  |  |  |  |
| 6  | Payment for expert testimony                                                                                 | <input checked="" type="checkbox"/> <b>None</b><br><table border="1"> <tr><td></td><td></td></tr> <tr><td></td><td></td></tr> <tr><td></td><td></td></tr> </table>                             |                                                                                     |  |  |  |  |  |  |  |  |
|    |                                                                                                              |                                                                                                                                                                                                |                                                                                     |  |  |  |  |  |  |  |  |
|    |                                                                                                              |                                                                                                                                                                                                |                                                                                     |  |  |  |  |  |  |  |  |
|    |                                                                                                              |                                                                                                                                                                                                |                                                                                     |  |  |  |  |  |  |  |  |
| 7  | Support for attending meetings and/or travel                                                                 | <input checked="" type="checkbox"/> <b>None</b><br><table border="1"> <tr><td></td><td></td></tr> <tr><td></td><td></td></tr> <tr><td></td><td></td></tr> </table>                             |                                                                                     |  |  |  |  |  |  |  |  |
|    |                                                                                                              |                                                                                                                                                                                                |                                                                                     |  |  |  |  |  |  |  |  |
|    |                                                                                                              |                                                                                                                                                                                                |                                                                                     |  |  |  |  |  |  |  |  |
|    |                                                                                                              |                                                                                                                                                                                                |                                                                                     |  |  |  |  |  |  |  |  |
| 8  | Patents planned, issued or pending                                                                           | <input checked="" type="checkbox"/> <b>None</b><br><table border="1"> <tr><td></td><td></td></tr> <tr><td></td><td></td></tr> <tr><td></td><td></td></tr> </table>                             |                                                                                     |  |  |  |  |  |  |  |  |
|    |                                                                                                              |                                                                                                                                                                                                |                                                                                     |  |  |  |  |  |  |  |  |
|    |                                                                                                              |                                                                                                                                                                                                |                                                                                     |  |  |  |  |  |  |  |  |
|    |                                                                                                              |                                                                                                                                                                                                |                                                                                     |  |  |  |  |  |  |  |  |
| 9  | Participation on a Data Safety Monitoring Board or Advisory Board                                            | <input checked="" type="checkbox"/> <b>None</b><br><table border="1"> <tr><td></td><td></td></tr> <tr><td></td><td></td></tr> <tr><td></td><td></td></tr> </table>                             |                                                                                     |  |  |  |  |  |  |  |  |
|    |                                                                                                              |                                                                                                                                                                                                |                                                                                     |  |  |  |  |  |  |  |  |
|    |                                                                                                              |                                                                                                                                                                                                |                                                                                     |  |  |  |  |  |  |  |  |
|    |                                                                                                              |                                                                                                                                                                                                |                                                                                     |  |  |  |  |  |  |  |  |
| 10 | Leadership or fiduciary role in other board, society, committee or advocacy group, paid or unpaid            | <input checked="" type="checkbox"/> <b>None</b><br><table border="1"> <tr><td></td><td></td></tr> <tr><td></td><td></td></tr> <tr><td></td><td></td></tr> </table>                             |                                                                                     |  |  |  |  |  |  |  |  |
|    |                                                                                                              |                                                                                                                                                                                                |                                                                                     |  |  |  |  |  |  |  |  |
|    |                                                                                                              |                                                                                                                                                                                                |                                                                                     |  |  |  |  |  |  |  |  |
|    |                                                                                                              |                                                                                                                                                                                                |                                                                                     |  |  |  |  |  |  |  |  |

|           |                                                                                  | Name all entities with whom you have this relationship or indicate none (add rows as needed)                                                                                                                                                                                                                                                        | Specifications/Comments (e.g., if payments were made to you or to your institution) |  |  |  |  |  |  |
|-----------|----------------------------------------------------------------------------------|-----------------------------------------------------------------------------------------------------------------------------------------------------------------------------------------------------------------------------------------------------------------------------------------------------------------------------------------------------|-------------------------------------------------------------------------------------|--|--|--|--|--|--|
| <b>11</b> | Stock or stock options                                                           | <input checked="" type="checkbox"/> <b>None</b> <table border="1" style="width: 100%; border-collapse: collapse;"> <tr><td style="height: 20px;"></td><td style="height: 20px;"></td></tr> <tr><td style="height: 20px;"></td><td style="height: 20px;"></td></tr> <tr><td style="height: 20px;"></td><td style="height: 20px;"></td></tr> </table> |                                                                                     |  |  |  |  |  |  |
|           |                                                                                  |                                                                                                                                                                                                                                                                                                                                                     |                                                                                     |  |  |  |  |  |  |
|           |                                                                                  |                                                                                                                                                                                                                                                                                                                                                     |                                                                                     |  |  |  |  |  |  |
|           |                                                                                  |                                                                                                                                                                                                                                                                                                                                                     |                                                                                     |  |  |  |  |  |  |
| <b>12</b> | Receipt of equipment, materials, drugs, medical writing, gifts or other services | <input checked="" type="checkbox"/> <b>None</b> <table border="1" style="width: 100%; border-collapse: collapse;"> <tr><td style="height: 20px;"></td><td style="height: 20px;"></td></tr> <tr><td style="height: 20px;"></td><td style="height: 20px;"></td></tr> <tr><td style="height: 20px;"></td><td style="height: 20px;"></td></tr> </table> |                                                                                     |  |  |  |  |  |  |
|           |                                                                                  |                                                                                                                                                                                                                                                                                                                                                     |                                                                                     |  |  |  |  |  |  |
|           |                                                                                  |                                                                                                                                                                                                                                                                                                                                                     |                                                                                     |  |  |  |  |  |  |
|           |                                                                                  |                                                                                                                                                                                                                                                                                                                                                     |                                                                                     |  |  |  |  |  |  |
| <b>13</b> | Other financial or non-financial interests                                       | <input checked="" type="checkbox"/> <b>None</b> <table border="1" style="width: 100%; border-collapse: collapse;"> <tr><td style="height: 20px;"></td><td style="height: 20px;"></td></tr> <tr><td style="height: 20px;"></td><td style="height: 20px;"></td></tr> <tr><td style="height: 20px;"></td><td style="height: 20px;"></td></tr> </table> |                                                                                     |  |  |  |  |  |  |
|           |                                                                                  |                                                                                                                                                                                                                                                                                                                                                     |                                                                                     |  |  |  |  |  |  |
|           |                                                                                  |                                                                                                                                                                                                                                                                                                                                                     |                                                                                     |  |  |  |  |  |  |
|           |                                                                                  |                                                                                                                                                                                                                                                                                                                                                     |                                                                                     |  |  |  |  |  |  |

**Please place an "X" next to the following statement to indicate your agreement:**

☒ I certify that I have answered every question and have not altered the wording of any of the questions on this form.

## ICMJE DISCLOSURE FORM

**Date:** 9/28/2022

**Your Name:** Thomas Springthorpe

**Manuscript Title:** ClinCirc identifies alterations of the circadian peripheral oscillator in critical care patients

**Manuscript Number (if known):** 162775-JCI-CMED-1

In the interest of transparency, we ask you to disclose all relationships/activities/interests listed below that are related to the content of your manuscript. "Related" means any relation with for-profit or not-for-profit third parties whose interests may be affected by the content of the manuscript. Disclosure represents a commitment to transparency and does not necessarily indicate a bias. If you are in doubt about whether to list a relationship/activity/interest, it is preferable that you do so.

The author's relationships/activities/interests should be defined broadly. For example, if your manuscript pertains to the epidemiology of hypertension, you should declare all relationships with manufacturers of antihypertensive medication, even if that medication is not mentioned in the manuscript.

In item #1 below, report all support for the work reported in this manuscript without time limit. For all other items, the time frame for disclosure is the past 36 months.

|                                                           |                                                                                                                                                                                | Name all entities with whom you have this relationship or indicate none (add rows as needed)                                                                                                                                                                                                                                                                                                       | Specifications/Comments (e.g., if payments were made to you or to your institution) |  |  |  |  |  |  |
|-----------------------------------------------------------|--------------------------------------------------------------------------------------------------------------------------------------------------------------------------------|----------------------------------------------------------------------------------------------------------------------------------------------------------------------------------------------------------------------------------------------------------------------------------------------------------------------------------------------------------------------------------------------------|-------------------------------------------------------------------------------------|--|--|--|--|--|--|
| <b>Time frame: Since the initial planning of the work</b> |                                                                                                                                                                                |                                                                                                                                                                                                                                                                                                                                                                                                    |                                                                                     |  |  |  |  |  |  |
| <b>1</b>                                                  | All support for the present manuscript (e.g., funding, provision of study materials, medical writing, article processing charges, etc.)<br><b>No time limit for this item.</b> | <div style="display: flex; align-items: center;"> <input checked="" type="checkbox"/> <b>None</b> </div> <table border="1" style="width: 100%; margin-top: 5px;"> <tr><td style="height: 20px;"></td><td style="height: 20px;"></td></tr> <tr><td style="height: 20px;"></td><td style="height: 20px;"></td></tr> <tr><td style="height: 20px;"></td><td style="height: 20px;"></td></tr> </table> |                                                                                     |  |  |  |  |  |  |
|                                                           |                                                                                                                                                                                |                                                                                                                                                                                                                                                                                                                                                                                                    |                                                                                     |  |  |  |  |  |  |
|                                                           |                                                                                                                                                                                |                                                                                                                                                                                                                                                                                                                                                                                                    |                                                                                     |  |  |  |  |  |  |
|                                                           |                                                                                                                                                                                |                                                                                                                                                                                                                                                                                                                                                                                                    |                                                                                     |  |  |  |  |  |  |
| <b>Time frame: past 36 months</b>                         |                                                                                                                                                                                |                                                                                                                                                                                                                                                                                                                                                                                                    |                                                                                     |  |  |  |  |  |  |
| <b>2</b>                                                  | Grants or contracts from any entity (if not indicated in item #1 above).                                                                                                       | <div style="display: flex; align-items: center;"> <input checked="" type="checkbox"/> <b>None</b> </div> <table border="1" style="width: 100%; margin-top: 5px;"> <tr><td style="height: 20px;"></td><td style="height: 20px;"></td></tr> <tr><td style="height: 20px;"></td><td style="height: 20px;"></td></tr> <tr><td style="height: 20px;"></td><td style="height: 20px;"></td></tr> </table> |                                                                                     |  |  |  |  |  |  |
|                                                           |                                                                                                                                                                                |                                                                                                                                                                                                                                                                                                                                                                                                    |                                                                                     |  |  |  |  |  |  |
|                                                           |                                                                                                                                                                                |                                                                                                                                                                                                                                                                                                                                                                                                    |                                                                                     |  |  |  |  |  |  |
|                                                           |                                                                                                                                                                                |                                                                                                                                                                                                                                                                                                                                                                                                    |                                                                                     |  |  |  |  |  |  |
| <b>3</b>                                                  | Royalties or licenses                                                                                                                                                          | <div style="display: flex; align-items: center;"> <input checked="" type="checkbox"/> <b>None</b> </div> <table border="1" style="width: 100%; margin-top: 5px;"> <tr><td style="height: 20px;"></td><td style="height: 20px;"></td></tr> <tr><td style="height: 20px;"></td><td style="height: 20px;"></td></tr> <tr><td style="height: 20px;"></td><td style="height: 20px;"></td></tr> </table> |                                                                                     |  |  |  |  |  |  |
|                                                           |                                                                                                                                                                                |                                                                                                                                                                                                                                                                                                                                                                                                    |                                                                                     |  |  |  |  |  |  |
|                                                           |                                                                                                                                                                                |                                                                                                                                                                                                                                                                                                                                                                                                    |                                                                                     |  |  |  |  |  |  |
|                                                           |                                                                                                                                                                                |                                                                                                                                                                                                                                                                                                                                                                                                    |                                                                                     |  |  |  |  |  |  |

|    |                                                                                                              | Name all entities with whom you have this relationship or indicate none (add rows as needed)                                                                                                   | Specifications/Comments (e.g., if payments were made to you or to your institution) |  |  |  |  |  |  |  |  |
|----|--------------------------------------------------------------------------------------------------------------|------------------------------------------------------------------------------------------------------------------------------------------------------------------------------------------------|-------------------------------------------------------------------------------------|--|--|--|--|--|--|--|--|
| 4  | Consulting fees                                                                                              | <input checked="" type="checkbox"/> <b>None</b><br><table border="1"> <tr><td></td><td></td></tr> <tr><td></td><td></td></tr> <tr><td></td><td></td></tr> <tr><td></td><td></td></tr> </table> |                                                                                     |  |  |  |  |  |  |  |  |
|    |                                                                                                              |                                                                                                                                                                                                |                                                                                     |  |  |  |  |  |  |  |  |
|    |                                                                                                              |                                                                                                                                                                                                |                                                                                     |  |  |  |  |  |  |  |  |
|    |                                                                                                              |                                                                                                                                                                                                |                                                                                     |  |  |  |  |  |  |  |  |
|    |                                                                                                              |                                                                                                                                                                                                |                                                                                     |  |  |  |  |  |  |  |  |
| 5  | Payment or honoraria for lectures, presentations, speakers bureaus, manuscript writing or educational events | <input checked="" type="checkbox"/> <b>None</b><br><table border="1"> <tr><td></td><td></td></tr> <tr><td></td><td></td></tr> <tr><td></td><td></td></tr> </table>                             |                                                                                     |  |  |  |  |  |  |  |  |
|    |                                                                                                              |                                                                                                                                                                                                |                                                                                     |  |  |  |  |  |  |  |  |
|    |                                                                                                              |                                                                                                                                                                                                |                                                                                     |  |  |  |  |  |  |  |  |
|    |                                                                                                              |                                                                                                                                                                                                |                                                                                     |  |  |  |  |  |  |  |  |
| 6  | Payment for expert testimony                                                                                 | <input checked="" type="checkbox"/> <b>None</b><br><table border="1"> <tr><td></td><td></td></tr> <tr><td></td><td></td></tr> <tr><td></td><td></td></tr> </table>                             |                                                                                     |  |  |  |  |  |  |  |  |
|    |                                                                                                              |                                                                                                                                                                                                |                                                                                     |  |  |  |  |  |  |  |  |
|    |                                                                                                              |                                                                                                                                                                                                |                                                                                     |  |  |  |  |  |  |  |  |
|    |                                                                                                              |                                                                                                                                                                                                |                                                                                     |  |  |  |  |  |  |  |  |
| 7  | Support for attending meetings and/or travel                                                                 | <input checked="" type="checkbox"/> <b>None</b><br><table border="1"> <tr><td></td><td></td></tr> <tr><td></td><td></td></tr> <tr><td></td><td></td></tr> </table>                             |                                                                                     |  |  |  |  |  |  |  |  |
|    |                                                                                                              |                                                                                                                                                                                                |                                                                                     |  |  |  |  |  |  |  |  |
|    |                                                                                                              |                                                                                                                                                                                                |                                                                                     |  |  |  |  |  |  |  |  |
|    |                                                                                                              |                                                                                                                                                                                                |                                                                                     |  |  |  |  |  |  |  |  |
| 8  | Patents planned, issued or pending                                                                           | <input checked="" type="checkbox"/> <b>None</b><br><table border="1"> <tr><td></td><td></td></tr> <tr><td></td><td></td></tr> <tr><td></td><td></td></tr> </table>                             |                                                                                     |  |  |  |  |  |  |  |  |
|    |                                                                                                              |                                                                                                                                                                                                |                                                                                     |  |  |  |  |  |  |  |  |
|    |                                                                                                              |                                                                                                                                                                                                |                                                                                     |  |  |  |  |  |  |  |  |
|    |                                                                                                              |                                                                                                                                                                                                |                                                                                     |  |  |  |  |  |  |  |  |
| 9  | Participation on a Data Safety Monitoring Board or Advisory Board                                            | <input checked="" type="checkbox"/> <b>None</b><br><table border="1"> <tr><td></td><td></td></tr> <tr><td></td><td></td></tr> <tr><td></td><td></td></tr> </table>                             |                                                                                     |  |  |  |  |  |  |  |  |
|    |                                                                                                              |                                                                                                                                                                                                |                                                                                     |  |  |  |  |  |  |  |  |
|    |                                                                                                              |                                                                                                                                                                                                |                                                                                     |  |  |  |  |  |  |  |  |
|    |                                                                                                              |                                                                                                                                                                                                |                                                                                     |  |  |  |  |  |  |  |  |
| 10 | Leadership or fiduciary role in other board, society, committee or advocacy group, paid or unpaid            | <input checked="" type="checkbox"/> <b>None</b><br><table border="1"> <tr><td></td><td></td></tr> <tr><td></td><td></td></tr> <tr><td></td><td></td></tr> </table>                             |                                                                                     |  |  |  |  |  |  |  |  |
|    |                                                                                                              |                                                                                                                                                                                                |                                                                                     |  |  |  |  |  |  |  |  |
|    |                                                                                                              |                                                                                                                                                                                                |                                                                                     |  |  |  |  |  |  |  |  |
|    |                                                                                                              |                                                                                                                                                                                                |                                                                                     |  |  |  |  |  |  |  |  |

|           |                                                                                  | Name all entities with whom you have this relationship or indicate none (add rows as needed)                                                                                                 | Specifications/Comments (e.g., if payments were made to you or to your institution) |  |  |  |  |  |  |
|-----------|----------------------------------------------------------------------------------|----------------------------------------------------------------------------------------------------------------------------------------------------------------------------------------------|-------------------------------------------------------------------------------------|--|--|--|--|--|--|
| <b>11</b> | Stock or stock options                                                           | <input checked="" type="checkbox"/> <b>None</b> <table border="1" data-bbox="386 258 1516 359"> <tr><td></td><td></td></tr> <tr><td></td><td></td></tr> <tr><td></td><td></td></tr> </table> |                                                                                     |  |  |  |  |  |  |
|           |                                                                                  |                                                                                                                                                                                              |                                                                                     |  |  |  |  |  |  |
|           |                                                                                  |                                                                                                                                                                                              |                                                                                     |  |  |  |  |  |  |
|           |                                                                                  |                                                                                                                                                                                              |                                                                                     |  |  |  |  |  |  |
| <b>12</b> | Receipt of equipment, materials, drugs, medical writing, gifts or other services | <input checked="" type="checkbox"/> <b>None</b> <table border="1" data-bbox="386 476 1516 577"> <tr><td></td><td></td></tr> <tr><td></td><td></td></tr> <tr><td></td><td></td></tr> </table> |                                                                                     |  |  |  |  |  |  |
|           |                                                                                  |                                                                                                                                                                                              |                                                                                     |  |  |  |  |  |  |
|           |                                                                                  |                                                                                                                                                                                              |                                                                                     |  |  |  |  |  |  |
|           |                                                                                  |                                                                                                                                                                                              |                                                                                     |  |  |  |  |  |  |
| <b>13</b> | Other financial or non-financial interests                                       | <input checked="" type="checkbox"/> <b>None</b> <table border="1" data-bbox="386 690 1516 791"> <tr><td></td><td></td></tr> <tr><td></td><td></td></tr> <tr><td></td><td></td></tr> </table> |                                                                                     |  |  |  |  |  |  |
|           |                                                                                  |                                                                                                                                                                                              |                                                                                     |  |  |  |  |  |  |
|           |                                                                                  |                                                                                                                                                                                              |                                                                                     |  |  |  |  |  |  |
|           |                                                                                  |                                                                                                                                                                                              |                                                                                     |  |  |  |  |  |  |

**Please place an "X" next to the following statement to indicate your agreement:**

☒ I certify that I have answered every question and have not altered the wording of any of the questions on this form.

# ICMJE DISCLOSURE FORM

**Date:** 9/22/2022

**Your Name:** David van Dellen

**Manuscript Title:** ClinCirc identifies alterations of the circadian peripheral oscillator in critical care patients

**Manuscript Number (if known):** 162775-JCI-CMED-1

In the interest of transparency, we ask you to disclose all relationships/activities/interests listed below that are related to the content of your manuscript. "Related" means any relation with for-profit or not-for-profit third parties whose interests may be affected by the content of the manuscript. Disclosure represents a commitment to transparency and does not necessarily indicate a bias. If you are in doubt about whether to list a relationship/activity/interest, it is preferable that you do so.

The author's relationships/activities/interests should be defined broadly. For example, if your manuscript pertains to the epidemiology of hypertension, you should declare all relationships with manufacturers of antihypertensive medication, even if that medication is not mentioned in the manuscript.

In item #1 below, report all support for the work reported in this manuscript without time limit. For all other items, the time frame for disclosure is the past 36 months.

|                                                           | Name all entities with whom you have this relationship or indicate none (add rows as needed)                                                                                   | Specifications/Comments (e.g., if payments were made to you or to your institution)                                                                                                                         |  |  |  |  |  |                                           |
|-----------------------------------------------------------|--------------------------------------------------------------------------------------------------------------------------------------------------------------------------------|-------------------------------------------------------------------------------------------------------------------------------------------------------------------------------------------------------------|--|--|--|--|--|-------------------------------------------|
| <b>Time frame: Since the initial planning of the work</b> |                                                                                                                                                                                |                                                                                                                                                                                                             |  |  |  |  |  |                                           |
| <b>1</b>                                                  | All support for the present manuscript (e.g., funding, provision of study materials, medical writing, article processing charges, etc.)<br><b>No time limit for this item.</b> | <input checked="" type="checkbox"/> <b>None</b><br><table border="1"> <tr><td></td><td></td></tr> <tr><td></td><td></td></tr> <tr><td></td><td>Click the tab key to add additional rows.</td></tr> </table> |  |  |  |  |  | Click the tab key to add additional rows. |
|                                                           |                                                                                                                                                                                |                                                                                                                                                                                                             |  |  |  |  |  |                                           |
|                                                           |                                                                                                                                                                                |                                                                                                                                                                                                             |  |  |  |  |  |                                           |
|                                                           | Click the tab key to add additional rows.                                                                                                                                      |                                                                                                                                                                                                             |  |  |  |  |  |                                           |
| <b>Time frame: past 36 months</b>                         |                                                                                                                                                                                |                                                                                                                                                                                                             |  |  |  |  |  |                                           |
| <b>2</b>                                                  | Grants or contracts from any entity (if not indicated in item #1 above).                                                                                                       | <input checked="" type="checkbox"/> <b>None</b><br><table border="1"> <tr><td></td><td></td></tr> <tr><td></td><td></td></tr> <tr><td></td><td></td></tr> </table>                                          |  |  |  |  |  |                                           |
|                                                           |                                                                                                                                                                                |                                                                                                                                                                                                             |  |  |  |  |  |                                           |
|                                                           |                                                                                                                                                                                |                                                                                                                                                                                                             |  |  |  |  |  |                                           |
|                                                           |                                                                                                                                                                                |                                                                                                                                                                                                             |  |  |  |  |  |                                           |
| <b>3</b>                                                  | Royalties or licenses                                                                                                                                                          | <input checked="" type="checkbox"/> <b>None</b><br><table border="1"> <tr><td></td><td></td></tr> <tr><td></td><td></td></tr> <tr><td></td><td></td></tr> </table>                                          |  |  |  |  |  |                                           |
|                                                           |                                                                                                                                                                                |                                                                                                                                                                                                             |  |  |  |  |  |                                           |
|                                                           |                                                                                                                                                                                |                                                                                                                                                                                                             |  |  |  |  |  |                                           |
|                                                           |                                                                                                                                                                                |                                                                                                                                                                                                             |  |  |  |  |  |                                           |



|        |                                                                                                              | Name all entities with whom you have this relationship or indicate none (add rows as needed)                                                                                                                                                                                                                                                                                            | Specifications/Comments (e.g., if payments were made to you or to your institution) |        |                   |      |                   |      |                   |
|--------|--------------------------------------------------------------------------------------------------------------|-----------------------------------------------------------------------------------------------------------------------------------------------------------------------------------------------------------------------------------------------------------------------------------------------------------------------------------------------------------------------------------------|-------------------------------------------------------------------------------------|--------|-------------------|------|-------------------|------|-------------------|
| 4      | Consulting fees                                                                                              | <input checked="" type="checkbox"/> <b>None</b><br><table border="1" style="width: 100%; border-collapse: collapse;"> <tr> <td style="width: 50%; height: 20px;"></td> <td style="width: 50%; height: 20px;"></td> </tr> </table>                                                                                                                                                       |                                                                                     |        |                   |      |                   |      |                   |
|        |                                                                                                              |                                                                                                                                                                                                                                                                                                                                                                                         |                                                                                     |        |                   |      |                   |      |                   |
| 5      | Payment or honoraria for lectures, presentations, speakers bureaus, manuscript writing or educational events | <input type="checkbox"/> <b>None</b><br><table border="1" style="width: 100%; border-collapse: collapse;"> <tr> <td style="width: 50%;">Abbvie</td> <td style="width: 50%;">Personal payments</td> </tr> <tr> <td>Gore</td> <td>Personal payments</td> </tr> <tr> <td>Cook</td> <td>Personal payments</td> </tr> </table>                                                               |                                                                                     | Abbvie | Personal payments | Gore | Personal payments | Cook | Personal payments |
| Abbvie | Personal payments                                                                                            |                                                                                                                                                                                                                                                                                                                                                                                         |                                                                                     |        |                   |      |                   |      |                   |
| Gore   | Personal payments                                                                                            |                                                                                                                                                                                                                                                                                                                                                                                         |                                                                                     |        |                   |      |                   |      |                   |
| Cook   | Personal payments                                                                                            |                                                                                                                                                                                                                                                                                                                                                                                         |                                                                                     |        |                   |      |                   |      |                   |
| 6      | Payment for expert testimony                                                                                 | <input checked="" type="checkbox"/> <b>None</b><br><table border="1" style="width: 100%; border-collapse: collapse;"> <tr> <td style="width: 50%; height: 20px;"></td> <td style="width: 50%; height: 20px;"></td> </tr> <tr> <td style="height: 20px;"></td> <td style="height: 20px;"></td> </tr> <tr> <td style="height: 20px;"></td> <td style="height: 20px;"></td> </tr> </table> |                                                                                     |        |                   |      |                   |      |                   |
|        |                                                                                                              |                                                                                                                                                                                                                                                                                                                                                                                         |                                                                                     |        |                   |      |                   |      |                   |
|        |                                                                                                              |                                                                                                                                                                                                                                                                                                                                                                                         |                                                                                     |        |                   |      |                   |      |                   |
|        |                                                                                                              |                                                                                                                                                                                                                                                                                                                                                                                         |                                                                                     |        |                   |      |                   |      |                   |
| 7      | Support for attending meetings and/or travel                                                                 | <input checked="" type="checkbox"/> <b>None</b><br><table border="1" style="width: 100%; border-collapse: collapse;"> <tr> <td style="width: 50%; height: 20px;"></td> <td style="width: 50%; height: 20px;"></td> </tr> <tr> <td style="height: 20px;"></td> <td style="height: 20px;"></td> </tr> <tr> <td style="height: 20px;"></td> <td style="height: 20px;"></td> </tr> </table> |                                                                                     |        |                   |      |                   |      |                   |
|        |                                                                                                              |                                                                                                                                                                                                                                                                                                                                                                                         |                                                                                     |        |                   |      |                   |      |                   |
|        |                                                                                                              |                                                                                                                                                                                                                                                                                                                                                                                         |                                                                                     |        |                   |      |                   |      |                   |
|        |                                                                                                              |                                                                                                                                                                                                                                                                                                                                                                                         |                                                                                     |        |                   |      |                   |      |                   |
| 8      | Patents planned, issued or pending                                                                           | <input checked="" type="checkbox"/> <b>None</b><br><table border="1" style="width: 100%; border-collapse: collapse;"> <tr> <td style="width: 50%; height: 20px;"></td> <td style="width: 50%; height: 20px;"></td> </tr> <tr> <td style="height: 20px;"></td> <td style="height: 20px;"></td> </tr> <tr> <td style="height: 20px;"></td> <td style="height: 20px;"></td> </tr> </table> |                                                                                     |        |                   |      |                   |      |                   |
|        |                                                                                                              |                                                                                                                                                                                                                                                                                                                                                                                         |                                                                                     |        |                   |      |                   |      |                   |
|        |                                                                                                              |                                                                                                                                                                                                                                                                                                                                                                                         |                                                                                     |        |                   |      |                   |      |                   |
|        |                                                                                                              |                                                                                                                                                                                                                                                                                                                                                                                         |                                                                                     |        |                   |      |                   |      |                   |
| 9      | Participation on a Data Safety Monitoring Board or Advisory Board                                            | <input type="checkbox"/> <b>None</b><br><table border="1" style="width: 100%; border-collapse: collapse;"> <tr> <td style="width: 50%; height: 20px;"></td> <td style="width: 50%; height: 20px;"></td> </tr> <tr> <td style="height: 20px;"></td> <td style="height: 20px;"></td> </tr> <tr> <td style="height: 20px;"></td> <td style="height: 20px;"></td> </tr> </table>            |                                                                                     |        |                   |      |                   |      |                   |
|        |                                                                                                              |                                                                                                                                                                                                                                                                                                                                                                                         |                                                                                     |        |                   |      |                   |      |                   |
|        |                                                                                                              |                                                                                                                                                                                                                                                                                                                                                                                         |                                                                                     |        |                   |      |                   |      |                   |
|        |                                                                                                              |                                                                                                                                                                                                                                                                                                                                                                                         |                                                                                     |        |                   |      |                   |      |                   |
| 10     | Leadership or fiduciary role in other board, society, committee or advocacy group, paid or unpaid            | <input checked="" type="checkbox"/> <b>None</b><br><table border="1" style="width: 100%; border-collapse: collapse;"> <tr> <td style="width: 50%; height: 20px;"></td> <td style="width: 50%; height: 20px;"></td> </tr> <tr> <td style="height: 20px;"></td> <td style="height: 20px;"></td> </tr> <tr> <td style="height: 20px;"></td> <td style="height: 20px;"></td> </tr> </table> |                                                                                     |        |                   |      |                   |      |                   |
|        |                                                                                                              |                                                                                                                                                                                                                                                                                                                                                                                         |                                                                                     |        |                   |      |                   |      |                   |
|        |                                                                                                              |                                                                                                                                                                                                                                                                                                                                                                                         |                                                                                     |        |                   |      |                   |      |                   |
|        |                                                                                                              |                                                                                                                                                                                                                                                                                                                                                                                         |                                                                                     |        |                   |      |                   |      |                   |

|           |                                                                                  | Name all entities with whom you have this relationship or indicate none (add rows as needed)                                                                                                                                                                                                                                                        | Specifications/Comments (e.g., if payments were made to you or to your institution) |  |  |  |  |  |  |
|-----------|----------------------------------------------------------------------------------|-----------------------------------------------------------------------------------------------------------------------------------------------------------------------------------------------------------------------------------------------------------------------------------------------------------------------------------------------------|-------------------------------------------------------------------------------------|--|--|--|--|--|--|
| <b>11</b> | Stock or stock options                                                           | <input checked="" type="checkbox"/> <b>None</b> <table border="1" style="width: 100%; border-collapse: collapse;"> <tr><td style="height: 20px;"></td><td style="height: 20px;"></td></tr> <tr><td style="height: 20px;"></td><td style="height: 20px;"></td></tr> <tr><td style="height: 20px;"></td><td style="height: 20px;"></td></tr> </table> |                                                                                     |  |  |  |  |  |  |
|           |                                                                                  |                                                                                                                                                                                                                                                                                                                                                     |                                                                                     |  |  |  |  |  |  |
|           |                                                                                  |                                                                                                                                                                                                                                                                                                                                                     |                                                                                     |  |  |  |  |  |  |
|           |                                                                                  |                                                                                                                                                                                                                                                                                                                                                     |                                                                                     |  |  |  |  |  |  |
| <b>12</b> | Receipt of equipment, materials, drugs, medical writing, gifts or other services | <input checked="" type="checkbox"/> <b>None</b> <table border="1" style="width: 100%; border-collapse: collapse;"> <tr><td style="height: 20px;"></td><td style="height: 20px;"></td></tr> <tr><td style="height: 20px;"></td><td style="height: 20px;"></td></tr> <tr><td style="height: 20px;"></td><td style="height: 20px;"></td></tr> </table> |                                                                                     |  |  |  |  |  |  |
|           |                                                                                  |                                                                                                                                                                                                                                                                                                                                                     |                                                                                     |  |  |  |  |  |  |
|           |                                                                                  |                                                                                                                                                                                                                                                                                                                                                     |                                                                                     |  |  |  |  |  |  |
|           |                                                                                  |                                                                                                                                                                                                                                                                                                                                                     |                                                                                     |  |  |  |  |  |  |
| <b>13</b> | Other financial or non-financial interests                                       | <input checked="" type="checkbox"/> <b>None</b> <table border="1" style="width: 100%; border-collapse: collapse;"> <tr><td style="height: 20px;"></td><td style="height: 20px;"></td></tr> <tr><td style="height: 20px;"></td><td style="height: 20px;"></td></tr> <tr><td style="height: 20px;"></td><td style="height: 20px;"></td></tr> </table> |                                                                                     |  |  |  |  |  |  |
|           |                                                                                  |                                                                                                                                                                                                                                                                                                                                                     |                                                                                     |  |  |  |  |  |  |
|           |                                                                                  |                                                                                                                                                                                                                                                                                                                                                     |                                                                                     |  |  |  |  |  |  |
|           |                                                                                  |                                                                                                                                                                                                                                                                                                                                                     |                                                                                     |  |  |  |  |  |  |

**Please place an "X" next to the following statement to indicate your agreement:**

☒ I certify that I have answered every question and have not altered the wording of any of the questions on this form.

# ICMJE DISCLOSURE FORM

**Date:** 9/23/2022

**Your Name:** Julie Gibbs

**Manuscript Title:** ClinCirc identifies alterations of the circadian peripheral oscillator in critical care patients

**Manuscript Number (if known):** 162775-JCI-CMED-1

In the interest of transparency, we ask you to disclose all relationships/activities/interests listed below that are related to the content of your manuscript. "Related" means any relation with for-profit or not-for-profit third parties whose interests may be affected by the content of the manuscript. Disclosure represents a commitment to transparency and does not necessarily indicate a bias. If you are in doubt about whether to list a relationship/activity/interest, it is preferable that you do so.

The author's relationships/activities/interests should be defined broadly. For example, if your manuscript pertains to the epidemiology of hypertension, you should declare all relationships with manufacturers of antihypertensive medication, even if that medication is not mentioned in the manuscript.

In item #1 below, report all support for the work reported in this manuscript without time limit. For all other items, the time frame for disclosure is the past 36 months.

|                                                           | Name all entities with whom you have this relationship or indicate none (add rows as needed)                                                                                   | Specifications/Comments (e.g., if payments were made to you or to your institution)                                                                                                                         |  |  |  |  |  |                                           |
|-----------------------------------------------------------|--------------------------------------------------------------------------------------------------------------------------------------------------------------------------------|-------------------------------------------------------------------------------------------------------------------------------------------------------------------------------------------------------------|--|--|--|--|--|-------------------------------------------|
| <b>Time frame: Since the initial planning of the work</b> |                                                                                                                                                                                |                                                                                                                                                                                                             |  |  |  |  |  |                                           |
| <b>1</b>                                                  | All support for the present manuscript (e.g., funding, provision of study materials, medical writing, article processing charges, etc.)<br><b>No time limit for this item.</b> | <input checked="" type="checkbox"/> <b>None</b><br><table border="1"> <tr><td></td><td></td></tr> <tr><td></td><td></td></tr> <tr><td></td><td>Click the tab key to add additional rows.</td></tr> </table> |  |  |  |  |  | Click the tab key to add additional rows. |
|                                                           |                                                                                                                                                                                |                                                                                                                                                                                                             |  |  |  |  |  |                                           |
|                                                           |                                                                                                                                                                                |                                                                                                                                                                                                             |  |  |  |  |  |                                           |
|                                                           | Click the tab key to add additional rows.                                                                                                                                      |                                                                                                                                                                                                             |  |  |  |  |  |                                           |
| <b>Time frame: past 36 months</b>                         |                                                                                                                                                                                |                                                                                                                                                                                                             |  |  |  |  |  |                                           |
| <b>2</b>                                                  | Grants or contracts from any entity (if not indicated in item #1 above).                                                                                                       | <input checked="" type="checkbox"/> <b>None</b><br><table border="1"> <tr><td></td><td></td></tr> <tr><td></td><td></td></tr> <tr><td></td><td></td></tr> </table>                                          |  |  |  |  |  |                                           |
|                                                           |                                                                                                                                                                                |                                                                                                                                                                                                             |  |  |  |  |  |                                           |
|                                                           |                                                                                                                                                                                |                                                                                                                                                                                                             |  |  |  |  |  |                                           |
|                                                           |                                                                                                                                                                                |                                                                                                                                                                                                             |  |  |  |  |  |                                           |
| <b>3</b>                                                  | Royalties or licenses                                                                                                                                                          | <input checked="" type="checkbox"/> <b>None</b><br><table border="1"> <tr><td></td><td></td></tr> <tr><td></td><td></td></tr> <tr><td></td><td></td></tr> </table>                                          |  |  |  |  |  |                                           |
|                                                           |                                                                                                                                                                                |                                                                                                                                                                                                             |  |  |  |  |  |                                           |
|                                                           |                                                                                                                                                                                |                                                                                                                                                                                                             |  |  |  |  |  |                                           |
|                                                           |                                                                                                                                                                                |                                                                                                                                                                                                             |  |  |  |  |  |                                           |

|    |                                                                                                              | Name all entities with whom you have this relationship or indicate none (add rows as needed)                                                                                                   | Specifications/Comments (e.g., if payments were made to you or to your institution) |  |  |  |  |  |  |  |  |
|----|--------------------------------------------------------------------------------------------------------------|------------------------------------------------------------------------------------------------------------------------------------------------------------------------------------------------|-------------------------------------------------------------------------------------|--|--|--|--|--|--|--|--|
| 4  | Consulting fees                                                                                              | <input checked="" type="checkbox"/> <b>None</b><br><table border="1"> <tr><td></td><td></td></tr> <tr><td></td><td></td></tr> <tr><td></td><td></td></tr> <tr><td></td><td></td></tr> </table> |                                                                                     |  |  |  |  |  |  |  |  |
|    |                                                                                                              |                                                                                                                                                                                                |                                                                                     |  |  |  |  |  |  |  |  |
|    |                                                                                                              |                                                                                                                                                                                                |                                                                                     |  |  |  |  |  |  |  |  |
|    |                                                                                                              |                                                                                                                                                                                                |                                                                                     |  |  |  |  |  |  |  |  |
|    |                                                                                                              |                                                                                                                                                                                                |                                                                                     |  |  |  |  |  |  |  |  |
| 5  | Payment or honoraria for lectures, presentations, speakers bureaus, manuscript writing or educational events | <input checked="" type="checkbox"/> <b>None</b><br><table border="1"> <tr><td></td><td></td></tr> <tr><td></td><td></td></tr> <tr><td></td><td></td></tr> </table>                             |                                                                                     |  |  |  |  |  |  |  |  |
|    |                                                                                                              |                                                                                                                                                                                                |                                                                                     |  |  |  |  |  |  |  |  |
|    |                                                                                                              |                                                                                                                                                                                                |                                                                                     |  |  |  |  |  |  |  |  |
|    |                                                                                                              |                                                                                                                                                                                                |                                                                                     |  |  |  |  |  |  |  |  |
| 6  | Payment for expert testimony                                                                                 | <input checked="" type="checkbox"/> <b>None</b><br><table border="1"> <tr><td></td><td></td></tr> <tr><td></td><td></td></tr> <tr><td></td><td></td></tr> </table>                             |                                                                                     |  |  |  |  |  |  |  |  |
|    |                                                                                                              |                                                                                                                                                                                                |                                                                                     |  |  |  |  |  |  |  |  |
|    |                                                                                                              |                                                                                                                                                                                                |                                                                                     |  |  |  |  |  |  |  |  |
|    |                                                                                                              |                                                                                                                                                                                                |                                                                                     |  |  |  |  |  |  |  |  |
| 7  | Support for attending meetings and/or travel                                                                 | <input checked="" type="checkbox"/> <b>None</b><br><table border="1"> <tr><td></td><td></td></tr> <tr><td></td><td></td></tr> <tr><td></td><td></td></tr> </table>                             |                                                                                     |  |  |  |  |  |  |  |  |
|    |                                                                                                              |                                                                                                                                                                                                |                                                                                     |  |  |  |  |  |  |  |  |
|    |                                                                                                              |                                                                                                                                                                                                |                                                                                     |  |  |  |  |  |  |  |  |
|    |                                                                                                              |                                                                                                                                                                                                |                                                                                     |  |  |  |  |  |  |  |  |
| 8  | Patents planned, issued or pending                                                                           | <input checked="" type="checkbox"/> <b>None</b><br><table border="1"> <tr><td></td><td></td></tr> <tr><td></td><td></td></tr> <tr><td></td><td></td></tr> </table>                             |                                                                                     |  |  |  |  |  |  |  |  |
|    |                                                                                                              |                                                                                                                                                                                                |                                                                                     |  |  |  |  |  |  |  |  |
|    |                                                                                                              |                                                                                                                                                                                                |                                                                                     |  |  |  |  |  |  |  |  |
|    |                                                                                                              |                                                                                                                                                                                                |                                                                                     |  |  |  |  |  |  |  |  |
| 9  | Participation on a Data Safety Monitoring Board or Advisory Board                                            | <input checked="" type="checkbox"/> <b>None</b><br><table border="1"> <tr><td></td><td></td></tr> <tr><td></td><td></td></tr> <tr><td></td><td></td></tr> </table>                             |                                                                                     |  |  |  |  |  |  |  |  |
|    |                                                                                                              |                                                                                                                                                                                                |                                                                                     |  |  |  |  |  |  |  |  |
|    |                                                                                                              |                                                                                                                                                                                                |                                                                                     |  |  |  |  |  |  |  |  |
|    |                                                                                                              |                                                                                                                                                                                                |                                                                                     |  |  |  |  |  |  |  |  |
| 10 | Leadership or fiduciary role in other board, society, committee or advocacy group, paid or unpaid            | <input checked="" type="checkbox"/> <b>None</b><br><table border="1"> <tr><td></td><td></td></tr> <tr><td></td><td></td></tr> <tr><td></td><td></td></tr> </table>                             |                                                                                     |  |  |  |  |  |  |  |  |
|    |                                                                                                              |                                                                                                                                                                                                |                                                                                     |  |  |  |  |  |  |  |  |
|    |                                                                                                              |                                                                                                                                                                                                |                                                                                     |  |  |  |  |  |  |  |  |
|    |                                                                                                              |                                                                                                                                                                                                |                                                                                     |  |  |  |  |  |  |  |  |

|           |                                                                                  | Name all entities with whom you have this relationship or indicate none (add rows as needed)                                                                                                          | Specifications/Comments (e.g., if payments were made to you or to your institution) |  |  |  |  |  |  |
|-----------|----------------------------------------------------------------------------------|-------------------------------------------------------------------------------------------------------------------------------------------------------------------------------------------------------|-------------------------------------------------------------------------------------|--|--|--|--|--|--|
| <b>11</b> | Stock or stock options                                                           | <input checked="" type="checkbox"/> <b>None</b> <table border="1" style="width: 100%; margin-top: 5px;"> <tr><td></td><td></td></tr> <tr><td></td><td></td></tr> <tr><td></td><td></td></tr> </table> |                                                                                     |  |  |  |  |  |  |
|           |                                                                                  |                                                                                                                                                                                                       |                                                                                     |  |  |  |  |  |  |
|           |                                                                                  |                                                                                                                                                                                                       |                                                                                     |  |  |  |  |  |  |
|           |                                                                                  |                                                                                                                                                                                                       |                                                                                     |  |  |  |  |  |  |
| <b>12</b> | Receipt of equipment, materials, drugs, medical writing, gifts or other services | <input checked="" type="checkbox"/> <b>None</b> <table border="1" style="width: 100%; margin-top: 5px;"> <tr><td></td><td></td></tr> <tr><td></td><td></td></tr> <tr><td></td><td></td></tr> </table> |                                                                                     |  |  |  |  |  |  |
|           |                                                                                  |                                                                                                                                                                                                       |                                                                                     |  |  |  |  |  |  |
|           |                                                                                  |                                                                                                                                                                                                       |                                                                                     |  |  |  |  |  |  |
|           |                                                                                  |                                                                                                                                                                                                       |                                                                                     |  |  |  |  |  |  |
| <b>13</b> | Other financial or non-financial interests                                       | <input checked="" type="checkbox"/> <b>None</b> <table border="1" style="width: 100%; margin-top: 5px;"> <tr><td></td><td></td></tr> <tr><td></td><td></td></tr> <tr><td></td><td></td></tr> </table> |                                                                                     |  |  |  |  |  |  |
|           |                                                                                  |                                                                                                                                                                                                       |                                                                                     |  |  |  |  |  |  |
|           |                                                                                  |                                                                                                                                                                                                       |                                                                                     |  |  |  |  |  |  |
|           |                                                                                  |                                                                                                                                                                                                       |                                                                                     |  |  |  |  |  |  |

**Please place an "X" next to the following statement to indicate your agreement:**

☒ I certify that I have answered every question and have not altered the wording of any of the questions on this form.

# ICMJE DISCLOSURE FORM

**Date:** 9/30/2021

**Your Name:** Tim Felton

**Manuscript Title:** ClinCirc identifies alterations of the circadian peripheral oscillator in critical care patients

**Manuscript Number (if known):** 162775-JCI-CMED-1

In the interest of transparency, we ask you to disclose all relationships/activities/interests listed below that are related to the content of your manuscript. "Related" means any relation with for-profit or not-for-profit third parties whose interests may be affected by the content of the manuscript. Disclosure represents a commitment to transparency and does not necessarily indicate a bias. If you are in doubt about whether to list a relationship/activity/interest, it is preferable that you do so.

The author's relationships/activities/interests should be defined broadly. For example, if your manuscript pertains to the epidemiology of hypertension, you should declare all relationships with manufacturers of antihypertensive medication, even if that medication is not mentioned in the manuscript.

In item #1 below, report all support for the work reported in this manuscript without time limit. For all other items, the time frame for disclosure is the past 36 months.

|                                                           | Name all entities with whom you have this relationship or indicate none (add rows as needed)                                                                                   | Specifications/Comments (e.g., if payments were made to you or to your institution)                                                                                                                         |  |  |  |  |  |                                           |
|-----------------------------------------------------------|--------------------------------------------------------------------------------------------------------------------------------------------------------------------------------|-------------------------------------------------------------------------------------------------------------------------------------------------------------------------------------------------------------|--|--|--|--|--|-------------------------------------------|
| <b>Time frame: Since the initial planning of the work</b> |                                                                                                                                                                                |                                                                                                                                                                                                             |  |  |  |  |  |                                           |
| <b>1</b>                                                  | All support for the present manuscript (e.g., funding, provision of study materials, medical writing, article processing charges, etc.)<br><b>No time limit for this item.</b> | <input checked="" type="checkbox"/> <b>None</b><br><table border="1"> <tr><td></td><td></td></tr> <tr><td></td><td></td></tr> <tr><td></td><td>Click the tab key to add additional rows.</td></tr> </table> |  |  |  |  |  | Click the tab key to add additional rows. |
|                                                           |                                                                                                                                                                                |                                                                                                                                                                                                             |  |  |  |  |  |                                           |
|                                                           |                                                                                                                                                                                |                                                                                                                                                                                                             |  |  |  |  |  |                                           |
|                                                           | Click the tab key to add additional rows.                                                                                                                                      |                                                                                                                                                                                                             |  |  |  |  |  |                                           |
| <b>Time frame: past 36 months</b>                         |                                                                                                                                                                                |                                                                                                                                                                                                             |  |  |  |  |  |                                           |
| <b>2</b>                                                  | Grants or contracts from any entity (if not indicated in item #1 above).                                                                                                       | <input checked="" type="checkbox"/> <b>None</b><br><table border="1"> <tr><td></td><td></td></tr> <tr><td></td><td></td></tr> <tr><td></td><td></td></tr> </table>                                          |  |  |  |  |  |                                           |
|                                                           |                                                                                                                                                                                |                                                                                                                                                                                                             |  |  |  |  |  |                                           |
|                                                           |                                                                                                                                                                                |                                                                                                                                                                                                             |  |  |  |  |  |                                           |
|                                                           |                                                                                                                                                                                |                                                                                                                                                                                                             |  |  |  |  |  |                                           |
| <b>3</b>                                                  | Royalties or licenses                                                                                                                                                          | <input checked="" type="checkbox"/> <b>None</b><br><table border="1"> <tr><td></td><td></td></tr> <tr><td></td><td></td></tr> <tr><td></td><td></td></tr> </table>                                          |  |  |  |  |  |                                           |
|                                                           |                                                                                                                                                                                |                                                                                                                                                                                                             |  |  |  |  |  |                                           |
|                                                           |                                                                                                                                                                                |                                                                                                                                                                                                             |  |  |  |  |  |                                           |
|                                                           |                                                                                                                                                                                |                                                                                                                                                                                                             |  |  |  |  |  |                                           |

|    |                                                                                                              | Name all entities with whom you have this relationship or indicate none (add rows as needed)                                                                                                   | Specifications/Comments (e.g., if payments were made to you or to your institution) |  |  |  |  |  |  |  |  |
|----|--------------------------------------------------------------------------------------------------------------|------------------------------------------------------------------------------------------------------------------------------------------------------------------------------------------------|-------------------------------------------------------------------------------------|--|--|--|--|--|--|--|--|
| 4  | Consulting fees                                                                                              | <input checked="" type="checkbox"/> <b>None</b><br><table border="1"> <tr><td></td><td></td></tr> <tr><td></td><td></td></tr> <tr><td></td><td></td></tr> <tr><td></td><td></td></tr> </table> |                                                                                     |  |  |  |  |  |  |  |  |
|    |                                                                                                              |                                                                                                                                                                                                |                                                                                     |  |  |  |  |  |  |  |  |
|    |                                                                                                              |                                                                                                                                                                                                |                                                                                     |  |  |  |  |  |  |  |  |
|    |                                                                                                              |                                                                                                                                                                                                |                                                                                     |  |  |  |  |  |  |  |  |
|    |                                                                                                              |                                                                                                                                                                                                |                                                                                     |  |  |  |  |  |  |  |  |
| 5  | Payment or honoraria for lectures, presentations, speakers bureaus, manuscript writing or educational events | <input checked="" type="checkbox"/> <b>None</b><br><table border="1"> <tr><td></td><td></td></tr> <tr><td></td><td></td></tr> <tr><td></td><td></td></tr> </table>                             |                                                                                     |  |  |  |  |  |  |  |  |
|    |                                                                                                              |                                                                                                                                                                                                |                                                                                     |  |  |  |  |  |  |  |  |
|    |                                                                                                              |                                                                                                                                                                                                |                                                                                     |  |  |  |  |  |  |  |  |
|    |                                                                                                              |                                                                                                                                                                                                |                                                                                     |  |  |  |  |  |  |  |  |
| 6  | Payment for expert testimony                                                                                 | <input checked="" type="checkbox"/> <b>None</b><br><table border="1"> <tr><td></td><td></td></tr> <tr><td></td><td></td></tr> <tr><td></td><td></td></tr> </table>                             |                                                                                     |  |  |  |  |  |  |  |  |
|    |                                                                                                              |                                                                                                                                                                                                |                                                                                     |  |  |  |  |  |  |  |  |
|    |                                                                                                              |                                                                                                                                                                                                |                                                                                     |  |  |  |  |  |  |  |  |
|    |                                                                                                              |                                                                                                                                                                                                |                                                                                     |  |  |  |  |  |  |  |  |
| 7  | Support for attending meetings and/or travel                                                                 | <input checked="" type="checkbox"/> <b>None</b><br><table border="1"> <tr><td></td><td></td></tr> <tr><td></td><td></td></tr> <tr><td></td><td></td></tr> </table>                             |                                                                                     |  |  |  |  |  |  |  |  |
|    |                                                                                                              |                                                                                                                                                                                                |                                                                                     |  |  |  |  |  |  |  |  |
|    |                                                                                                              |                                                                                                                                                                                                |                                                                                     |  |  |  |  |  |  |  |  |
|    |                                                                                                              |                                                                                                                                                                                                |                                                                                     |  |  |  |  |  |  |  |  |
| 8  | Patents planned, issued or pending                                                                           | <input checked="" type="checkbox"/> <b>None</b><br><table border="1"> <tr><td></td><td></td></tr> <tr><td></td><td></td></tr> <tr><td></td><td></td></tr> </table>                             |                                                                                     |  |  |  |  |  |  |  |  |
|    |                                                                                                              |                                                                                                                                                                                                |                                                                                     |  |  |  |  |  |  |  |  |
|    |                                                                                                              |                                                                                                                                                                                                |                                                                                     |  |  |  |  |  |  |  |  |
|    |                                                                                                              |                                                                                                                                                                                                |                                                                                     |  |  |  |  |  |  |  |  |
| 9  | Participation on a Data Safety Monitoring Board or Advisory Board                                            | <input checked="" type="checkbox"/> <b>None</b><br><table border="1"> <tr><td></td><td></td></tr> <tr><td></td><td></td></tr> <tr><td></td><td></td></tr> </table>                             |                                                                                     |  |  |  |  |  |  |  |  |
|    |                                                                                                              |                                                                                                                                                                                                |                                                                                     |  |  |  |  |  |  |  |  |
|    |                                                                                                              |                                                                                                                                                                                                |                                                                                     |  |  |  |  |  |  |  |  |
|    |                                                                                                              |                                                                                                                                                                                                |                                                                                     |  |  |  |  |  |  |  |  |
| 10 | Leadership or fiduciary role in other board, society, committee or advocacy group, paid or unpaid            | <input checked="" type="checkbox"/> <b>None</b><br><table border="1"> <tr><td></td><td></td></tr> <tr><td></td><td></td></tr> <tr><td></td><td></td></tr> </table>                             |                                                                                     |  |  |  |  |  |  |  |  |
|    |                                                                                                              |                                                                                                                                                                                                |                                                                                     |  |  |  |  |  |  |  |  |
|    |                                                                                                              |                                                                                                                                                                                                |                                                                                     |  |  |  |  |  |  |  |  |
|    |                                                                                                              |                                                                                                                                                                                                |                                                                                     |  |  |  |  |  |  |  |  |

|           |                                                                                  | Name all entities with whom you have this relationship or indicate none (add rows as needed)                                                                                                           | Specifications/Comments (e.g., if payments were made to you or to your institution) |  |  |  |  |  |  |
|-----------|----------------------------------------------------------------------------------|--------------------------------------------------------------------------------------------------------------------------------------------------------------------------------------------------------|-------------------------------------------------------------------------------------|--|--|--|--|--|--|
| <b>11</b> | Stock or stock options                                                           | <input checked="" type="checkbox"/> <b>None</b> <table border="1" style="width: 100%; margin-top: 10px;"> <tr><td></td><td></td></tr> <tr><td></td><td></td></tr> <tr><td></td><td></td></tr> </table> |                                                                                     |  |  |  |  |  |  |
|           |                                                                                  |                                                                                                                                                                                                        |                                                                                     |  |  |  |  |  |  |
|           |                                                                                  |                                                                                                                                                                                                        |                                                                                     |  |  |  |  |  |  |
|           |                                                                                  |                                                                                                                                                                                                        |                                                                                     |  |  |  |  |  |  |
| <b>12</b> | Receipt of equipment, materials, drugs, medical writing, gifts or other services | <input checked="" type="checkbox"/> <b>None</b> <table border="1" style="width: 100%; margin-top: 10px;"> <tr><td></td><td></td></tr> <tr><td></td><td></td></tr> <tr><td></td><td></td></tr> </table> |                                                                                     |  |  |  |  |  |  |
|           |                                                                                  |                                                                                                                                                                                                        |                                                                                     |  |  |  |  |  |  |
|           |                                                                                  |                                                                                                                                                                                                        |                                                                                     |  |  |  |  |  |  |
|           |                                                                                  |                                                                                                                                                                                                        |                                                                                     |  |  |  |  |  |  |
| <b>13</b> | Other financial or non-financial interests                                       | <input checked="" type="checkbox"/> <b>None</b> <table border="1" style="width: 100%; margin-top: 10px;"> <tr><td></td><td></td></tr> <tr><td></td><td></td></tr> <tr><td></td><td></td></tr> </table> |                                                                                     |  |  |  |  |  |  |
|           |                                                                                  |                                                                                                                                                                                                        |                                                                                     |  |  |  |  |  |  |
|           |                                                                                  |                                                                                                                                                                                                        |                                                                                     |  |  |  |  |  |  |
|           |                                                                                  |                                                                                                                                                                                                        |                                                                                     |  |  |  |  |  |  |

**Please place an "X" next to the following statement to indicate your agreement:**

☒ I certify that I have answered every question and have not altered the wording of any of the questions on this form.



# ICMJE DISCLOSURE FORM

**Date:** 9/26/2022

**Your Name:** Dr Anthony Wilson

**Manuscript Title:** ClinCirc identifies alterations of the circadian peripheral oscillator in critical care patients

**Manuscript Number (if known):** 162775-JCI-CMED-1

In the interest of transparency, we ask you to disclose all relationships/activities/interests listed below that are related to the content of your manuscript. "Related" means any relation with for-profit or not-for-profit third parties whose interests may be affected by the content of the manuscript. Disclosure represents a commitment to transparency and does not necessarily indicate a bias. If you are in doubt about whether to list a relationship/activity/interest, it is preferable that you do so.

The author's relationships/activities/interests should be defined broadly. For example, if your manuscript pertains to the epidemiology of hypertension, you should declare all relationships with manufacturers of antihypertensive medication, even if that medication is not mentioned in the manuscript.

In item #1 below, report all support for the work reported in this manuscript without time limit. For all other items, the time frame for disclosure is the past 36 months.

|                                                           | Name all entities with whom you have this relationship or indicate none (add rows as needed)                                                                                   | Specifications/Comments (e.g., if payments were made to you or to your institution)                                                                                                                         |  |  |  |  |  |                                           |
|-----------------------------------------------------------|--------------------------------------------------------------------------------------------------------------------------------------------------------------------------------|-------------------------------------------------------------------------------------------------------------------------------------------------------------------------------------------------------------|--|--|--|--|--|-------------------------------------------|
| <b>Time frame: Since the initial planning of the work</b> |                                                                                                                                                                                |                                                                                                                                                                                                             |  |  |  |  |  |                                           |
| <b>1</b>                                                  | All support for the present manuscript (e.g., funding, provision of study materials, medical writing, article processing charges, etc.)<br><b>No time limit for this item.</b> | <input checked="" type="checkbox"/> <b>None</b><br><table border="1"> <tr><td></td><td></td></tr> <tr><td></td><td></td></tr> <tr><td></td><td>Click the tab key to add additional rows.</td></tr> </table> |  |  |  |  |  | Click the tab key to add additional rows. |
|                                                           |                                                                                                                                                                                |                                                                                                                                                                                                             |  |  |  |  |  |                                           |
|                                                           |                                                                                                                                                                                |                                                                                                                                                                                                             |  |  |  |  |  |                                           |
|                                                           | Click the tab key to add additional rows.                                                                                                                                      |                                                                                                                                                                                                             |  |  |  |  |  |                                           |
| <b>Time frame: past 36 months</b>                         |                                                                                                                                                                                |                                                                                                                                                                                                             |  |  |  |  |  |                                           |
| <b>2</b>                                                  | Grants or contracts from any entity (if not indicated in item #1 above).                                                                                                       | <input checked="" type="checkbox"/> <b>None</b><br><table border="1"> <tr><td></td><td></td></tr> <tr><td></td><td></td></tr> <tr><td></td><td></td></tr> </table>                                          |  |  |  |  |  |                                           |
|                                                           |                                                                                                                                                                                |                                                                                                                                                                                                             |  |  |  |  |  |                                           |
|                                                           |                                                                                                                                                                                |                                                                                                                                                                                                             |  |  |  |  |  |                                           |
|                                                           |                                                                                                                                                                                |                                                                                                                                                                                                             |  |  |  |  |  |                                           |
| <b>3</b>                                                  | Royalties or licenses                                                                                                                                                          | <input checked="" type="checkbox"/> <b>None</b><br><table border="1"> <tr><td></td><td></td></tr> <tr><td></td><td></td></tr> <tr><td></td><td></td></tr> </table>                                          |  |  |  |  |  |                                           |
|                                                           |                                                                                                                                                                                |                                                                                                                                                                                                             |  |  |  |  |  |                                           |
|                                                           |                                                                                                                                                                                |                                                                                                                                                                                                             |  |  |  |  |  |                                           |
|                                                           |                                                                                                                                                                                |                                                                                                                                                                                                             |  |  |  |  |  |                                           |

|    |                                                                                                              | Name all entities with whom you have this relationship or indicate none (add rows as needed)                                                                                                   | Specifications/Comments (e.g., if payments were made to you or to your institution) |  |  |  |  |  |  |  |  |
|----|--------------------------------------------------------------------------------------------------------------|------------------------------------------------------------------------------------------------------------------------------------------------------------------------------------------------|-------------------------------------------------------------------------------------|--|--|--|--|--|--|--|--|
| 4  | Consulting fees                                                                                              | <input checked="" type="checkbox"/> <b>None</b><br><table border="1"> <tr><td></td><td></td></tr> <tr><td></td><td></td></tr> <tr><td></td><td></td></tr> <tr><td></td><td></td></tr> </table> |                                                                                     |  |  |  |  |  |  |  |  |
|    |                                                                                                              |                                                                                                                                                                                                |                                                                                     |  |  |  |  |  |  |  |  |
|    |                                                                                                              |                                                                                                                                                                                                |                                                                                     |  |  |  |  |  |  |  |  |
|    |                                                                                                              |                                                                                                                                                                                                |                                                                                     |  |  |  |  |  |  |  |  |
|    |                                                                                                              |                                                                                                                                                                                                |                                                                                     |  |  |  |  |  |  |  |  |
| 5  | Payment or honoraria for lectures, presentations, speakers bureaus, manuscript writing or educational events | <input checked="" type="checkbox"/> <b>None</b><br><table border="1"> <tr><td></td><td></td></tr> <tr><td></td><td></td></tr> <tr><td></td><td></td></tr> </table>                             |                                                                                     |  |  |  |  |  |  |  |  |
|    |                                                                                                              |                                                                                                                                                                                                |                                                                                     |  |  |  |  |  |  |  |  |
|    |                                                                                                              |                                                                                                                                                                                                |                                                                                     |  |  |  |  |  |  |  |  |
|    |                                                                                                              |                                                                                                                                                                                                |                                                                                     |  |  |  |  |  |  |  |  |
| 6  | Payment for expert testimony                                                                                 | <input checked="" type="checkbox"/> <b>None</b><br><table border="1"> <tr><td></td><td></td></tr> <tr><td></td><td></td></tr> <tr><td></td><td></td></tr> </table>                             |                                                                                     |  |  |  |  |  |  |  |  |
|    |                                                                                                              |                                                                                                                                                                                                |                                                                                     |  |  |  |  |  |  |  |  |
|    |                                                                                                              |                                                                                                                                                                                                |                                                                                     |  |  |  |  |  |  |  |  |
|    |                                                                                                              |                                                                                                                                                                                                |                                                                                     |  |  |  |  |  |  |  |  |
| 7  | Support for attending meetings and/or travel                                                                 | <input checked="" type="checkbox"/> <b>None</b><br><table border="1"> <tr><td></td><td></td></tr> <tr><td></td><td></td></tr> <tr><td></td><td></td></tr> </table>                             |                                                                                     |  |  |  |  |  |  |  |  |
|    |                                                                                                              |                                                                                                                                                                                                |                                                                                     |  |  |  |  |  |  |  |  |
|    |                                                                                                              |                                                                                                                                                                                                |                                                                                     |  |  |  |  |  |  |  |  |
|    |                                                                                                              |                                                                                                                                                                                                |                                                                                     |  |  |  |  |  |  |  |  |
| 8  | Patents planned, issued or pending                                                                           | <input checked="" type="checkbox"/> <b>None</b><br><table border="1"> <tr><td></td><td></td></tr> <tr><td></td><td></td></tr> <tr><td></td><td></td></tr> </table>                             |                                                                                     |  |  |  |  |  |  |  |  |
|    |                                                                                                              |                                                                                                                                                                                                |                                                                                     |  |  |  |  |  |  |  |  |
|    |                                                                                                              |                                                                                                                                                                                                |                                                                                     |  |  |  |  |  |  |  |  |
|    |                                                                                                              |                                                                                                                                                                                                |                                                                                     |  |  |  |  |  |  |  |  |
| 9  | Participation on a Data Safety Monitoring Board or Advisory Board                                            | <input checked="" type="checkbox"/> <b>None</b><br><table border="1"> <tr><td></td><td></td></tr> <tr><td></td><td></td></tr> <tr><td></td><td></td></tr> </table>                             |                                                                                     |  |  |  |  |  |  |  |  |
|    |                                                                                                              |                                                                                                                                                                                                |                                                                                     |  |  |  |  |  |  |  |  |
|    |                                                                                                              |                                                                                                                                                                                                |                                                                                     |  |  |  |  |  |  |  |  |
|    |                                                                                                              |                                                                                                                                                                                                |                                                                                     |  |  |  |  |  |  |  |  |
| 10 | Leadership or fiduciary role in other board, society, committee or advocacy group, paid or unpaid            | <input checked="" type="checkbox"/> <b>None</b><br><table border="1"> <tr><td></td><td></td></tr> <tr><td></td><td></td></tr> <tr><td></td><td></td></tr> </table>                             |                                                                                     |  |  |  |  |  |  |  |  |
|    |                                                                                                              |                                                                                                                                                                                                |                                                                                     |  |  |  |  |  |  |  |  |
|    |                                                                                                              |                                                                                                                                                                                                |                                                                                     |  |  |  |  |  |  |  |  |
|    |                                                                                                              |                                                                                                                                                                                                |                                                                                     |  |  |  |  |  |  |  |  |

|           |                                                                                  | Name all entities with whom you have this relationship or indicate none (add rows as needed)                                                                                                          | Specifications/Comments (e.g., if payments were made to you or to your institution) |  |  |  |  |  |  |
|-----------|----------------------------------------------------------------------------------|-------------------------------------------------------------------------------------------------------------------------------------------------------------------------------------------------------|-------------------------------------------------------------------------------------|--|--|--|--|--|--|
| <b>11</b> | Stock or stock options                                                           | <input checked="" type="checkbox"/> <b>None</b> <table border="1" style="width: 100%; margin-top: 5px;"> <tr><td></td><td></td></tr> <tr><td></td><td></td></tr> <tr><td></td><td></td></tr> </table> |                                                                                     |  |  |  |  |  |  |
|           |                                                                                  |                                                                                                                                                                                                       |                                                                                     |  |  |  |  |  |  |
|           |                                                                                  |                                                                                                                                                                                                       |                                                                                     |  |  |  |  |  |  |
|           |                                                                                  |                                                                                                                                                                                                       |                                                                                     |  |  |  |  |  |  |
| <b>12</b> | Receipt of equipment, materials, drugs, medical writing, gifts or other services | <input checked="" type="checkbox"/> <b>None</b> <table border="1" style="width: 100%; margin-top: 5px;"> <tr><td></td><td></td></tr> <tr><td></td><td></td></tr> <tr><td></td><td></td></tr> </table> |                                                                                     |  |  |  |  |  |  |
|           |                                                                                  |                                                                                                                                                                                                       |                                                                                     |  |  |  |  |  |  |
|           |                                                                                  |                                                                                                                                                                                                       |                                                                                     |  |  |  |  |  |  |
|           |                                                                                  |                                                                                                                                                                                                       |                                                                                     |  |  |  |  |  |  |
| <b>13</b> | Other financial or non-financial interests                                       | <input checked="" type="checkbox"/> <b>None</b> <table border="1" style="width: 100%; margin-top: 5px;"> <tr><td></td><td></td></tr> <tr><td></td><td></td></tr> <tr><td></td><td></td></tr> </table> |                                                                                     |  |  |  |  |  |  |
|           |                                                                                  |                                                                                                                                                                                                       |                                                                                     |  |  |  |  |  |  |
|           |                                                                                  |                                                                                                                                                                                                       |                                                                                     |  |  |  |  |  |  |
|           |                                                                                  |                                                                                                                                                                                                       |                                                                                     |  |  |  |  |  |  |

**Please place an "X" next to the following statement to indicate your agreement:**

☒ I certify that I have answered every question and have not altered the wording of any of the questions on this form.

# ICMJE DISCLOSURE FORM

**Date:** 9/29/2022

**Your Name:** Jonathan Bannard-Smith

**Manuscript Title:** ClinCirc identifies alterations of the circadian peripheral oscillator in critical care patients

**Manuscript Number (if known):** 162775-JCI-CMED-1

In the interest of transparency, we ask you to disclose all relationships/activities/interests listed below that are related to the content of your manuscript. "Related" means any relation with for-profit or not-for-profit third parties whose interests may be affected by the content of the manuscript. Disclosure represents a commitment to transparency and does not necessarily indicate a bias. If you are in doubt about whether to list a relationship/activity/interest, it is preferable that you do so.

The author's relationships/activities/interests should be defined broadly. For example, if your manuscript pertains to the epidemiology of hypertension, you should declare all relationships with manufacturers of antihypertensive medication, even if that medication is not mentioned in the manuscript.

In item #1 below, report all support for the work reported in this manuscript without time limit. For all other items, the time frame for disclosure is the past 36 months.

|                                                           | Name all entities with whom you have this relationship or indicate none (add rows as needed)                                                                                   | Specifications/Comments (e.g., if payments were made to you or to your institution)                                                                                                                         |  |  |  |  |  |                                           |
|-----------------------------------------------------------|--------------------------------------------------------------------------------------------------------------------------------------------------------------------------------|-------------------------------------------------------------------------------------------------------------------------------------------------------------------------------------------------------------|--|--|--|--|--|-------------------------------------------|
| <b>Time frame: Since the initial planning of the work</b> |                                                                                                                                                                                |                                                                                                                                                                                                             |  |  |  |  |  |                                           |
| <b>1</b>                                                  | All support for the present manuscript (e.g., funding, provision of study materials, medical writing, article processing charges, etc.)<br><b>No time limit for this item.</b> | <input checked="" type="checkbox"/> <b>None</b><br><table border="1"> <tr><td></td><td></td></tr> <tr><td></td><td></td></tr> <tr><td></td><td>Click the tab key to add additional rows.</td></tr> </table> |  |  |  |  |  | Click the tab key to add additional rows. |
|                                                           |                                                                                                                                                                                |                                                                                                                                                                                                             |  |  |  |  |  |                                           |
|                                                           |                                                                                                                                                                                |                                                                                                                                                                                                             |  |  |  |  |  |                                           |
|                                                           | Click the tab key to add additional rows.                                                                                                                                      |                                                                                                                                                                                                             |  |  |  |  |  |                                           |
| <b>Time frame: past 36 months</b>                         |                                                                                                                                                                                |                                                                                                                                                                                                             |  |  |  |  |  |                                           |
| <b>2</b>                                                  | Grants or contracts from any entity (if not indicated in item #1 above).                                                                                                       | <input checked="" type="checkbox"/> <b>None</b><br><table border="1"> <tr><td></td><td></td></tr> <tr><td></td><td></td></tr> <tr><td></td><td></td></tr> </table>                                          |  |  |  |  |  |                                           |
|                                                           |                                                                                                                                                                                |                                                                                                                                                                                                             |  |  |  |  |  |                                           |
|                                                           |                                                                                                                                                                                |                                                                                                                                                                                                             |  |  |  |  |  |                                           |
|                                                           |                                                                                                                                                                                |                                                                                                                                                                                                             |  |  |  |  |  |                                           |
| <b>3</b>                                                  | Royalties or licenses                                                                                                                                                          | <input checked="" type="checkbox"/> <b>None</b><br><table border="1"> <tr><td></td><td></td></tr> <tr><td></td><td></td></tr> <tr><td></td><td></td></tr> </table>                                          |  |  |  |  |  |                                           |
|                                                           |                                                                                                                                                                                |                                                                                                                                                                                                             |  |  |  |  |  |                                           |
|                                                           |                                                                                                                                                                                |                                                                                                                                                                                                             |  |  |  |  |  |                                           |
|                                                           |                                                                                                                                                                                |                                                                                                                                                                                                             |  |  |  |  |  |                                           |

|    |                                                                                                              | Name all entities with whom you have this relationship or indicate none (add rows as needed)                                                                                                   | Specifications/Comments (e.g., if payments were made to you or to your institution) |  |  |  |  |  |  |  |  |
|----|--------------------------------------------------------------------------------------------------------------|------------------------------------------------------------------------------------------------------------------------------------------------------------------------------------------------|-------------------------------------------------------------------------------------|--|--|--|--|--|--|--|--|
| 4  | Consulting fees                                                                                              | <input checked="" type="checkbox"/> <b>None</b><br><table border="1"> <tr><td></td><td></td></tr> <tr><td></td><td></td></tr> <tr><td></td><td></td></tr> <tr><td></td><td></td></tr> </table> |                                                                                     |  |  |  |  |  |  |  |  |
|    |                                                                                                              |                                                                                                                                                                                                |                                                                                     |  |  |  |  |  |  |  |  |
|    |                                                                                                              |                                                                                                                                                                                                |                                                                                     |  |  |  |  |  |  |  |  |
|    |                                                                                                              |                                                                                                                                                                                                |                                                                                     |  |  |  |  |  |  |  |  |
|    |                                                                                                              |                                                                                                                                                                                                |                                                                                     |  |  |  |  |  |  |  |  |
| 5  | Payment or honoraria for lectures, presentations, speakers bureaus, manuscript writing or educational events | <input checked="" type="checkbox"/> <b>None</b><br><table border="1"> <tr><td></td><td></td></tr> <tr><td></td><td></td></tr> <tr><td></td><td></td></tr> </table>                             |                                                                                     |  |  |  |  |  |  |  |  |
|    |                                                                                                              |                                                                                                                                                                                                |                                                                                     |  |  |  |  |  |  |  |  |
|    |                                                                                                              |                                                                                                                                                                                                |                                                                                     |  |  |  |  |  |  |  |  |
|    |                                                                                                              |                                                                                                                                                                                                |                                                                                     |  |  |  |  |  |  |  |  |
| 6  | Payment for expert testimony                                                                                 | <input checked="" type="checkbox"/> <b>None</b><br><table border="1"> <tr><td></td><td></td></tr> <tr><td></td><td></td></tr> <tr><td></td><td></td></tr> </table>                             |                                                                                     |  |  |  |  |  |  |  |  |
|    |                                                                                                              |                                                                                                                                                                                                |                                                                                     |  |  |  |  |  |  |  |  |
|    |                                                                                                              |                                                                                                                                                                                                |                                                                                     |  |  |  |  |  |  |  |  |
|    |                                                                                                              |                                                                                                                                                                                                |                                                                                     |  |  |  |  |  |  |  |  |
| 7  | Support for attending meetings and/or travel                                                                 | <input checked="" type="checkbox"/> <b>None</b><br><table border="1"> <tr><td></td><td></td></tr> <tr><td></td><td></td></tr> <tr><td></td><td></td></tr> </table>                             |                                                                                     |  |  |  |  |  |  |  |  |
|    |                                                                                                              |                                                                                                                                                                                                |                                                                                     |  |  |  |  |  |  |  |  |
|    |                                                                                                              |                                                                                                                                                                                                |                                                                                     |  |  |  |  |  |  |  |  |
|    |                                                                                                              |                                                                                                                                                                                                |                                                                                     |  |  |  |  |  |  |  |  |
| 8  | Patents planned, issued or pending                                                                           | <input checked="" type="checkbox"/> <b>None</b><br><table border="1"> <tr><td></td><td></td></tr> <tr><td></td><td></td></tr> <tr><td></td><td></td></tr> </table>                             |                                                                                     |  |  |  |  |  |  |  |  |
|    |                                                                                                              |                                                                                                                                                                                                |                                                                                     |  |  |  |  |  |  |  |  |
|    |                                                                                                              |                                                                                                                                                                                                |                                                                                     |  |  |  |  |  |  |  |  |
|    |                                                                                                              |                                                                                                                                                                                                |                                                                                     |  |  |  |  |  |  |  |  |
| 9  | Participation on a Data Safety Monitoring Board or Advisory Board                                            | <input checked="" type="checkbox"/> <b>None</b><br><table border="1"> <tr><td></td><td></td></tr> <tr><td></td><td></td></tr> <tr><td></td><td></td></tr> </table>                             |                                                                                     |  |  |  |  |  |  |  |  |
|    |                                                                                                              |                                                                                                                                                                                                |                                                                                     |  |  |  |  |  |  |  |  |
|    |                                                                                                              |                                                                                                                                                                                                |                                                                                     |  |  |  |  |  |  |  |  |
|    |                                                                                                              |                                                                                                                                                                                                |                                                                                     |  |  |  |  |  |  |  |  |
| 10 | Leadership or fiduciary role in other board, society, committee or advocacy group, paid or unpaid            | <input checked="" type="checkbox"/> <b>None</b><br><table border="1"> <tr><td></td><td></td></tr> <tr><td></td><td></td></tr> <tr><td></td><td></td></tr> </table>                             |                                                                                     |  |  |  |  |  |  |  |  |
|    |                                                                                                              |                                                                                                                                                                                                |                                                                                     |  |  |  |  |  |  |  |  |
|    |                                                                                                              |                                                                                                                                                                                                |                                                                                     |  |  |  |  |  |  |  |  |
|    |                                                                                                              |                                                                                                                                                                                                |                                                                                     |  |  |  |  |  |  |  |  |

|           |                                                                                  | Name all entities with whom you have this relationship or indicate none (add rows as needed)                                                                                                           | Specifications/Comments (e.g., if payments were made to you or to your institution) |  |  |  |  |  |  |
|-----------|----------------------------------------------------------------------------------|--------------------------------------------------------------------------------------------------------------------------------------------------------------------------------------------------------|-------------------------------------------------------------------------------------|--|--|--|--|--|--|
| <b>11</b> | Stock or stock options                                                           | <input checked="" type="checkbox"/> <b>None</b> <table border="1" style="width: 100%; margin-top: 10px;"> <tr><td></td><td></td></tr> <tr><td></td><td></td></tr> <tr><td></td><td></td></tr> </table> |                                                                                     |  |  |  |  |  |  |
|           |                                                                                  |                                                                                                                                                                                                        |                                                                                     |  |  |  |  |  |  |
|           |                                                                                  |                                                                                                                                                                                                        |                                                                                     |  |  |  |  |  |  |
|           |                                                                                  |                                                                                                                                                                                                        |                                                                                     |  |  |  |  |  |  |
| <b>12</b> | Receipt of equipment, materials, drugs, medical writing, gifts or other services | <input checked="" type="checkbox"/> <b>None</b> <table border="1" style="width: 100%; margin-top: 10px;"> <tr><td></td><td></td></tr> <tr><td></td><td></td></tr> <tr><td></td><td></td></tr> </table> |                                                                                     |  |  |  |  |  |  |
|           |                                                                                  |                                                                                                                                                                                                        |                                                                                     |  |  |  |  |  |  |
|           |                                                                                  |                                                                                                                                                                                                        |                                                                                     |  |  |  |  |  |  |
|           |                                                                                  |                                                                                                                                                                                                        |                                                                                     |  |  |  |  |  |  |
| <b>13</b> | Other financial or non-financial interests                                       | <input checked="" type="checkbox"/> <b>None</b> <table border="1" style="width: 100%; margin-top: 10px;"> <tr><td></td><td></td></tr> <tr><td></td><td></td></tr> <tr><td></td><td></td></tr> </table> |                                                                                     |  |  |  |  |  |  |
|           |                                                                                  |                                                                                                                                                                                                        |                                                                                     |  |  |  |  |  |  |
|           |                                                                                  |                                                                                                                                                                                                        |                                                                                     |  |  |  |  |  |  |
|           |                                                                                  |                                                                                                                                                                                                        |                                                                                     |  |  |  |  |  |  |

**Please place an "X" next to the following statement to indicate your agreement:**

☒ I certify that I have answered every question and have not altered the wording of any of the questions on this form.

# ICMJE DISCLOSURE FORM

**Date:** 9/29/2022

**Your Name:** Prof Martin Rutter

**Manuscript Title:** ClinCirc identifies alterations of the circadian peripheral oscillator in critical care patients

**Manuscript Number (if known):** 162775-JCI-CMED-1

In the interest of transparency, we ask you to disclose all relationships/activities/interests listed below that are related to the content of your manuscript. "Related" means any relation with for-profit or not-for-profit third parties whose interests may be affected by the content of the manuscript. Disclosure represents a commitment to transparency and does not necessarily indicate a bias. If you are in doubt about whether to list a relationship/activity/interest, it is preferable that you do so.

The author's relationships/activities/interests should be defined broadly. For example, if your manuscript pertains to the epidemiology of hypertension, you should declare all relationships with manufacturers of antihypertensive medication, even if that medication is not mentioned in the manuscript.

In item #1 below, report all support for the work reported in this manuscript without time limit. For all other items, the time frame for disclosure is the past 36 months.

|                                                           | Name all entities with whom you have this relationship or indicate none (add rows as needed)                                                                                   | Specifications/Comments (e.g., if payments were made to you or to your institution)                                                                                                                         |  |  |  |  |  |                                           |
|-----------------------------------------------------------|--------------------------------------------------------------------------------------------------------------------------------------------------------------------------------|-------------------------------------------------------------------------------------------------------------------------------------------------------------------------------------------------------------|--|--|--|--|--|-------------------------------------------|
| <b>Time frame: Since the initial planning of the work</b> |                                                                                                                                                                                |                                                                                                                                                                                                             |  |  |  |  |  |                                           |
| <b>1</b>                                                  | All support for the present manuscript (e.g., funding, provision of study materials, medical writing, article processing charges, etc.)<br><b>No time limit for this item.</b> | <input checked="" type="checkbox"/> <b>None</b><br><table border="1"> <tr><td></td><td></td></tr> <tr><td></td><td></td></tr> <tr><td></td><td>Click the tab key to add additional rows.</td></tr> </table> |  |  |  |  |  | Click the tab key to add additional rows. |
|                                                           |                                                                                                                                                                                |                                                                                                                                                                                                             |  |  |  |  |  |                                           |
|                                                           |                                                                                                                                                                                |                                                                                                                                                                                                             |  |  |  |  |  |                                           |
|                                                           | Click the tab key to add additional rows.                                                                                                                                      |                                                                                                                                                                                                             |  |  |  |  |  |                                           |
| <b>Time frame: past 36 months</b>                         |                                                                                                                                                                                |                                                                                                                                                                                                             |  |  |  |  |  |                                           |
| <b>2</b>                                                  | Grants or contracts from any entity (if not indicated in item #1 above).                                                                                                       | <input checked="" type="checkbox"/> <b>None</b><br><table border="1"> <tr><td></td><td></td></tr> <tr><td></td><td></td></tr> <tr><td></td><td></td></tr> </table>                                          |  |  |  |  |  |                                           |
|                                                           |                                                                                                                                                                                |                                                                                                                                                                                                             |  |  |  |  |  |                                           |
|                                                           |                                                                                                                                                                                |                                                                                                                                                                                                             |  |  |  |  |  |                                           |
|                                                           |                                                                                                                                                                                |                                                                                                                                                                                                             |  |  |  |  |  |                                           |
| <b>3</b>                                                  | Royalties or licenses                                                                                                                                                          | <input checked="" type="checkbox"/> <b>None</b><br><table border="1"> <tr><td></td><td></td></tr> <tr><td></td><td></td></tr> <tr><td></td><td></td></tr> </table>                                          |  |  |  |  |  |                                           |
|                                                           |                                                                                                                                                                                |                                                                                                                                                                                                             |  |  |  |  |  |                                           |
|                                                           |                                                                                                                                                                                |                                                                                                                                                                                                             |  |  |  |  |  |                                           |
|                                                           |                                                                                                                                                                                |                                                                                                                                                                                                             |  |  |  |  |  |                                           |

|                                                                                                                                       |                                                                                                              | Name all entities with whom you have this relationship or indicate none (add rows as needed)                                                                                                                                                                                                                                                                                                                                                                                                                       | Specifications/Comments (e.g., if payments were made to you or to your institution) |                                                                                            |                                                                  |                                                                                                   |        |                                                                                                                                       |        |  |  |
|---------------------------------------------------------------------------------------------------------------------------------------|--------------------------------------------------------------------------------------------------------------|--------------------------------------------------------------------------------------------------------------------------------------------------------------------------------------------------------------------------------------------------------------------------------------------------------------------------------------------------------------------------------------------------------------------------------------------------------------------------------------------------------------------|-------------------------------------------------------------------------------------|--------------------------------------------------------------------------------------------|------------------------------------------------------------------|---------------------------------------------------------------------------------------------------|--------|---------------------------------------------------------------------------------------------------------------------------------------|--------|--|--|
| 4                                                                                                                                     | Consulting fees                                                                                              | <input checked="" type="checkbox"/> <b>None</b><br><table border="1"> <tr><td></td><td></td></tr> <tr><td></td><td></td></tr> <tr><td></td><td></td></tr> <tr><td></td><td></td></tr> </table>                                                                                                                                                                                                                                                                                                                     |                                                                                     |                                                                                            |                                                                  |                                                                                                   |        |                                                                                                                                       |        |  |  |
|                                                                                                                                       |                                                                                                              |                                                                                                                                                                                                                                                                                                                                                                                                                                                                                                                    |                                                                                     |                                                                                            |                                                                  |                                                                                                   |        |                                                                                                                                       |        |  |  |
|                                                                                                                                       |                                                                                                              |                                                                                                                                                                                                                                                                                                                                                                                                                                                                                                                    |                                                                                     |                                                                                            |                                                                  |                                                                                                   |        |                                                                                                                                       |        |  |  |
|                                                                                                                                       |                                                                                                              |                                                                                                                                                                                                                                                                                                                                                                                                                                                                                                                    |                                                                                     |                                                                                            |                                                                  |                                                                                                   |        |                                                                                                                                       |        |  |  |
|                                                                                                                                       |                                                                                                              |                                                                                                                                                                                                                                                                                                                                                                                                                                                                                                                    |                                                                                     |                                                                                            |                                                                  |                                                                                                   |        |                                                                                                                                       |        |  |  |
| 5                                                                                                                                     | Payment or honoraria for lectures, presentations, speakers bureaus, manuscript writing or educational events | <input checked="" type="checkbox"/> <b>None</b><br><table border="1"> <tr><td></td><td></td></tr> <tr><td></td><td></td></tr> <tr><td></td><td></td></tr> </table>                                                                                                                                                                                                                                                                                                                                                 |                                                                                     |                                                                                            |                                                                  |                                                                                                   |        |                                                                                                                                       |        |  |  |
|                                                                                                                                       |                                                                                                              |                                                                                                                                                                                                                                                                                                                                                                                                                                                                                                                    |                                                                                     |                                                                                            |                                                                  |                                                                                                   |        |                                                                                                                                       |        |  |  |
|                                                                                                                                       |                                                                                                              |                                                                                                                                                                                                                                                                                                                                                                                                                                                                                                                    |                                                                                     |                                                                                            |                                                                  |                                                                                                   |        |                                                                                                                                       |        |  |  |
|                                                                                                                                       |                                                                                                              |                                                                                                                                                                                                                                                                                                                                                                                                                                                                                                                    |                                                                                     |                                                                                            |                                                                  |                                                                                                   |        |                                                                                                                                       |        |  |  |
| 6                                                                                                                                     | Payment for expert testimony                                                                                 | <input checked="" type="checkbox"/> <b>None</b><br><table border="1"> <tr><td></td><td></td></tr> <tr><td></td><td></td></tr> <tr><td></td><td></td></tr> </table>                                                                                                                                                                                                                                                                                                                                                 |                                                                                     |                                                                                            |                                                                  |                                                                                                   |        |                                                                                                                                       |        |  |  |
|                                                                                                                                       |                                                                                                              |                                                                                                                                                                                                                                                                                                                                                                                                                                                                                                                    |                                                                                     |                                                                                            |                                                                  |                                                                                                   |        |                                                                                                                                       |        |  |  |
|                                                                                                                                       |                                                                                                              |                                                                                                                                                                                                                                                                                                                                                                                                                                                                                                                    |                                                                                     |                                                                                            |                                                                  |                                                                                                   |        |                                                                                                                                       |        |  |  |
|                                                                                                                                       |                                                                                                              |                                                                                                                                                                                                                                                                                                                                                                                                                                                                                                                    |                                                                                     |                                                                                            |                                                                  |                                                                                                   |        |                                                                                                                                       |        |  |  |
| 7                                                                                                                                     | Support for attending meetings and/or travel                                                                 | <input type="checkbox"/> <b>None</b><br><table border="1"> <tr> <td>The EASD paid for me to attend their annual conference in Sept 2022 as an invited speaker</td> <td>Travel and accommodation only were paid. No other payments to me</td> </tr> <tr><td></td><td></td></tr> <tr><td></td><td></td></tr> </table>                                                                                                                                                                                                |                                                                                     | The EASD paid for me to attend their annual conference in Sept 2022 as an invited speaker  | Travel and accommodation only were paid. No other payments to me |                                                                                                   |        |                                                                                                                                       |        |  |  |
| The EASD paid for me to attend their annual conference in Sept 2022 as an invited speaker                                             | Travel and accommodation only were paid. No other payments to me                                             |                                                                                                                                                                                                                                                                                                                                                                                                                                                                                                                    |                                                                                     |                                                                                            |                                                                  |                                                                                                   |        |                                                                                                                                       |        |  |  |
|                                                                                                                                       |                                                                                                              |                                                                                                                                                                                                                                                                                                                                                                                                                                                                                                                    |                                                                                     |                                                                                            |                                                                  |                                                                                                   |        |                                                                                                                                       |        |  |  |
|                                                                                                                                       |                                                                                                              |                                                                                                                                                                                                                                                                                                                                                                                                                                                                                                                    |                                                                                     |                                                                                            |                                                                  |                                                                                                   |        |                                                                                                                                       |        |  |  |
| 8                                                                                                                                     | Patents planned, issued or pending                                                                           | <input checked="" type="checkbox"/> <b>None</b><br><table border="1"> <tr><td></td><td></td></tr> <tr><td></td><td></td></tr> <tr><td></td><td></td></tr> </table>                                                                                                                                                                                                                                                                                                                                                 |                                                                                     |                                                                                            |                                                                  |                                                                                                   |        |                                                                                                                                       |        |  |  |
|                                                                                                                                       |                                                                                                              |                                                                                                                                                                                                                                                                                                                                                                                                                                                                                                                    |                                                                                     |                                                                                            |                                                                  |                                                                                                   |        |                                                                                                                                       |        |  |  |
|                                                                                                                                       |                                                                                                              |                                                                                                                                                                                                                                                                                                                                                                                                                                                                                                                    |                                                                                     |                                                                                            |                                                                  |                                                                                                   |        |                                                                                                                                       |        |  |  |
|                                                                                                                                       |                                                                                                              |                                                                                                                                                                                                                                                                                                                                                                                                                                                                                                                    |                                                                                     |                                                                                            |                                                                  |                                                                                                   |        |                                                                                                                                       |        |  |  |
| 9                                                                                                                                     | Participation on a Data Safety Monitoring Board or Advisory Board                                            | <input checked="" type="checkbox"/> <b>None</b><br><table border="1"> <tr><td></td><td></td></tr> <tr><td></td><td></td></tr> <tr><td></td><td></td></tr> </table>                                                                                                                                                                                                                                                                                                                                                 |                                                                                     |                                                                                            |                                                                  |                                                                                                   |        |                                                                                                                                       |        |  |  |
|                                                                                                                                       |                                                                                                              |                                                                                                                                                                                                                                                                                                                                                                                                                                                                                                                    |                                                                                     |                                                                                            |                                                                  |                                                                                                   |        |                                                                                                                                       |        |  |  |
|                                                                                                                                       |                                                                                                              |                                                                                                                                                                                                                                                                                                                                                                                                                                                                                                                    |                                                                                     |                                                                                            |                                                                  |                                                                                                   |        |                                                                                                                                       |        |  |  |
|                                                                                                                                       |                                                                                                              |                                                                                                                                                                                                                                                                                                                                                                                                                                                                                                                    |                                                                                     |                                                                                            |                                                                  |                                                                                                   |        |                                                                                                                                       |        |  |  |
| 10                                                                                                                                    | Leadership or fiduciary role in other board, society, committee or advocacy group, paid or unpaid            | <input type="checkbox"/> <b>None</b><br><table border="1"> <tr> <td>Chair, European Diabetology, a charity supporting diabetes related education across Europe</td> <td>Unpaid</td> </tr> <tr> <td>Chair, Diabetes UK's Diabetes Research Steering Group 6 focused on diabetes-related complications</td> <td>Unpaid</td> </tr> <tr> <td>Member, Greater Manchester's Diabetes Board, a strategic group with responsibility for funding of diabetes services across the region</td> <td>Unpaid</td> </tr> </table> |                                                                                     | Chair, European Diabetology, a charity supporting diabetes related education across Europe | Unpaid                                                           | Chair, Diabetes UK's Diabetes Research Steering Group 6 focused on diabetes-related complications | Unpaid | Member, Greater Manchester's Diabetes Board, a strategic group with responsibility for funding of diabetes services across the region | Unpaid |  |  |
| Chair, European Diabetology, a charity supporting diabetes related education across Europe                                            | Unpaid                                                                                                       |                                                                                                                                                                                                                                                                                                                                                                                                                                                                                                                    |                                                                                     |                                                                                            |                                                                  |                                                                                                   |        |                                                                                                                                       |        |  |  |
| Chair, Diabetes UK's Diabetes Research Steering Group 6 focused on diabetes-related complications                                     | Unpaid                                                                                                       |                                                                                                                                                                                                                                                                                                                                                                                                                                                                                                                    |                                                                                     |                                                                                            |                                                                  |                                                                                                   |        |                                                                                                                                       |        |  |  |
| Member, Greater Manchester's Diabetes Board, a strategic group with responsibility for funding of diabetes services across the region | Unpaid                                                                                                       |                                                                                                                                                                                                                                                                                                                                                                                                                                                                                                                    |                                                                                     |                                                                                            |                                                                  |                                                                                                   |        |                                                                                                                                       |        |  |  |



|                            |                                                                                  | Name all entities with whom you have this relationship or indicate none (add rows as needed)                                                                                            | Specifications/Comments (e.g., if payments were made to you or to your institution) |                            |  |  |  |  |  |
|----------------------------|----------------------------------------------------------------------------------|-----------------------------------------------------------------------------------------------------------------------------------------------------------------------------------------|-------------------------------------------------------------------------------------|----------------------------|--|--|--|--|--|
| <b>11</b>                  | Stock or stock options                                                           | <input type="checkbox"/> <b>None</b> <table border="1"> <tr> <td>Modest GSK stock ownership</td> <td></td> </tr> <tr> <td></td> <td></td> </tr> <tr> <td></td> <td></td> </tr> </table> |                                                                                     | Modest GSK stock ownership |  |  |  |  |  |
| Modest GSK stock ownership |                                                                                  |                                                                                                                                                                                         |                                                                                     |                            |  |  |  |  |  |
|                            |                                                                                  |                                                                                                                                                                                         |                                                                                     |                            |  |  |  |  |  |
|                            |                                                                                  |                                                                                                                                                                                         |                                                                                     |                            |  |  |  |  |  |
| <b>12</b>                  | Receipt of equipment, materials, drugs, medical writing, gifts or other services | <input checked="" type="checkbox"/> <b>None</b> <table border="1"> <tr> <td></td> <td></td> </tr> <tr> <td></td> <td></td> </tr> <tr> <td></td> <td></td> </tr> </table>                |                                                                                     |                            |  |  |  |  |  |
|                            |                                                                                  |                                                                                                                                                                                         |                                                                                     |                            |  |  |  |  |  |
|                            |                                                                                  |                                                                                                                                                                                         |                                                                                     |                            |  |  |  |  |  |
|                            |                                                                                  |                                                                                                                                                                                         |                                                                                     |                            |  |  |  |  |  |
| <b>13</b>                  | Other financial or non-financial interests                                       | <input checked="" type="checkbox"/> <b>None</b> <table border="1"> <tr> <td></td> <td></td> </tr> <tr> <td></td> <td></td> </tr> <tr> <td></td> <td></td> </tr> </table>                |                                                                                     |                            |  |  |  |  |  |
|                            |                                                                                  |                                                                                                                                                                                         |                                                                                     |                            |  |  |  |  |  |
|                            |                                                                                  |                                                                                                                                                                                         |                                                                                     |                            |  |  |  |  |  |
|                            |                                                                                  |                                                                                                                                                                                         |                                                                                     |                            |  |  |  |  |  |

**Please place an "X" next to the following statement to indicate your agreement:**

☒ I certify that I have answered every question and have not altered the wording of any of the questions on this form.

# ICMJE DISCLOSURE FORM

**Date:** 10/4/2022

**Your Name:** Thomas House

**Manuscript Title:** ClinCirc identifies alterations of the circadian peripheral oscillator in critical care patients

**Manuscript Number (if known):** 162775-JCI-CMED-1

In the interest of transparency, we ask you to disclose all relationships/activities/interests listed below that are related to the content of your manuscript. "Related" means any relation with for-profit or not-for-profit third parties whose interests may be affected by the content of the manuscript. Disclosure represents a commitment to transparency and does not necessarily indicate a bias. If you are in doubt about whether to list a relationship/activity/interest, it is preferable that you do so.

The author's relationships/activities/interests should be defined broadly. For example, if your manuscript pertains to the epidemiology of hypertension, you should declare all relationships with manufacturers of antihypertensive medication, even if that medication is not mentioned in the manuscript.

In item #1 below, report all support for the work reported in this manuscript without time limit. For all other items, the time frame for disclosure is the past 36 months.

|                                                           | Name all entities with whom you have this relationship or indicate none (add rows as needed)                                                                                   | Specifications/Comments (e.g., if payments were made to you or to your institution)                                                                                                                         |  |  |  |  |  |                                           |
|-----------------------------------------------------------|--------------------------------------------------------------------------------------------------------------------------------------------------------------------------------|-------------------------------------------------------------------------------------------------------------------------------------------------------------------------------------------------------------|--|--|--|--|--|-------------------------------------------|
| <b>Time frame: Since the initial planning of the work</b> |                                                                                                                                                                                |                                                                                                                                                                                                             |  |  |  |  |  |                                           |
| <b>1</b>                                                  | All support for the present manuscript (e.g., funding, provision of study materials, medical writing, article processing charges, etc.)<br><b>No time limit for this item.</b> | <input checked="" type="checkbox"/> <b>None</b><br><table border="1"> <tr><td></td><td></td></tr> <tr><td></td><td></td></tr> <tr><td></td><td>Click the tab key to add additional rows.</td></tr> </table> |  |  |  |  |  | Click the tab key to add additional rows. |
|                                                           |                                                                                                                                                                                |                                                                                                                                                                                                             |  |  |  |  |  |                                           |
|                                                           |                                                                                                                                                                                |                                                                                                                                                                                                             |  |  |  |  |  |                                           |
|                                                           | Click the tab key to add additional rows.                                                                                                                                      |                                                                                                                                                                                                             |  |  |  |  |  |                                           |
| <b>Time frame: past 36 months</b>                         |                                                                                                                                                                                |                                                                                                                                                                                                             |  |  |  |  |  |                                           |
| <b>2</b>                                                  | Grants or contracts from any entity (if not indicated in item #1 above).                                                                                                       | <input checked="" type="checkbox"/> <b>None</b><br><table border="1"> <tr><td></td><td></td></tr> <tr><td></td><td></td></tr> <tr><td></td><td></td></tr> </table>                                          |  |  |  |  |  |                                           |
|                                                           |                                                                                                                                                                                |                                                                                                                                                                                                             |  |  |  |  |  |                                           |
|                                                           |                                                                                                                                                                                |                                                                                                                                                                                                             |  |  |  |  |  |                                           |
|                                                           |                                                                                                                                                                                |                                                                                                                                                                                                             |  |  |  |  |  |                                           |
| <b>3</b>                                                  | Royalties or licenses                                                                                                                                                          | <input checked="" type="checkbox"/> <b>None</b><br><table border="1"> <tr><td></td><td></td></tr> <tr><td></td><td></td></tr> <tr><td></td><td></td></tr> </table>                                          |  |  |  |  |  |                                           |
|                                                           |                                                                                                                                                                                |                                                                                                                                                                                                             |  |  |  |  |  |                                           |
|                                                           |                                                                                                                                                                                |                                                                                                                                                                                                             |  |  |  |  |  |                                           |
|                                                           |                                                                                                                                                                                |                                                                                                                                                                                                             |  |  |  |  |  |                                           |

|    |                                                                                                              | Name all entities with whom you have this relationship or indicate none (add rows as needed)                                                                                                   | Specifications/Comments (e.g., if payments were made to you or to your institution) |  |  |  |  |  |  |  |  |
|----|--------------------------------------------------------------------------------------------------------------|------------------------------------------------------------------------------------------------------------------------------------------------------------------------------------------------|-------------------------------------------------------------------------------------|--|--|--|--|--|--|--|--|
| 4  | Consulting fees                                                                                              | <input checked="" type="checkbox"/> <b>None</b><br><table border="1"> <tr><td></td><td></td></tr> <tr><td></td><td></td></tr> <tr><td></td><td></td></tr> <tr><td></td><td></td></tr> </table> |                                                                                     |  |  |  |  |  |  |  |  |
|    |                                                                                                              |                                                                                                                                                                                                |                                                                                     |  |  |  |  |  |  |  |  |
|    |                                                                                                              |                                                                                                                                                                                                |                                                                                     |  |  |  |  |  |  |  |  |
|    |                                                                                                              |                                                                                                                                                                                                |                                                                                     |  |  |  |  |  |  |  |  |
|    |                                                                                                              |                                                                                                                                                                                                |                                                                                     |  |  |  |  |  |  |  |  |
| 5  | Payment or honoraria for lectures, presentations, speakers bureaus, manuscript writing or educational events | <input checked="" type="checkbox"/> <b>None</b><br><table border="1"> <tr><td></td><td></td></tr> <tr><td></td><td></td></tr> <tr><td></td><td></td></tr> </table>                             |                                                                                     |  |  |  |  |  |  |  |  |
|    |                                                                                                              |                                                                                                                                                                                                |                                                                                     |  |  |  |  |  |  |  |  |
|    |                                                                                                              |                                                                                                                                                                                                |                                                                                     |  |  |  |  |  |  |  |  |
|    |                                                                                                              |                                                                                                                                                                                                |                                                                                     |  |  |  |  |  |  |  |  |
| 6  | Payment for expert testimony                                                                                 | <input checked="" type="checkbox"/> <b>None</b><br><table border="1"> <tr><td></td><td></td></tr> <tr><td></td><td></td></tr> <tr><td></td><td></td></tr> </table>                             |                                                                                     |  |  |  |  |  |  |  |  |
|    |                                                                                                              |                                                                                                                                                                                                |                                                                                     |  |  |  |  |  |  |  |  |
|    |                                                                                                              |                                                                                                                                                                                                |                                                                                     |  |  |  |  |  |  |  |  |
|    |                                                                                                              |                                                                                                                                                                                                |                                                                                     |  |  |  |  |  |  |  |  |
| 7  | Support for attending meetings and/or travel                                                                 | <input checked="" type="checkbox"/> <b>None</b><br><table border="1"> <tr><td></td><td></td></tr> <tr><td></td><td></td></tr> <tr><td></td><td></td></tr> </table>                             |                                                                                     |  |  |  |  |  |  |  |  |
|    |                                                                                                              |                                                                                                                                                                                                |                                                                                     |  |  |  |  |  |  |  |  |
|    |                                                                                                              |                                                                                                                                                                                                |                                                                                     |  |  |  |  |  |  |  |  |
|    |                                                                                                              |                                                                                                                                                                                                |                                                                                     |  |  |  |  |  |  |  |  |
| 8  | Patents planned, issued or pending                                                                           | <input checked="" type="checkbox"/> <b>None</b><br><table border="1"> <tr><td></td><td></td></tr> <tr><td></td><td></td></tr> <tr><td></td><td></td></tr> </table>                             |                                                                                     |  |  |  |  |  |  |  |  |
|    |                                                                                                              |                                                                                                                                                                                                |                                                                                     |  |  |  |  |  |  |  |  |
|    |                                                                                                              |                                                                                                                                                                                                |                                                                                     |  |  |  |  |  |  |  |  |
|    |                                                                                                              |                                                                                                                                                                                                |                                                                                     |  |  |  |  |  |  |  |  |
| 9  | Participation on a Data Safety Monitoring Board or Advisory Board                                            | <input checked="" type="checkbox"/> <b>None</b><br><table border="1"> <tr><td></td><td></td></tr> <tr><td></td><td></td></tr> <tr><td></td><td></td></tr> </table>                             |                                                                                     |  |  |  |  |  |  |  |  |
|    |                                                                                                              |                                                                                                                                                                                                |                                                                                     |  |  |  |  |  |  |  |  |
|    |                                                                                                              |                                                                                                                                                                                                |                                                                                     |  |  |  |  |  |  |  |  |
|    |                                                                                                              |                                                                                                                                                                                                |                                                                                     |  |  |  |  |  |  |  |  |
| 10 | Leadership or fiduciary role in other board, society, committee or advocacy group, paid or unpaid            | <input checked="" type="checkbox"/> <b>None</b><br><table border="1"> <tr><td></td><td></td></tr> <tr><td></td><td></td></tr> <tr><td></td><td></td></tr> </table>                             |                                                                                     |  |  |  |  |  |  |  |  |
|    |                                                                                                              |                                                                                                                                                                                                |                                                                                     |  |  |  |  |  |  |  |  |
|    |                                                                                                              |                                                                                                                                                                                                |                                                                                     |  |  |  |  |  |  |  |  |
|    |                                                                                                              |                                                                                                                                                                                                |                                                                                     |  |  |  |  |  |  |  |  |

|           |                                                                                  | Name all entities with whom you have this relationship or indicate none (add rows as needed)                                                                                                          | Specifications/Comments (e.g., if payments were made to you or to your institution) |  |  |  |  |  |  |
|-----------|----------------------------------------------------------------------------------|-------------------------------------------------------------------------------------------------------------------------------------------------------------------------------------------------------|-------------------------------------------------------------------------------------|--|--|--|--|--|--|
| <b>11</b> | Stock or stock options                                                           | <input checked="" type="checkbox"/> <b>None</b> <table border="1" style="width: 100%; margin-top: 5px;"> <tr><td></td><td></td></tr> <tr><td></td><td></td></tr> <tr><td></td><td></td></tr> </table> |                                                                                     |  |  |  |  |  |  |
|           |                                                                                  |                                                                                                                                                                                                       |                                                                                     |  |  |  |  |  |  |
|           |                                                                                  |                                                                                                                                                                                                       |                                                                                     |  |  |  |  |  |  |
|           |                                                                                  |                                                                                                                                                                                                       |                                                                                     |  |  |  |  |  |  |
| <b>12</b> | Receipt of equipment, materials, drugs, medical writing, gifts or other services | <input checked="" type="checkbox"/> <b>None</b> <table border="1" style="width: 100%; margin-top: 5px;"> <tr><td></td><td></td></tr> <tr><td></td><td></td></tr> <tr><td></td><td></td></tr> </table> |                                                                                     |  |  |  |  |  |  |
|           |                                                                                  |                                                                                                                                                                                                       |                                                                                     |  |  |  |  |  |  |
|           |                                                                                  |                                                                                                                                                                                                       |                                                                                     |  |  |  |  |  |  |
|           |                                                                                  |                                                                                                                                                                                                       |                                                                                     |  |  |  |  |  |  |
| <b>13</b> | Other financial or non-financial interests                                       | <input checked="" type="checkbox"/> <b>None</b> <table border="1" style="width: 100%; margin-top: 5px;"> <tr><td></td><td></td></tr> <tr><td></td><td></td></tr> <tr><td></td><td></td></tr> </table> |                                                                                     |  |  |  |  |  |  |
|           |                                                                                  |                                                                                                                                                                                                       |                                                                                     |  |  |  |  |  |  |
|           |                                                                                  |                                                                                                                                                                                                       |                                                                                     |  |  |  |  |  |  |
|           |                                                                                  |                                                                                                                                                                                                       |                                                                                     |  |  |  |  |  |  |

**Please place an "X" next to the following statement to indicate your agreement:**

☒ I certify that I have answered every question and have not altered the wording of any of the questions on this form.

# ICMJE DISCLOSURE FORM

**Date:** 9/25/2022

**Your Name:** Paul Dark

**Manuscript Title:** ClinCirc identifies alterations of the circadian peripheral oscillator in critical care patients

**Manuscript Number (if known):** 162775-JCI-CMED-1

In the interest of transparency, we ask you to disclose all relationships/activities/interests listed below that are related to the content of your manuscript. "Related" means any relation with for-profit or not-for-profit third parties whose interests may be affected by the content of the manuscript. Disclosure represents a commitment to transparency and does not necessarily indicate a bias. If you are in doubt about whether to list a relationship/activity/interest, it is preferable that you do so.

The author's relationships/activities/interests should be defined broadly. For example, if your manuscript pertains to the epidemiology of hypertension, you should declare all relationships with manufacturers of antihypertensive medication, even if that medication is not mentioned in the manuscript.

In item #1 below, report all support for the work reported in this manuscript without time limit. For all other items, the time frame for disclosure is the past 36 months.

|                                                           | Name all entities with whom you have this relationship or indicate none (add rows as needed)                                                                                   | Specifications/Comments (e.g., if payments were made to you or to your institution)                                                                                                                         |  |  |  |  |  |                                           |
|-----------------------------------------------------------|--------------------------------------------------------------------------------------------------------------------------------------------------------------------------------|-------------------------------------------------------------------------------------------------------------------------------------------------------------------------------------------------------------|--|--|--|--|--|-------------------------------------------|
| <b>Time frame: Since the initial planning of the work</b> |                                                                                                                                                                                |                                                                                                                                                                                                             |  |  |  |  |  |                                           |
| <b>1</b>                                                  | All support for the present manuscript (e.g., funding, provision of study materials, medical writing, article processing charges, etc.)<br><b>No time limit for this item.</b> | <input checked="" type="checkbox"/> <b>None</b><br><table border="1"> <tr><td></td><td></td></tr> <tr><td></td><td></td></tr> <tr><td></td><td>Click the tab key to add additional rows.</td></tr> </table> |  |  |  |  |  | Click the tab key to add additional rows. |
|                                                           |                                                                                                                                                                                |                                                                                                                                                                                                             |  |  |  |  |  |                                           |
|                                                           |                                                                                                                                                                                |                                                                                                                                                                                                             |  |  |  |  |  |                                           |
|                                                           | Click the tab key to add additional rows.                                                                                                                                      |                                                                                                                                                                                                             |  |  |  |  |  |                                           |
| <b>Time frame: past 36 months</b>                         |                                                                                                                                                                                |                                                                                                                                                                                                             |  |  |  |  |  |                                           |
| <b>2</b>                                                  | Grants or contracts from any entity (if not indicated in item #1 above).                                                                                                       | <input checked="" type="checkbox"/> <b>None</b><br><table border="1"> <tr><td></td><td></td></tr> <tr><td></td><td></td></tr> <tr><td></td><td></td></tr> </table>                                          |  |  |  |  |  |                                           |
|                                                           |                                                                                                                                                                                |                                                                                                                                                                                                             |  |  |  |  |  |                                           |
|                                                           |                                                                                                                                                                                |                                                                                                                                                                                                             |  |  |  |  |  |                                           |
|                                                           |                                                                                                                                                                                |                                                                                                                                                                                                             |  |  |  |  |  |                                           |
| <b>3</b>                                                  | Royalties or licenses                                                                                                                                                          | <input checked="" type="checkbox"/> <b>None</b><br><table border="1"> <tr><td></td><td></td></tr> <tr><td></td><td></td></tr> <tr><td></td><td></td></tr> </table>                                          |  |  |  |  |  |                                           |
|                                                           |                                                                                                                                                                                |                                                                                                                                                                                                             |  |  |  |  |  |                                           |
|                                                           |                                                                                                                                                                                |                                                                                                                                                                                                             |  |  |  |  |  |                                           |
|                                                           |                                                                                                                                                                                |                                                                                                                                                                                                             |  |  |  |  |  |                                           |

|                                                                                                                           |                                                                                                                                | Name all entities with whom you have this relationship or indicate none (add rows as needed)                                                                                                                                                                                                                                                                                                                                                                                                                                            | Specifications/Comments (e.g., if payments were made to you or to your institution)                                       |                                                                                                                                |                          |                      |                                                  |                      |  |  |  |
|---------------------------------------------------------------------------------------------------------------------------|--------------------------------------------------------------------------------------------------------------------------------|-----------------------------------------------------------------------------------------------------------------------------------------------------------------------------------------------------------------------------------------------------------------------------------------------------------------------------------------------------------------------------------------------------------------------------------------------------------------------------------------------------------------------------------------|---------------------------------------------------------------------------------------------------------------------------|--------------------------------------------------------------------------------------------------------------------------------|--------------------------|----------------------|--------------------------------------------------|----------------------|--|--|--|
| 4                                                                                                                         | Consulting fees                                                                                                                | <input checked="" type="checkbox"/> <b>None</b><br><table border="1"> <tr><td></td><td></td></tr> <tr><td></td><td></td></tr> <tr><td></td><td></td></tr> <tr><td></td><td></td></tr> </table>                                                                                                                                                                                                                                                                                                                                          |                                                                                                                           |                                                                                                                                |                          |                      |                                                  |                      |  |  |  |
|                                                                                                                           |                                                                                                                                |                                                                                                                                                                                                                                                                                                                                                                                                                                                                                                                                         |                                                                                                                           |                                                                                                                                |                          |                      |                                                  |                      |  |  |  |
|                                                                                                                           |                                                                                                                                |                                                                                                                                                                                                                                                                                                                                                                                                                                                                                                                                         |                                                                                                                           |                                                                                                                                |                          |                      |                                                  |                      |  |  |  |
|                                                                                                                           |                                                                                                                                |                                                                                                                                                                                                                                                                                                                                                                                                                                                                                                                                         |                                                                                                                           |                                                                                                                                |                          |                      |                                                  |                      |  |  |  |
|                                                                                                                           |                                                                                                                                |                                                                                                                                                                                                                                                                                                                                                                                                                                                                                                                                         |                                                                                                                           |                                                                                                                                |                          |                      |                                                  |                      |  |  |  |
| 5                                                                                                                         | Payment or honoraria for lectures, presentations, speakers bureaus, manuscript writing or educational events                   | <input checked="" type="checkbox"/> <b>None</b><br><table border="1"> <tr><td></td><td></td></tr> <tr><td></td><td></td></tr> <tr><td></td><td></td></tr> </table>                                                                                                                                                                                                                                                                                                                                                                      |                                                                                                                           |                                                                                                                                |                          |                      |                                                  |                      |  |  |  |
|                                                                                                                           |                                                                                                                                |                                                                                                                                                                                                                                                                                                                                                                                                                                                                                                                                         |                                                                                                                           |                                                                                                                                |                          |                      |                                                  |                      |  |  |  |
|                                                                                                                           |                                                                                                                                |                                                                                                                                                                                                                                                                                                                                                                                                                                                                                                                                         |                                                                                                                           |                                                                                                                                |                          |                      |                                                  |                      |  |  |  |
|                                                                                                                           |                                                                                                                                |                                                                                                                                                                                                                                                                                                                                                                                                                                                                                                                                         |                                                                                                                           |                                                                                                                                |                          |                      |                                                  |                      |  |  |  |
| 6                                                                                                                         | Payment for expert testimony                                                                                                   | <input checked="" type="checkbox"/> <b>None</b><br><table border="1"> <tr><td></td><td></td></tr> <tr><td></td><td></td></tr> <tr><td></td><td></td></tr> </table>                                                                                                                                                                                                                                                                                                                                                                      |                                                                                                                           |                                                                                                                                |                          |                      |                                                  |                      |  |  |  |
|                                                                                                                           |                                                                                                                                |                                                                                                                                                                                                                                                                                                                                                                                                                                                                                                                                         |                                                                                                                           |                                                                                                                                |                          |                      |                                                  |                      |  |  |  |
|                                                                                                                           |                                                                                                                                |                                                                                                                                                                                                                                                                                                                                                                                                                                                                                                                                         |                                                                                                                           |                                                                                                                                |                          |                      |                                                  |                      |  |  |  |
|                                                                                                                           |                                                                                                                                |                                                                                                                                                                                                                                                                                                                                                                                                                                                                                                                                         |                                                                                                                           |                                                                                                                                |                          |                      |                                                  |                      |  |  |  |
| 7                                                                                                                         | Support for attending meetings and/or travel                                                                                   | <input checked="" type="checkbox"/> <b>None</b><br><table border="1"> <tr><td></td><td></td></tr> <tr><td></td><td></td></tr> <tr><td></td><td></td></tr> </table>                                                                                                                                                                                                                                                                                                                                                                      |                                                                                                                           |                                                                                                                                |                          |                      |                                                  |                      |  |  |  |
|                                                                                                                           |                                                                                                                                |                                                                                                                                                                                                                                                                                                                                                                                                                                                                                                                                         |                                                                                                                           |                                                                                                                                |                          |                      |                                                  |                      |  |  |  |
|                                                                                                                           |                                                                                                                                |                                                                                                                                                                                                                                                                                                                                                                                                                                                                                                                                         |                                                                                                                           |                                                                                                                                |                          |                      |                                                  |                      |  |  |  |
|                                                                                                                           |                                                                                                                                |                                                                                                                                                                                                                                                                                                                                                                                                                                                                                                                                         |                                                                                                                           |                                                                                                                                |                          |                      |                                                  |                      |  |  |  |
| 8                                                                                                                         | Patents planned, issued or pending                                                                                             | <input checked="" type="checkbox"/> <b>None</b><br><table border="1"> <tr><td></td><td></td></tr> <tr><td></td><td></td></tr> <tr><td></td><td></td></tr> </table>                                                                                                                                                                                                                                                                                                                                                                      |                                                                                                                           |                                                                                                                                |                          |                      |                                                  |                      |  |  |  |
|                                                                                                                           |                                                                                                                                |                                                                                                                                                                                                                                                                                                                                                                                                                                                                                                                                         |                                                                                                                           |                                                                                                                                |                          |                      |                                                  |                      |  |  |  |
|                                                                                                                           |                                                                                                                                |                                                                                                                                                                                                                                                                                                                                                                                                                                                                                                                                         |                                                                                                                           |                                                                                                                                |                          |                      |                                                  |                      |  |  |  |
|                                                                                                                           |                                                                                                                                |                                                                                                                                                                                                                                                                                                                                                                                                                                                                                                                                         |                                                                                                                           |                                                                                                                                |                          |                      |                                                  |                      |  |  |  |
| 9                                                                                                                         | Participation on a Data Safety Monitoring Board or Advisory Board                                                              | <input checked="" type="checkbox"/> <b>None</b><br><table border="1"> <tr><td></td><td></td></tr> <tr><td></td><td></td></tr> <tr><td></td><td></td></tr> </table>                                                                                                                                                                                                                                                                                                                                                                      |                                                                                                                           |                                                                                                                                |                          |                      |                                                  |                      |  |  |  |
|                                                                                                                           |                                                                                                                                |                                                                                                                                                                                                                                                                                                                                                                                                                                                                                                                                         |                                                                                                                           |                                                                                                                                |                          |                      |                                                  |                      |  |  |  |
|                                                                                                                           |                                                                                                                                |                                                                                                                                                                                                                                                                                                                                                                                                                                                                                                                                         |                                                                                                                           |                                                                                                                                |                          |                      |                                                  |                      |  |  |  |
|                                                                                                                           |                                                                                                                                |                                                                                                                                                                                                                                                                                                                                                                                                                                                                                                                                         |                                                                                                                           |                                                                                                                                |                          |                      |                                                  |                      |  |  |  |
| 10                                                                                                                        | Leadership or fiduciary role in other board, society, committee or advocacy group, paid or unpaid                              | <input type="checkbox"/> <b>None</b><br><table border="1"> <tr> <td>Deputy Medical Director, National Coordinating Centre, National Institute for Health and Care Research (NIHR), London, UK</td> <td>0.5 full time equivalent back-fill funding for my employer (University of Manchester) to facilitate my secondment to the NIHR.</td> </tr> <tr> <td>NIHR Senior Investigator</td> <td>Award to my employer</td> </tr> <tr> <td>NIHR Manchester Biomedical Research Centre award</td> <td>Award to my employer</td> </tr> </table> | Deputy Medical Director, National Coordinating Centre, National Institute for Health and Care Research (NIHR), London, UK | 0.5 full time equivalent back-fill funding for my employer (University of Manchester) to facilitate my secondment to the NIHR. | NIHR Senior Investigator | Award to my employer | NIHR Manchester Biomedical Research Centre award | Award to my employer |  |  |  |
| Deputy Medical Director, National Coordinating Centre, National Institute for Health and Care Research (NIHR), London, UK | 0.5 full time equivalent back-fill funding for my employer (University of Manchester) to facilitate my secondment to the NIHR. |                                                                                                                                                                                                                                                                                                                                                                                                                                                                                                                                         |                                                                                                                           |                                                                                                                                |                          |                      |                                                  |                      |  |  |  |
| NIHR Senior Investigator                                                                                                  | Award to my employer                                                                                                           |                                                                                                                                                                                                                                                                                                                                                                                                                                                                                                                                         |                                                                                                                           |                                                                                                                                |                          |                      |                                                  |                      |  |  |  |
| NIHR Manchester Biomedical Research Centre award                                                                          | Award to my employer                                                                                                           |                                                                                                                                                                                                                                                                                                                                                                                                                                                                                                                                         |                                                                                                                           |                                                                                                                                |                          |                      |                                                  |                      |  |  |  |

|           |                                                                                  | Name all entities with whom you have this relationship or indicate none (add rows as needed)                                                                                                           | Specifications/Comments (e.g., if payments were made to you or to your institution) |  |  |  |  |  |  |
|-----------|----------------------------------------------------------------------------------|--------------------------------------------------------------------------------------------------------------------------------------------------------------------------------------------------------|-------------------------------------------------------------------------------------|--|--|--|--|--|--|
| <b>11</b> | Stock or stock options                                                           | <input checked="" type="checkbox"/> <b>None</b> <table border="1" style="width: 100%; margin-top: 10px;"> <tr><td></td><td></td></tr> <tr><td></td><td></td></tr> <tr><td></td><td></td></tr> </table> |                                                                                     |  |  |  |  |  |  |
|           |                                                                                  |                                                                                                                                                                                                        |                                                                                     |  |  |  |  |  |  |
|           |                                                                                  |                                                                                                                                                                                                        |                                                                                     |  |  |  |  |  |  |
|           |                                                                                  |                                                                                                                                                                                                        |                                                                                     |  |  |  |  |  |  |
| <b>12</b> | Receipt of equipment, materials, drugs, medical writing, gifts or other services | <input checked="" type="checkbox"/> <b>None</b> <table border="1" style="width: 100%; margin-top: 10px;"> <tr><td></td><td></td></tr> <tr><td></td><td></td></tr> <tr><td></td><td></td></tr> </table> |                                                                                     |  |  |  |  |  |  |
|           |                                                                                  |                                                                                                                                                                                                        |                                                                                     |  |  |  |  |  |  |
|           |                                                                                  |                                                                                                                                                                                                        |                                                                                     |  |  |  |  |  |  |
|           |                                                                                  |                                                                                                                                                                                                        |                                                                                     |  |  |  |  |  |  |
| <b>13</b> | Other financial or non-financial interests                                       | <input checked="" type="checkbox"/> <b>None</b> <table border="1" style="width: 100%; margin-top: 10px;"> <tr><td></td><td></td></tr> <tr><td></td><td></td></tr> <tr><td></td><td></td></tr> </table> |                                                                                     |  |  |  |  |  |  |
|           |                                                                                  |                                                                                                                                                                                                        |                                                                                     |  |  |  |  |  |  |
|           |                                                                                  |                                                                                                                                                                                                        |                                                                                     |  |  |  |  |  |  |
|           |                                                                                  |                                                                                                                                                                                                        |                                                                                     |  |  |  |  |  |  |

**Please place an "X" next to the following statement to indicate your agreement:**

☒ I certify that I have answered every question and have not altered the wording of any of the questions on this form.

# ICMJE DISCLOSURE FORM

**Date:** 9/30/2022

**Your Name:** Titus Augustine

**Manuscript Title:** ClinCirc identifies alterations of the circadian peripheral oscillator in critical care patients

**Manuscript Number (if known):** 162775-JCI-CMED-1

In the interest of transparency, we ask you to disclose all relationships/activities/interests listed below that are related to the content of your manuscript. "Related" means any relation with for-profit or not-for-profit third parties whose interests may be affected by the content of the manuscript. Disclosure represents a commitment to transparency and does not necessarily indicate a bias. If you are in doubt about whether to list a relationship/activity/interest, it is preferable that you do so.

The author's relationships/activities/interests should be defined broadly. For example, if your manuscript pertains to the epidemiology of hypertension, you should declare all relationships with manufacturers of antihypertensive medication, even if that medication is not mentioned in the manuscript.

In item #1 below, report all support for the work reported in this manuscript without time limit. For all other items, the time frame for disclosure is the past 36 months.

|                                                           | Name all entities with whom you have this relationship or indicate none (add rows as needed)                                                                                   | Specifications/Comments (e.g., if payments were made to you or to your institution)                                                                                                                         |  |  |  |  |  |                                           |
|-----------------------------------------------------------|--------------------------------------------------------------------------------------------------------------------------------------------------------------------------------|-------------------------------------------------------------------------------------------------------------------------------------------------------------------------------------------------------------|--|--|--|--|--|-------------------------------------------|
| <b>Time frame: Since the initial planning of the work</b> |                                                                                                                                                                                |                                                                                                                                                                                                             |  |  |  |  |  |                                           |
| <b>1</b>                                                  | All support for the present manuscript (e.g., funding, provision of study materials, medical writing, article processing charges, etc.)<br><b>No time limit for this item.</b> | <input checked="" type="checkbox"/> <b>None</b><br><table border="1"> <tr><td></td><td></td></tr> <tr><td></td><td></td></tr> <tr><td></td><td>Click the tab key to add additional rows.</td></tr> </table> |  |  |  |  |  | Click the tab key to add additional rows. |
|                                                           |                                                                                                                                                                                |                                                                                                                                                                                                             |  |  |  |  |  |                                           |
|                                                           |                                                                                                                                                                                |                                                                                                                                                                                                             |  |  |  |  |  |                                           |
|                                                           | Click the tab key to add additional rows.                                                                                                                                      |                                                                                                                                                                                                             |  |  |  |  |  |                                           |
| <b>Time frame: past 36 months</b>                         |                                                                                                                                                                                |                                                                                                                                                                                                             |  |  |  |  |  |                                           |
| <b>2</b>                                                  | Grants or contracts from any entity (if not indicated in item #1 above).                                                                                                       | <input checked="" type="checkbox"/> <b>None</b><br><table border="1"> <tr><td></td><td></td></tr> <tr><td></td><td></td></tr> <tr><td></td><td></td></tr> </table>                                          |  |  |  |  |  |                                           |
|                                                           |                                                                                                                                                                                |                                                                                                                                                                                                             |  |  |  |  |  |                                           |
|                                                           |                                                                                                                                                                                |                                                                                                                                                                                                             |  |  |  |  |  |                                           |
|                                                           |                                                                                                                                                                                |                                                                                                                                                                                                             |  |  |  |  |  |                                           |
| <b>3</b>                                                  | Royalties or licenses                                                                                                                                                          | <input checked="" type="checkbox"/> <b>None</b><br><table border="1"> <tr><td></td><td></td></tr> <tr><td></td><td></td></tr> <tr><td></td><td></td></tr> </table>                                          |  |  |  |  |  |                                           |
|                                                           |                                                                                                                                                                                |                                                                                                                                                                                                             |  |  |  |  |  |                                           |
|                                                           |                                                                                                                                                                                |                                                                                                                                                                                                             |  |  |  |  |  |                                           |
|                                                           |                                                                                                                                                                                |                                                                                                                                                                                                             |  |  |  |  |  |                                           |



|                                                                                                                        |                                                                                                              | Name all entities with whom you have this relationship or indicate none (add rows as needed)                                                                                                                                                                                                                   | Specifications/Comments (e.g., if payments were made to you or to your institution) |                                                                                                                        |                                                                                                 |  |  |  |  |  |  |
|------------------------------------------------------------------------------------------------------------------------|--------------------------------------------------------------------------------------------------------------|----------------------------------------------------------------------------------------------------------------------------------------------------------------------------------------------------------------------------------------------------------------------------------------------------------------|-------------------------------------------------------------------------------------|------------------------------------------------------------------------------------------------------------------------|-------------------------------------------------------------------------------------------------|--|--|--|--|--|--|
| 4                                                                                                                      | Consulting fees                                                                                              | <input checked="" type="checkbox"/> <b>None</b><br><table border="1"> <tr><td></td><td></td></tr> <tr><td></td><td></td></tr> <tr><td></td><td></td></tr> <tr><td></td><td></td></tr> </table>                                                                                                                 |                                                                                     |                                                                                                                        |                                                                                                 |  |  |  |  |  |  |
|                                                                                                                        |                                                                                                              |                                                                                                                                                                                                                                                                                                                |                                                                                     |                                                                                                                        |                                                                                                 |  |  |  |  |  |  |
|                                                                                                                        |                                                                                                              |                                                                                                                                                                                                                                                                                                                |                                                                                     |                                                                                                                        |                                                                                                 |  |  |  |  |  |  |
|                                                                                                                        |                                                                                                              |                                                                                                                                                                                                                                                                                                                |                                                                                     |                                                                                                                        |                                                                                                 |  |  |  |  |  |  |
|                                                                                                                        |                                                                                                              |                                                                                                                                                                                                                                                                                                                |                                                                                     |                                                                                                                        |                                                                                                 |  |  |  |  |  |  |
| 5                                                                                                                      | Payment or honoraria for lectures, presentations, speakers bureaus, manuscript writing or educational events | <input checked="" type="checkbox"/> <b>None</b><br><table border="1"> <tr><td></td><td></td></tr> <tr><td></td><td></td></tr> <tr><td></td><td></td></tr> </table>                                                                                                                                             |                                                                                     |                                                                                                                        |                                                                                                 |  |  |  |  |  |  |
|                                                                                                                        |                                                                                                              |                                                                                                                                                                                                                                                                                                                |                                                                                     |                                                                                                                        |                                                                                                 |  |  |  |  |  |  |
|                                                                                                                        |                                                                                                              |                                                                                                                                                                                                                                                                                                                |                                                                                     |                                                                                                                        |                                                                                                 |  |  |  |  |  |  |
|                                                                                                                        |                                                                                                              |                                                                                                                                                                                                                                                                                                                |                                                                                     |                                                                                                                        |                                                                                                 |  |  |  |  |  |  |
| 6                                                                                                                      | Payment for expert testimony                                                                                 | <input checked="" type="checkbox"/> <b>None</b><br><table border="1"> <tr><td></td><td></td></tr> <tr><td></td><td></td></tr> <tr><td></td><td></td></tr> </table>                                                                                                                                             |                                                                                     |                                                                                                                        |                                                                                                 |  |  |  |  |  |  |
|                                                                                                                        |                                                                                                              |                                                                                                                                                                                                                                                                                                                |                                                                                     |                                                                                                                        |                                                                                                 |  |  |  |  |  |  |
|                                                                                                                        |                                                                                                              |                                                                                                                                                                                                                                                                                                                |                                                                                     |                                                                                                                        |                                                                                                 |  |  |  |  |  |  |
|                                                                                                                        |                                                                                                              |                                                                                                                                                                                                                                                                                                                |                                                                                     |                                                                                                                        |                                                                                                 |  |  |  |  |  |  |
| 7                                                                                                                      | Support for attending meetings and/or travel                                                                 | <input checked="" type="checkbox"/> <b>None</b><br><table border="1"> <tr><td></td><td></td></tr> <tr><td></td><td></td></tr> <tr><td></td><td></td></tr> </table>                                                                                                                                             |                                                                                     |                                                                                                                        |                                                                                                 |  |  |  |  |  |  |
|                                                                                                                        |                                                                                                              |                                                                                                                                                                                                                                                                                                                |                                                                                     |                                                                                                                        |                                                                                                 |  |  |  |  |  |  |
|                                                                                                                        |                                                                                                              |                                                                                                                                                                                                                                                                                                                |                                                                                     |                                                                                                                        |                                                                                                 |  |  |  |  |  |  |
|                                                                                                                        |                                                                                                              |                                                                                                                                                                                                                                                                                                                |                                                                                     |                                                                                                                        |                                                                                                 |  |  |  |  |  |  |
| 8                                                                                                                      | Patents planned, issued or pending                                                                           | <input checked="" type="checkbox"/> <b>None</b><br><table border="1"> <tr> <td>INFLATABLE LAPAROSPHERE USA PATENT 9592042</td> <td>Named inventor, however patent proprietor; Institution. Central Manchester University Hospitals</td> </tr> <tr><td></td><td></td></tr> <tr><td></td><td></td></tr> </table> |                                                                                     | INFLATABLE LAPAROSPHERE USA PATENT 9592042                                                                             | Named inventor, however patent proprietor; Institution. Central Manchester University Hospitals |  |  |  |  |  |  |
| INFLATABLE LAPAROSPHERE USA PATENT 9592042                                                                             | Named inventor, however patent proprietor; Institution. Central Manchester University Hospitals              |                                                                                                                                                                                                                                                                                                                |                                                                                     |                                                                                                                        |                                                                                                 |  |  |  |  |  |  |
|                                                                                                                        |                                                                                                              |                                                                                                                                                                                                                                                                                                                |                                                                                     |                                                                                                                        |                                                                                                 |  |  |  |  |  |  |
|                                                                                                                        |                                                                                                              |                                                                                                                                                                                                                                                                                                                |                                                                                     |                                                                                                                        |                                                                                                 |  |  |  |  |  |  |
| 9                                                                                                                      | Participation on a Data Safety Monitoring Board or Advisory Board                                            | <input checked="" type="checkbox"/> <b>None</b><br><table border="1"> <tr> <td>Paid Participation in Advisory Board of Natera. On the diagnostic role of Cell free DNA in Kidney Transplantation 2021</td> <td>Paid to me</td> </tr> <tr><td></td><td></td></tr> <tr><td></td><td></td></tr> </table>          |                                                                                     | Paid Participation in Advisory Board of Natera. On the diagnostic role of Cell free DNA in Kidney Transplantation 2021 | Paid to me                                                                                      |  |  |  |  |  |  |
| Paid Participation in Advisory Board of Natera. On the diagnostic role of Cell free DNA in Kidney Transplantation 2021 | Paid to me                                                                                                   |                                                                                                                                                                                                                                                                                                                |                                                                                     |                                                                                                                        |                                                                                                 |  |  |  |  |  |  |
|                                                                                                                        |                                                                                                              |                                                                                                                                                                                                                                                                                                                |                                                                                     |                                                                                                                        |                                                                                                 |  |  |  |  |  |  |
|                                                                                                                        |                                                                                                              |                                                                                                                                                                                                                                                                                                                |                                                                                     |                                                                                                                        |                                                                                                 |  |  |  |  |  |  |
| 10                                                                                                                     | Leadership or fiduciary role in other board, society, committee or advocacy group, paid or unpaid            | <input checked="" type="checkbox"/> <b>None</b><br><table border="1"> <tr><td></td><td></td></tr> <tr><td></td><td></td></tr> <tr><td></td><td></td></tr> </table>                                                                                                                                             |                                                                                     |                                                                                                                        |                                                                                                 |  |  |  |  |  |  |
|                                                                                                                        |                                                                                                              |                                                                                                                                                                                                                                                                                                                |                                                                                     |                                                                                                                        |                                                                                                 |  |  |  |  |  |  |
|                                                                                                                        |                                                                                                              |                                                                                                                                                                                                                                                                                                                |                                                                                     |                                                                                                                        |                                                                                                 |  |  |  |  |  |  |
|                                                                                                                        |                                                                                                              |                                                                                                                                                                                                                                                                                                                |                                                                                     |                                                                                                                        |                                                                                                 |  |  |  |  |  |  |

|           |                                                                                  | Name all entities with whom you have this relationship or indicate none (add rows as needed) | Specifications/Comments (e.g., if payments were made to you or to your institution) |
|-----------|----------------------------------------------------------------------------------|----------------------------------------------------------------------------------------------|-------------------------------------------------------------------------------------|
| <b>11</b> | Stock or stock options                                                           | <input checked="" type="checkbox"/> <b>None</b>                                              |                                                                                     |
|           |                                                                                  |                                                                                              |                                                                                     |
|           |                                                                                  |                                                                                              |                                                                                     |
|           |                                                                                  |                                                                                              |                                                                                     |
| <b>12</b> | Receipt of equipment, materials, drugs, medical writing, gifts or other services | <input checked="" type="checkbox"/> <b>None</b>                                              |                                                                                     |
|           |                                                                                  |                                                                                              |                                                                                     |
|           |                                                                                  |                                                                                              |                                                                                     |
|           |                                                                                  |                                                                                              |                                                                                     |
| <b>13</b> | Other financial or non-financial interests                                       | <input checked="" type="checkbox"/> <b>None</b>                                              |                                                                                     |
|           |                                                                                  |                                                                                              |                                                                                     |
|           |                                                                                  |                                                                                              |                                                                                     |
|           |                                                                                  |                                                                                              |                                                                                     |

**Please place an "X" next to the following statement to indicate your agreement:**

☒ I certify that I have answered every question and have not altered the wording of any of the questions on this form.

# ICMJE DISCLOSURE FORM

**Date:** 9/22/2022

**Your Name:** Ozgur E. Akman

**Manuscript Title:** ClinCirc identifies alterations of the circadian peripheral oscillator in critical care patients

**Manuscript Number (if known):** 162775-JCI-CMED-1

In the interest of transparency, we ask you to disclose all relationships/activities/interests listed below that are related to the content of your manuscript. "Related" means any relation with for-profit or not-for-profit third parties whose interests may be affected by the content of the manuscript. Disclosure represents a commitment to transparency and does not necessarily indicate a bias. If you are in doubt about whether to list a relationship/activity/interest, it is preferable that you do so.

The author's relationships/activities/interests should be defined broadly. For example, if your manuscript pertains to the epidemiology of hypertension, you should declare all relationships with manufacturers of antihypertensive medication, even if that medication is not mentioned in the manuscript.

In item #1 below, report all support for the work reported in this manuscript without time limit. For all other items, the time frame for disclosure is the past 36 months.

|                                                           | Name all entities with whom you have this relationship or indicate none (add rows as needed)                                                                                   | Specifications/Comments (e.g., if payments were made to you or to your institution)                                                                                                                         |  |  |  |  |  |                                           |
|-----------------------------------------------------------|--------------------------------------------------------------------------------------------------------------------------------------------------------------------------------|-------------------------------------------------------------------------------------------------------------------------------------------------------------------------------------------------------------|--|--|--|--|--|-------------------------------------------|
| <b>Time frame: Since the initial planning of the work</b> |                                                                                                                                                                                |                                                                                                                                                                                                             |  |  |  |  |  |                                           |
| <b>1</b>                                                  | All support for the present manuscript (e.g., funding, provision of study materials, medical writing, article processing charges, etc.)<br><b>No time limit for this item.</b> | <input checked="" type="checkbox"/> <b>None</b><br><table border="1"> <tr><td></td><td></td></tr> <tr><td></td><td></td></tr> <tr><td></td><td>Click the tab key to add additional rows.</td></tr> </table> |  |  |  |  |  | Click the tab key to add additional rows. |
|                                                           |                                                                                                                                                                                |                                                                                                                                                                                                             |  |  |  |  |  |                                           |
|                                                           |                                                                                                                                                                                |                                                                                                                                                                                                             |  |  |  |  |  |                                           |
|                                                           | Click the tab key to add additional rows.                                                                                                                                      |                                                                                                                                                                                                             |  |  |  |  |  |                                           |
| <b>Time frame: past 36 months</b>                         |                                                                                                                                                                                |                                                                                                                                                                                                             |  |  |  |  |  |                                           |
| <b>2</b>                                                  | Grants or contracts from any entity (if not indicated in item #1 above).                                                                                                       | <input checked="" type="checkbox"/> <b>None</b><br><table border="1"> <tr><td></td><td></td></tr> <tr><td></td><td></td></tr> <tr><td></td><td></td></tr> </table>                                          |  |  |  |  |  |                                           |
|                                                           |                                                                                                                                                                                |                                                                                                                                                                                                             |  |  |  |  |  |                                           |
|                                                           |                                                                                                                                                                                |                                                                                                                                                                                                             |  |  |  |  |  |                                           |
|                                                           |                                                                                                                                                                                |                                                                                                                                                                                                             |  |  |  |  |  |                                           |
| <b>3</b>                                                  | Royalties or licenses                                                                                                                                                          | <input checked="" type="checkbox"/> <b>None</b><br><table border="1"> <tr><td></td><td></td></tr> <tr><td></td><td></td></tr> <tr><td></td><td></td></tr> </table>                                          |  |  |  |  |  |                                           |
|                                                           |                                                                                                                                                                                |                                                                                                                                                                                                             |  |  |  |  |  |                                           |
|                                                           |                                                                                                                                                                                |                                                                                                                                                                                                             |  |  |  |  |  |                                           |
|                                                           |                                                                                                                                                                                |                                                                                                                                                                                                             |  |  |  |  |  |                                           |

|    |                                                                                                              | Name all entities with whom you have this relationship or indicate none (add rows as needed)                                                                                                                                                                                                                                                                                                                 | Specifications/Comments (e.g., if payments were made to you or to your institution) |  |  |  |  |  |  |
|----|--------------------------------------------------------------------------------------------------------------|--------------------------------------------------------------------------------------------------------------------------------------------------------------------------------------------------------------------------------------------------------------------------------------------------------------------------------------------------------------------------------------------------------------|-------------------------------------------------------------------------------------|--|--|--|--|--|--|
| 4  | Consulting fees                                                                                              | <input checked="" type="checkbox"/> <b>None</b><br><table border="1" style="width: 100%;"> <tr> <td style="width: 50%; height: 20px;"></td> <td style="width: 50%; height: 20px;"></td> </tr> </table>                                                                                                                                                                                                       |                                                                                     |  |  |  |  |  |  |
|    |                                                                                                              |                                                                                                                                                                                                                                                                                                                                                                                                              |                                                                                     |  |  |  |  |  |  |
| 5  | Payment or honoraria for lectures, presentations, speakers bureaus, manuscript writing or educational events | <input checked="" type="checkbox"/> <b>None</b><br><table border="1" style="width: 100%;"> <tr> <td style="width: 50%; height: 20px;"></td> <td style="width: 50%; height: 20px;"></td> </tr> <tr> <td style="width: 50%; height: 20px;"></td> <td style="width: 50%; height: 20px;"></td> </tr> <tr> <td style="width: 50%; height: 20px;"></td> <td style="width: 50%; height: 20px;"></td> </tr> </table> |                                                                                     |  |  |  |  |  |  |
|    |                                                                                                              |                                                                                                                                                                                                                                                                                                                                                                                                              |                                                                                     |  |  |  |  |  |  |
|    |                                                                                                              |                                                                                                                                                                                                                                                                                                                                                                                                              |                                                                                     |  |  |  |  |  |  |
|    |                                                                                                              |                                                                                                                                                                                                                                                                                                                                                                                                              |                                                                                     |  |  |  |  |  |  |
| 6  | Payment for expert testimony                                                                                 | <input checked="" type="checkbox"/> <b>None</b><br><table border="1" style="width: 100%;"> <tr> <td style="width: 50%; height: 20px;"></td> <td style="width: 50%; height: 20px;"></td> </tr> <tr> <td style="width: 50%; height: 20px;"></td> <td style="width: 50%; height: 20px;"></td> </tr> <tr> <td style="width: 50%; height: 20px;"></td> <td style="width: 50%; height: 20px;"></td> </tr> </table> |                                                                                     |  |  |  |  |  |  |
|    |                                                                                                              |                                                                                                                                                                                                                                                                                                                                                                                                              |                                                                                     |  |  |  |  |  |  |
|    |                                                                                                              |                                                                                                                                                                                                                                                                                                                                                                                                              |                                                                                     |  |  |  |  |  |  |
|    |                                                                                                              |                                                                                                                                                                                                                                                                                                                                                                                                              |                                                                                     |  |  |  |  |  |  |
| 7  | Support for attending meetings and/or travel                                                                 | <input checked="" type="checkbox"/> <b>None</b><br><table border="1" style="width: 100%;"> <tr> <td style="width: 50%; height: 20px;"></td> <td style="width: 50%; height: 20px;"></td> </tr> <tr> <td style="width: 50%; height: 20px;"></td> <td style="width: 50%; height: 20px;"></td> </tr> <tr> <td style="width: 50%; height: 20px;"></td> <td style="width: 50%; height: 20px;"></td> </tr> </table> |                                                                                     |  |  |  |  |  |  |
|    |                                                                                                              |                                                                                                                                                                                                                                                                                                                                                                                                              |                                                                                     |  |  |  |  |  |  |
|    |                                                                                                              |                                                                                                                                                                                                                                                                                                                                                                                                              |                                                                                     |  |  |  |  |  |  |
|    |                                                                                                              |                                                                                                                                                                                                                                                                                                                                                                                                              |                                                                                     |  |  |  |  |  |  |
| 8  | Patents planned, issued or pending                                                                           | <input checked="" type="checkbox"/> <b>None</b><br><table border="1" style="width: 100%;"> <tr> <td style="width: 50%; height: 20px;"></td> <td style="width: 50%; height: 20px;"></td> </tr> <tr> <td style="width: 50%; height: 20px;"></td> <td style="width: 50%; height: 20px;"></td> </tr> <tr> <td style="width: 50%; height: 20px;"></td> <td style="width: 50%; height: 20px;"></td> </tr> </table> |                                                                                     |  |  |  |  |  |  |
|    |                                                                                                              |                                                                                                                                                                                                                                                                                                                                                                                                              |                                                                                     |  |  |  |  |  |  |
|    |                                                                                                              |                                                                                                                                                                                                                                                                                                                                                                                                              |                                                                                     |  |  |  |  |  |  |
|    |                                                                                                              |                                                                                                                                                                                                                                                                                                                                                                                                              |                                                                                     |  |  |  |  |  |  |
| 9  | Participation on a Data Safety Monitoring Board or Advisory Board                                            | <input type="checkbox"/> <b>None</b><br><table border="1" style="width: 100%;"> <tr> <td style="width: 50%; height: 20px;"></td> <td style="width: 50%; height: 20px;"></td> </tr> <tr> <td style="width: 50%; height: 20px;"></td> <td style="width: 50%; height: 20px;"></td> </tr> <tr> <td style="width: 50%; height: 20px;"></td> <td style="width: 50%; height: 20px;"></td> </tr> </table>            |                                                                                     |  |  |  |  |  |  |
|    |                                                                                                              |                                                                                                                                                                                                                                                                                                                                                                                                              |                                                                                     |  |  |  |  |  |  |
|    |                                                                                                              |                                                                                                                                                                                                                                                                                                                                                                                                              |                                                                                     |  |  |  |  |  |  |
|    |                                                                                                              |                                                                                                                                                                                                                                                                                                                                                                                                              |                                                                                     |  |  |  |  |  |  |
| 10 | Leadership or fiduciary role in other board, society, committee or advocacy group, paid or unpaid            | <input checked="" type="checkbox"/> <b>None</b><br><table border="1" style="width: 100%;"> <tr> <td style="width: 50%; height: 20px;"></td> <td style="width: 50%; height: 20px;"></td> </tr> <tr> <td style="width: 50%; height: 20px;"></td> <td style="width: 50%; height: 20px;"></td> </tr> <tr> <td style="width: 50%; height: 20px;"></td> <td style="width: 50%; height: 20px;"></td> </tr> </table> |                                                                                     |  |  |  |  |  |  |
|    |                                                                                                              |                                                                                                                                                                                                                                                                                                                                                                                                              |                                                                                     |  |  |  |  |  |  |
|    |                                                                                                              |                                                                                                                                                                                                                                                                                                                                                                                                              |                                                                                     |  |  |  |  |  |  |
|    |                                                                                                              |                                                                                                                                                                                                                                                                                                                                                                                                              |                                                                                     |  |  |  |  |  |  |

|                                                                                                                                                                                                                                                               |                                                                                  | Name all entities with whom you have this relationship or indicate none (add rows as needed) | Specifications/Comments (e.g., if payments were made to you or to your institution) |
|---------------------------------------------------------------------------------------------------------------------------------------------------------------------------------------------------------------------------------------------------------------|----------------------------------------------------------------------------------|----------------------------------------------------------------------------------------------|-------------------------------------------------------------------------------------|
| <b>11</b>                                                                                                                                                                                                                                                     | Stock or stock options                                                           | <input checked="" type="checkbox"/> <b>None</b>                                              |                                                                                     |
|                                                                                                                                                                                                                                                               |                                                                                  |                                                                                              |                                                                                     |
|                                                                                                                                                                                                                                                               |                                                                                  |                                                                                              |                                                                                     |
|                                                                                                                                                                                                                                                               |                                                                                  |                                                                                              |                                                                                     |
| <b>12</b>                                                                                                                                                                                                                                                     | Receipt of equipment, materials, drugs, medical writing, gifts or other services | <input checked="" type="checkbox"/> <b>None</b>                                              |                                                                                     |
|                                                                                                                                                                                                                                                               |                                                                                  |                                                                                              |                                                                                     |
|                                                                                                                                                                                                                                                               |                                                                                  |                                                                                              |                                                                                     |
|                                                                                                                                                                                                                                                               |                                                                                  |                                                                                              |                                                                                     |
| <b>13</b>                                                                                                                                                                                                                                                     | Other financial or non-financial interests                                       | <input checked="" type="checkbox"/> <b>None</b>                                              |                                                                                     |
|                                                                                                                                                                                                                                                               |                                                                                  |                                                                                              |                                                                                     |
|                                                                                                                                                                                                                                                               |                                                                                  |                                                                                              |                                                                                     |
|                                                                                                                                                                                                                                                               |                                                                                  |                                                                                              |                                                                                     |
| <p><b>Please place an "X" next to the following statement to indicate your agreement:</b></p> <p><input checked="" type="checkbox"/> I certify that I have answered every question and have not altered the wording of any of the questions on this form.</p> |                                                                                  |                                                                                              |                                                                                     |

# ICMJE DISCLOSURE FORM

**Date:** 29/09/2022

**Your Name:** Andrew Hazel

**Manuscript Title:** ClinCirc identifies alterations of the circadian peripheral oscillator in critical care patients

**Manuscript Number (if known):** 162775-JCI-CMED-1.

In the interest of transparency, we ask you to disclose all relationships/activities/interests listed below that are related to the content of your manuscript. "Related" means any relation with for-profit or not-for-profit third parties whose interests may be affected by the content of the manuscript. Disclosure represents a commitment to transparency and does not necessarily indicate a bias. If you are in doubt about whether to list a relationship/activity/interest, it is preferable that you do so.

The author's relationships/activities/interests should be defined broadly. For example, if your manuscript pertains to the epidemiology of hypertension, you should declare all relationships with manufacturers of antihypertensive medication, even if that medication is not mentioned in the manuscript.

In item #1 below, report all support for the work reported in this manuscript without time limit. For all other items, the time frame for disclosure is the past 36 months.

|                                                           | Name all entities with whom you have this relationship or indicate none (add rows as needed)                                                                                   | Specifications/Comments (e.g., if payments were made to you or to your institution)                                                                                                                                                   |                      |                               |               |                                  |  |                                           |
|-----------------------------------------------------------|--------------------------------------------------------------------------------------------------------------------------------------------------------------------------------|---------------------------------------------------------------------------------------------------------------------------------------------------------------------------------------------------------------------------------------|----------------------|-------------------------------|---------------|----------------------------------|--|-------------------------------------------|
| <b>Time frame: Since the initial planning of the work</b> |                                                                                                                                                                                |                                                                                                                                                                                                                                       |                      |                               |               |                                  |  |                                           |
| <b>1</b>                                                  | All support for the present manuscript (e.g., funding, provision of study materials, medical writing, article processing charges, etc.)<br><b>No time limit for this item.</b> | <input checked="" type="checkbox"/> <b>None</b><br><table border="1"> <tr><td></td><td></td></tr> <tr><td></td><td></td></tr> <tr><td></td><td>Click the tab key to add additional rows.</td></tr> </table>                           |                      |                               |               |                                  |  | Click the tab key to add additional rows. |
|                                                           |                                                                                                                                                                                |                                                                                                                                                                                                                                       |                      |                               |               |                                  |  |                                           |
|                                                           |                                                                                                                                                                                |                                                                                                                                                                                                                                       |                      |                               |               |                                  |  |                                           |
|                                                           | Click the tab key to add additional rows.                                                                                                                                      |                                                                                                                                                                                                                                       |                      |                               |               |                                  |  |                                           |
| <b>Time frame: past 36 months</b>                         |                                                                                                                                                                                |                                                                                                                                                                                                                                       |                      |                               |               |                                  |  |                                           |
| <b>2</b>                                                  | Grants or contracts from any entity (if not indicated in item #1 above).                                                                                                       | <b>None</b><br><table border="1"> <tr> <td>EPSRC (EP/S033211/1)</td> <td>Research Grant to Institution</td> </tr> <tr> <td>Moltex Energy</td> <td>Research Contract to Institution</td> </tr> <tr> <td></td> <td></td> </tr> </table> | EPSRC (EP/S033211/1) | Research Grant to Institution | Moltex Energy | Research Contract to Institution |  |                                           |
| EPSRC (EP/S033211/1)                                      | Research Grant to Institution                                                                                                                                                  |                                                                                                                                                                                                                                       |                      |                               |               |                                  |  |                                           |
| Moltex Energy                                             | Research Contract to Institution                                                                                                                                               |                                                                                                                                                                                                                                       |                      |                               |               |                                  |  |                                           |
|                                                           |                                                                                                                                                                                |                                                                                                                                                                                                                                       |                      |                               |               |                                  |  |                                           |
| <b>3</b>                                                  | Royalties or licenses                                                                                                                                                          | <input checked="" type="checkbox"/> <b>None</b><br><table border="1"> <tr><td></td><td></td></tr> <tr><td></td><td></td></tr> <tr><td></td><td></td></tr> </table>                                                                    |                      |                               |               |                                  |  |                                           |
|                                                           |                                                                                                                                                                                |                                                                                                                                                                                                                                       |                      |                               |               |                                  |  |                                           |
|                                                           |                                                                                                                                                                                |                                                                                                                                                                                                                                       |                      |                               |               |                                  |  |                                           |
|                                                           |                                                                                                                                                                                |                                                                                                                                                                                                                                       |                      |                               |               |                                  |  |                                           |

|                                                            |                                                                                                              | Name all entities with whom you have this relationship or indicate none (add rows as needed)                                                                                                                                                                                                                              | Specifications/Comments (e.g., if payments were made to you or to your institution) |                                                     |                                                  |  |                                                            |  |  |  |  |
|------------------------------------------------------------|--------------------------------------------------------------------------------------------------------------|---------------------------------------------------------------------------------------------------------------------------------------------------------------------------------------------------------------------------------------------------------------------------------------------------------------------------|-------------------------------------------------------------------------------------|-----------------------------------------------------|--------------------------------------------------|--|------------------------------------------------------------|--|--|--|--|
| 4                                                          | Consulting fees                                                                                              | <input checked="" type="checkbox"/> <b>None</b> <table border="1" data-bbox="380 289 1511 426"> <tr><td></td><td></td></tr> <tr><td></td><td></td></tr> <tr><td></td><td></td></tr> <tr><td></td><td></td></tr> </table>                                                                                                  |                                                                                     |                                                     |                                                  |  |                                                            |  |  |  |  |
|                                                            |                                                                                                              |                                                                                                                                                                                                                                                                                                                           |                                                                                     |                                                     |                                                  |  |                                                            |  |  |  |  |
|                                                            |                                                                                                              |                                                                                                                                                                                                                                                                                                                           |                                                                                     |                                                     |                                                  |  |                                                            |  |  |  |  |
|                                                            |                                                                                                              |                                                                                                                                                                                                                                                                                                                           |                                                                                     |                                                     |                                                  |  |                                                            |  |  |  |  |
|                                                            |                                                                                                              |                                                                                                                                                                                                                                                                                                                           |                                                                                     |                                                     |                                                  |  |                                                            |  |  |  |  |
| 5                                                          | Payment or honoraria for lectures, presentations, speakers bureaus, manuscript writing or educational events | <input checked="" type="checkbox"/> <b>None</b> <table border="1" data-bbox="380 512 1511 615"> <tr><td></td><td></td></tr> <tr><td></td><td></td></tr> <tr><td></td><td></td></tr> </table>                                                                                                                              |                                                                                     |                                                     |                                                  |  |                                                            |  |  |  |  |
|                                                            |                                                                                                              |                                                                                                                                                                                                                                                                                                                           |                                                                                     |                                                     |                                                  |  |                                                            |  |  |  |  |
|                                                            |                                                                                                              |                                                                                                                                                                                                                                                                                                                           |                                                                                     |                                                     |                                                  |  |                                                            |  |  |  |  |
|                                                            |                                                                                                              |                                                                                                                                                                                                                                                                                                                           |                                                                                     |                                                     |                                                  |  |                                                            |  |  |  |  |
| 6                                                          | Payment for expert testimony                                                                                 | <input checked="" type="checkbox"/> <b>None</b> <table border="1" data-bbox="380 856 1511 959"> <tr><td></td><td></td></tr> <tr><td></td><td></td></tr> <tr><td></td><td></td></tr> </table>                                                                                                                              |                                                                                     |                                                     |                                                  |  |                                                            |  |  |  |  |
|                                                            |                                                                                                              |                                                                                                                                                                                                                                                                                                                           |                                                                                     |                                                     |                                                  |  |                                                            |  |  |  |  |
|                                                            |                                                                                                              |                                                                                                                                                                                                                                                                                                                           |                                                                                     |                                                     |                                                  |  |                                                            |  |  |  |  |
|                                                            |                                                                                                              |                                                                                                                                                                                                                                                                                                                           |                                                                                     |                                                     |                                                  |  |                                                            |  |  |  |  |
| 7                                                          | Support for attending meetings and/or travel                                                                 | <b>None</b> <table border="1" data-bbox="380 1073 1511 1207"> <tr> <td>University of Groningen</td> <td>Travel and Accommodation at Conference, August 2022</td> </tr> <tr><td></td><td></td></tr> <tr><td></td><td></td></tr> </table>                                                                                   | University of Groningen                                                             | Travel and Accommodation at Conference, August 2022 |                                                  |  |                                                            |  |  |  |  |
| University of Groningen                                    | Travel and Accommodation at Conference, August 2022                                                          |                                                                                                                                                                                                                                                                                                                           |                                                                                     |                                                     |                                                  |  |                                                            |  |  |  |  |
|                                                            |                                                                                                              |                                                                                                                                                                                                                                                                                                                           |                                                                                     |                                                     |                                                  |  |                                                            |  |  |  |  |
|                                                            |                                                                                                              |                                                                                                                                                                                                                                                                                                                           |                                                                                     |                                                     |                                                  |  |                                                            |  |  |  |  |
| 8                                                          | Patents planned, issued or pending                                                                           | <input checked="" type="checkbox"/> <b>None</b> <table border="1" data-bbox="380 1293 1511 1396"> <tr><td></td><td></td></tr> <tr><td></td><td></td></tr> <tr><td></td><td></td></tr> </table>                                                                                                                            |                                                                                     |                                                     |                                                  |  |                                                            |  |  |  |  |
|                                                            |                                                                                                              |                                                                                                                                                                                                                                                                                                                           |                                                                                     |                                                     |                                                  |  |                                                            |  |  |  |  |
|                                                            |                                                                                                              |                                                                                                                                                                                                                                                                                                                           |                                                                                     |                                                     |                                                  |  |                                                            |  |  |  |  |
|                                                            |                                                                                                              |                                                                                                                                                                                                                                                                                                                           |                                                                                     |                                                     |                                                  |  |                                                            |  |  |  |  |
| 9                                                          | Participation on a Data Safety Monitoring Board or Advisory Board                                            | <input checked="" type="checkbox"/> <b>None</b> <table border="1" data-bbox="380 1512 1511 1614"> <tr><td></td><td></td></tr> <tr><td></td><td></td></tr> <tr><td></td><td></td></tr> </table>                                                                                                                            |                                                                                     |                                                     |                                                  |  |                                                            |  |  |  |  |
|                                                            |                                                                                                              |                                                                                                                                                                                                                                                                                                                           |                                                                                     |                                                     |                                                  |  |                                                            |  |  |  |  |
|                                                            |                                                                                                              |                                                                                                                                                                                                                                                                                                                           |                                                                                     |                                                     |                                                  |  |                                                            |  |  |  |  |
|                                                            |                                                                                                              |                                                                                                                                                                                                                                                                                                                           |                                                                                     |                                                     |                                                  |  |                                                            |  |  |  |  |
| 10                                                         | Leadership or fiduciary role in other board, society, committee or advocacy group, paid or unpaid            | <b>None</b> <table border="1" data-bbox="380 1698 1511 1833"> <tr> <td>External Examiner at The University of Leeds</td> <td></td> </tr> <tr> <td>External Examiner at The University of Sheffield</td> <td></td> </tr> <tr> <td>Editor in Chief, Computer Physics Communications, Elsevier</td> <td></td> </tr> </table> | External Examiner at The University of Leeds                                        |                                                     | External Examiner at The University of Sheffield |  | Editor in Chief, Computer Physics Communications, Elsevier |  |  |  |  |
| External Examiner at The University of Leeds               |                                                                                                              |                                                                                                                                                                                                                                                                                                                           |                                                                                     |                                                     |                                                  |  |                                                            |  |  |  |  |
| External Examiner at The University of Sheffield           |                                                                                                              |                                                                                                                                                                                                                                                                                                                           |                                                                                     |                                                     |                                                  |  |                                                            |  |  |  |  |
| Editor in Chief, Computer Physics Communications, Elsevier |                                                                                                              |                                                                                                                                                                                                                                                                                                                           |                                                                                     |                                                     |                                                  |  |                                                            |  |  |  |  |

|                                                                                 |                                                                                                                      | Name all entities with whom you have this relationship or indicate none (add rows as needed) | Specifications/Comments (e.g., if payments were made to you or to your institution) |
|---------------------------------------------------------------------------------|----------------------------------------------------------------------------------------------------------------------|----------------------------------------------------------------------------------------------|-------------------------------------------------------------------------------------|
| 11                                                                              | Stock or stock options                                                                                               | <input checked="" type="checkbox"/> None                                                     |                                                                                     |
|                                                                                 |                                                                                                                      |                                                                                              |                                                                                     |
|                                                                                 |                                                                                                                      |                                                                                              |                                                                                     |
|                                                                                 |                                                                                                                      |                                                                                              |                                                                                     |
| 12                                                                              | Receipt of equipment, materials, drugs, medical writing, gifts or other services                                     | <input checked="" type="checkbox"/> None                                                     |                                                                                     |
|                                                                                 |                                                                                                                      |                                                                                              |                                                                                     |
|                                                                                 |                                                                                                                      |                                                                                              |                                                                                     |
|                                                                                 |                                                                                                                      |                                                                                              |                                                                                     |
| 13                                                                              | Other financial or non-financial interests                                                                           | <input checked="" type="checkbox"/> None                                                     |                                                                                     |
|                                                                                 |                                                                                                                      |                                                                                              |                                                                                     |
|                                                                                 |                                                                                                                      |                                                                                              |                                                                                     |
|                                                                                 |                                                                                                                      |                                                                                              |                                                                                     |
| Please place an "X" next to the following statement to indicate your agreement: |                                                                                                                      |                                                                                              |                                                                                     |
| <input checked="" type="checkbox"/>                                             | I certify that I have answered every question and have not altered the wording of any of the questions on this form. |                                                                                              |                                                                                     |



# ICMJE DISCLOSURE FORM

**Date:** 10/12/2022

**Your Name:** Dr. John Blaikley

**Manuscript Title:** ClinCirc identifies alterations of the circadian peripheral oscillator in critical care patients

**Manuscript Number (if known):** 162775-JCI-CMED-1

In the interest of transparency, we ask you to disclose all relationships/activities/interests listed below that are related to the content of your manuscript. "Related" means any relation with for-profit or not-for-profit third parties whose interests may be affected by the content of the manuscript. Disclosure represents a commitment to transparency and does not necessarily indicate a bias. If you are in doubt about whether to list a relationship/activity/interest, it is preferable that you do so.

The author's relationships/activities/interests should be defined broadly. For example, if your manuscript pertains to the epidemiology of hypertension, you should declare all relationships with manufacturers of antihypertensive medication, even if that medication is not mentioned in the manuscript.

In item #1 below, report all support for the work reported in this manuscript without time limit. For all other items, the time frame for disclosure is the past 36 months.

|                                                           | Name all entities with whom you have this relationship or indicate none (add rows as needed)                                                                                   | Specifications/Comments (e.g., if payments were made to you or to your institution)                                                                                                                                                                                                                                                                                                                                                                                                                                                                                                                             |                           |                                     |                                           |                                     |                     |                                       |                      |                        |                                            |                        |                       |                        |
|-----------------------------------------------------------|--------------------------------------------------------------------------------------------------------------------------------------------------------------------------------|-----------------------------------------------------------------------------------------------------------------------------------------------------------------------------------------------------------------------------------------------------------------------------------------------------------------------------------------------------------------------------------------------------------------------------------------------------------------------------------------------------------------------------------------------------------------------------------------------------------------|---------------------------|-------------------------------------|-------------------------------------------|-------------------------------------|---------------------|---------------------------------------|----------------------|------------------------|--------------------------------------------|------------------------|-----------------------|------------------------|
| <b>Time frame: Since the initial planning of the work</b> |                                                                                                                                                                                |                                                                                                                                                                                                                                                                                                                                                                                                                                                                                                                                                                                                                 |                           |                                     |                                           |                                     |                     |                                       |                      |                        |                                            |                        |                       |                        |
| <b>1</b>                                                  | All support for the present manuscript (e.g., funding, provision of study materials, medical writing, article processing charges, etc.)<br><b>No time limit for this item.</b> | <input type="checkbox"/> <b>None</b> <table border="1"> <tr> <td>MRC Transition Fellowship</td> <td>MR/T032529/1 payment to institution</td> </tr> <tr> <td>MRC Clinical research Training fellowship</td> <td>MR/N002024/1 payment to institution</td> </tr> <tr> <td>NIAA research grant</td> <td>WKRO-2019-0037 payment to institution</td> </tr> <tr> <td>Asthma+Lung UK grant</td> <td>Payment to institution</td> </tr> <tr> <td>NIHR Manchester Biomedical Research Centre</td> <td>Payment to institution</td> </tr> <tr> <td>Kidney for Life Grant</td> <td>Payment to institution</td> </tr> </table> | MRC Transition Fellowship | MR/T032529/1 payment to institution | MRC Clinical research Training fellowship | MR/N002024/1 payment to institution | NIAA research grant | WKRO-2019-0037 payment to institution | Asthma+Lung UK grant | Payment to institution | NIHR Manchester Biomedical Research Centre | Payment to institution | Kidney for Life Grant | Payment to institution |
| MRC Transition Fellowship                                 | MR/T032529/1 payment to institution                                                                                                                                            |                                                                                                                                                                                                                                                                                                                                                                                                                                                                                                                                                                                                                 |                           |                                     |                                           |                                     |                     |                                       |                      |                        |                                            |                        |                       |                        |
| MRC Clinical research Training fellowship                 | MR/N002024/1 payment to institution                                                                                                                                            |                                                                                                                                                                                                                                                                                                                                                                                                                                                                                                                                                                                                                 |                           |                                     |                                           |                                     |                     |                                       |                      |                        |                                            |                        |                       |                        |
| NIAA research grant                                       | WKRO-2019-0037 payment to institution                                                                                                                                          |                                                                                                                                                                                                                                                                                                                                                                                                                                                                                                                                                                                                                 |                           |                                     |                                           |                                     |                     |                                       |                      |                        |                                            |                        |                       |                        |
| Asthma+Lung UK grant                                      | Payment to institution                                                                                                                                                         |                                                                                                                                                                                                                                                                                                                                                                                                                                                                                                                                                                                                                 |                           |                                     |                                           |                                     |                     |                                       |                      |                        |                                            |                        |                       |                        |
| NIHR Manchester Biomedical Research Centre                | Payment to institution                                                                                                                                                         |                                                                                                                                                                                                                                                                                                                                                                                                                                                                                                                                                                                                                 |                           |                                     |                                           |                                     |                     |                                       |                      |                        |                                            |                        |                       |                        |
| Kidney for Life Grant                                     | Payment to institution                                                                                                                                                         |                                                                                                                                                                                                                                                                                                                                                                                                                                                                                                                                                                                                                 |                           |                                     |                                           |                                     |                     |                                       |                      |                        |                                            |                        |                       |                        |
| <b>Time frame: past 36 months</b>                         |                                                                                                                                                                                |                                                                                                                                                                                                                                                                                                                                                                                                                                                                                                                                                                                                                 |                           |                                     |                                           |                                     |                     |                                       |                      |                        |                                            |                        |                       |                        |
| <b>2</b>                                                  | Grants or contracts from any entity (if not indicated in item #1 above).                                                                                                       | <input checked="" type="checkbox"/> <b>None</b> <table border="1"> <tr> <td>UKRI Long COVID grant</td> <td>Payment to Institution</td> </tr> <tr> <td></td> <td></td> </tr> <tr> <td></td> <td></td> </tr> </table>                                                                                                                                                                                                                                                                                                                                                                                             | UKRI Long COVID grant     | Payment to Institution              |                                           |                                     |                     |                                       |                      |                        |                                            |                        |                       |                        |
| UKRI Long COVID grant                                     | Payment to Institution                                                                                                                                                         |                                                                                                                                                                                                                                                                                                                                                                                                                                                                                                                                                                                                                 |                           |                                     |                                           |                                     |                     |                                       |                      |                        |                                            |                        |                       |                        |
|                                                           |                                                                                                                                                                                |                                                                                                                                                                                                                                                                                                                                                                                                                                                                                                                                                                                                                 |                           |                                     |                                           |                                     |                     |                                       |                      |                        |                                            |                        |                       |                        |
|                                                           |                                                                                                                                                                                |                                                                                                                                                                                                                                                                                                                                                                                                                                                                                                                                                                                                                 |                           |                                     |                                           |                                     |                     |                                       |                      |                        |                                            |                        |                       |                        |
| <b>3</b>                                                  | Royalties or licenses                                                                                                                                                          | <input checked="" type="checkbox"/> <b>None</b> <table border="1"> <tr> <td></td> <td></td> </tr> <tr> <td></td> <td></td> </tr> <tr> <td></td> <td></td> </tr> </table>                                                                                                                                                                                                                                                                                                                                                                                                                                        |                           |                                     |                                           |                                     |                     |                                       |                      |                        |                                            |                        |                       |                        |
|                                                           |                                                                                                                                                                                |                                                                                                                                                                                                                                                                                                                                                                                                                                                                                                                                                                                                                 |                           |                                     |                                           |                                     |                     |                                       |                      |                        |                                            |                        |                       |                        |
|                                                           |                                                                                                                                                                                |                                                                                                                                                                                                                                                                                                                                                                                                                                                                                                                                                                                                                 |                           |                                     |                                           |                                     |                     |                                       |                      |                        |                                            |                        |                       |                        |
|                                                           |                                                                                                                                                                                |                                                                                                                                                                                                                                                                                                                                                                                                                                                                                                                                                                                                                 |                           |                                     |                                           |                                     |                     |                                       |                      |                        |                                            |                        |                       |                        |

|                           |                                                                                                              | Name all entities with whom you have this relationship or indicate none (add rows as needed)                                                                                                                                                                                                                                   | Specifications/Comments (e.g., if payments were made to you or to your institution) |                           |                                                                           |          |                                                                           |  |  |  |  |
|---------------------------|--------------------------------------------------------------------------------------------------------------|--------------------------------------------------------------------------------------------------------------------------------------------------------------------------------------------------------------------------------------------------------------------------------------------------------------------------------|-------------------------------------------------------------------------------------|---------------------------|---------------------------------------------------------------------------|----------|---------------------------------------------------------------------------|--|--|--|--|
| 4                         | Consulting fees                                                                                              | <input checked="" type="checkbox"/> <b>None</b><br><table border="1"> <tr><td></td><td></td></tr> <tr><td></td><td></td></tr> <tr><td></td><td></td></tr> <tr><td></td><td></td></tr> </table>                                                                                                                                 |                                                                                     |                           |                                                                           |          |                                                                           |  |  |  |  |
|                           |                                                                                                              |                                                                                                                                                                                                                                                                                                                                |                                                                                     |                           |                                                                           |          |                                                                           |  |  |  |  |
|                           |                                                                                                              |                                                                                                                                                                                                                                                                                                                                |                                                                                     |                           |                                                                           |          |                                                                           |  |  |  |  |
|                           |                                                                                                              |                                                                                                                                                                                                                                                                                                                                |                                                                                     |                           |                                                                           |          |                                                                           |  |  |  |  |
|                           |                                                                                                              |                                                                                                                                                                                                                                                                                                                                |                                                                                     |                           |                                                                           |          |                                                                           |  |  |  |  |
| 5                         | Payment or honoraria for lectures, presentations, speakers bureaus, manuscript writing or educational events | <input checked="" type="checkbox"/> <b>None</b><br><table border="1"> <tr><td></td><td></td></tr> <tr><td></td><td></td></tr> <tr><td></td><td></td></tr> </table>                                                                                                                                                             |                                                                                     |                           |                                                                           |          |                                                                           |  |  |  |  |
|                           |                                                                                                              |                                                                                                                                                                                                                                                                                                                                |                                                                                     |                           |                                                                           |          |                                                                           |  |  |  |  |
|                           |                                                                                                              |                                                                                                                                                                                                                                                                                                                                |                                                                                     |                           |                                                                           |          |                                                                           |  |  |  |  |
|                           |                                                                                                              |                                                                                                                                                                                                                                                                                                                                |                                                                                     |                           |                                                                           |          |                                                                           |  |  |  |  |
| 6                         | Payment for expert testimony                                                                                 | <input checked="" type="checkbox"/> <b>None</b><br><table border="1"> <tr><td></td><td></td></tr> <tr><td></td><td></td></tr> <tr><td></td><td></td></tr> </table>                                                                                                                                                             |                                                                                     |                           |                                                                           |          |                                                                           |  |  |  |  |
|                           |                                                                                                              |                                                                                                                                                                                                                                                                                                                                |                                                                                     |                           |                                                                           |          |                                                                           |  |  |  |  |
|                           |                                                                                                              |                                                                                                                                                                                                                                                                                                                                |                                                                                     |                           |                                                                           |          |                                                                           |  |  |  |  |
|                           |                                                                                                              |                                                                                                                                                                                                                                                                                                                                |                                                                                     |                           |                                                                           |          |                                                                           |  |  |  |  |
| 7                         | Support for attending meetings and/or travel                                                                 | <input type="checkbox"/> <b>None</b><br><table border="1"> <tr> <td>TEVA</td> <td>Paid for travel and accommodation directly to providers to attend meeting</td> </tr> <tr> <td>Therakos</td> <td>Paid for travel and accommodation directly to providers to attend meeting</td> </tr> <tr> <td></td> <td></td> </tr> </table> |                                                                                     | TEVA                      | Paid for travel and accommodation directly to providers to attend meeting | Therakos | Paid for travel and accommodation directly to providers to attend meeting |  |  |  |  |
| TEVA                      | Paid for travel and accommodation directly to providers to attend meeting                                    |                                                                                                                                                                                                                                                                                                                                |                                                                                     |                           |                                                                           |          |                                                                           |  |  |  |  |
| Therakos                  | Paid for travel and accommodation directly to providers to attend meeting                                    |                                                                                                                                                                                                                                                                                                                                |                                                                                     |                           |                                                                           |          |                                                                           |  |  |  |  |
|                           |                                                                                                              |                                                                                                                                                                                                                                                                                                                                |                                                                                     |                           |                                                                           |          |                                                                           |  |  |  |  |
| 8                         | Patents planned, issued or pending                                                                           | <input checked="" type="checkbox"/> <b>None</b><br><table border="1"> <tr><td></td><td></td></tr> <tr><td></td><td></td></tr> <tr><td></td><td></td></tr> </table>                                                                                                                                                             |                                                                                     |                           |                                                                           |          |                                                                           |  |  |  |  |
|                           |                                                                                                              |                                                                                                                                                                                                                                                                                                                                |                                                                                     |                           |                                                                           |          |                                                                           |  |  |  |  |
|                           |                                                                                                              |                                                                                                                                                                                                                                                                                                                                |                                                                                     |                           |                                                                           |          |                                                                           |  |  |  |  |
|                           |                                                                                                              |                                                                                                                                                                                                                                                                                                                                |                                                                                     |                           |                                                                           |          |                                                                           |  |  |  |  |
| 9                         | Participation on a Data Safety Monitoring Board or Advisory Board                                            | <input checked="" type="checkbox"/> <b>None</b><br><table border="1"> <tr><td></td><td></td></tr> <tr><td></td><td></td></tr> <tr><td></td><td></td></tr> </table>                                                                                                                                                             |                                                                                     |                           |                                                                           |          |                                                                           |  |  |  |  |
|                           |                                                                                                              |                                                                                                                                                                                                                                                                                                                                |                                                                                     |                           |                                                                           |          |                                                                           |  |  |  |  |
|                           |                                                                                                              |                                                                                                                                                                                                                                                                                                                                |                                                                                     |                           |                                                                           |          |                                                                           |  |  |  |  |
|                           |                                                                                                              |                                                                                                                                                                                                                                                                                                                                |                                                                                     |                           |                                                                           |          |                                                                           |  |  |  |  |
| 10                        | Leadership or fiduciary role in other board, society, committee or advocacy group, paid or unpaid            | <input type="checkbox"/> <b>None</b><br><table border="1"> <tr> <td>Royal Society of Medicine</td> <td>Committee Member</td> </tr> <tr><td></td><td></td></tr> <tr><td></td><td></td></tr> </table>                                                                                                                            |                                                                                     | Royal Society of Medicine | Committee Member                                                          |          |                                                                           |  |  |  |  |
| Royal Society of Medicine | Committee Member                                                                                             |                                                                                                                                                                                                                                                                                                                                |                                                                                     |                           |                                                                           |          |                                                                           |  |  |  |  |
|                           |                                                                                                              |                                                                                                                                                                                                                                                                                                                                |                                                                                     |                           |                                                                           |          |                                                                           |  |  |  |  |
|                           |                                                                                                              |                                                                                                                                                                                                                                                                                                                                |                                                                                     |                           |                                                                           |          |                                                                           |  |  |  |  |

|           |                                                                                  | Name all entities with whom you have this relationship or indicate none (add rows as needed)                                                                                                          | Specifications/Comments (e.g., if payments were made to you or to your institution) |  |  |  |  |  |  |
|-----------|----------------------------------------------------------------------------------|-------------------------------------------------------------------------------------------------------------------------------------------------------------------------------------------------------|-------------------------------------------------------------------------------------|--|--|--|--|--|--|
| <b>11</b> | Stock or stock options                                                           | <input checked="" type="checkbox"/> <b>None</b> <table border="1" style="width: 100%; margin-top: 5px;"> <tr><td></td><td></td></tr> <tr><td></td><td></td></tr> <tr><td></td><td></td></tr> </table> |                                                                                     |  |  |  |  |  |  |
|           |                                                                                  |                                                                                                                                                                                                       |                                                                                     |  |  |  |  |  |  |
|           |                                                                                  |                                                                                                                                                                                                       |                                                                                     |  |  |  |  |  |  |
|           |                                                                                  |                                                                                                                                                                                                       |                                                                                     |  |  |  |  |  |  |
| <b>12</b> | Receipt of equipment, materials, drugs, medical writing, gifts or other services | <input checked="" type="checkbox"/> <b>None</b> <table border="1" style="width: 100%; margin-top: 5px;"> <tr><td></td><td></td></tr> <tr><td></td><td></td></tr> <tr><td></td><td></td></tr> </table> |                                                                                     |  |  |  |  |  |  |
|           |                                                                                  |                                                                                                                                                                                                       |                                                                                     |  |  |  |  |  |  |
|           |                                                                                  |                                                                                                                                                                                                       |                                                                                     |  |  |  |  |  |  |
|           |                                                                                  |                                                                                                                                                                                                       |                                                                                     |  |  |  |  |  |  |
| <b>13</b> | Other financial or non-financial interests                                       | <input checked="" type="checkbox"/> <b>None</b> <table border="1" style="width: 100%; margin-top: 5px;"> <tr><td></td><td></td></tr> <tr><td></td><td></td></tr> <tr><td></td><td></td></tr> </table> |                                                                                     |  |  |  |  |  |  |
|           |                                                                                  |                                                                                                                                                                                                       |                                                                                     |  |  |  |  |  |  |
|           |                                                                                  |                                                                                                                                                                                                       |                                                                                     |  |  |  |  |  |  |
|           |                                                                                  |                                                                                                                                                                                                       |                                                                                     |  |  |  |  |  |  |

**Please place an "X" next to the following statement to indicate your agreement:**

☒ I certify that I have answered every question and have not altered the wording of any of the questions on this form.
